# Supplementary material for: Unusual rearrangement–remercuration reactions of allylic silanols
Source: Royal Society of Chemistry journal article supplement (doi:10.1039/d1qo01008e), 2021-01-01

## Supplementary Information

### **Unusual Rearrangement-Remercuration Reactions of Allylic Silanols**

Dr. Someshwar Nagamalla, Dr. Ranjeet A. Dhokale, Dr. Frederick J. Seidl, Professor Joel T. Mague, and Professor Shyam Sathyamoorthi\*

#### Table of Contents

- I. General Considerations
- II. Characterization of Allylic Silanol Substrates
- III. General Procedures for Formation of Ketone Organomercurial Products
- IV. Characterization of Ketone Organomercurial Products
- V. Scale-Up Procedure for Formation of **27**
- VI. Derivatization Reactions of Ketone Organomercurial Compounds
- VII. General Procedures for Formation of Cyclic Silanediol Organomercurial Products
- VIII. Characterization of Cyclic Silanediol Organomercurial Products
- IX. Crystallographic Information for Compound **63** (CCDC 2084035)
- X. Mechanistic Experiments
- XI. Computational Procedures and Results
- XII. NMR Spectra

## I. General Considerations

All reagents were obtained commercially unless otherwise noted. Solvents were purified by passage under 10 psi N<sub>2</sub> through activated alumina columns. Infrared (IR) spectra were recorded on a Thermo Scientific™ Nicolet™ iS™5 FT-IR Spectrometer; data are reported in frequency of absorption (cm<sup>-1</sup>). NMR spectra were recorded on a Bruker Avance 400 operating at 400 and 100 MHz. <sup>1</sup>H NMR spectra were recorded at 400 MHz. Data are recorded as: chemical shift in ppm referenced internally using residue solvent peaks, multiplicity (s = singlet, d = doublet, t = triplet, q = quartet, m = multiplet or overlap of nonequivalent resonances), integration, coupling constant (Hz). <sup>13</sup>C NMR spectra were recorded at 100 MHz. Exact mass spectra were recorded using an electrospray ion source (ESI) either in positive mode or negative mode and with a time-of-flight (TOF) analyzer on a Waters LCT Premier™ mass spectrometer and are given in m/z. TLC was performed on pre-coated glass plates (Merck) and visualized either with a UV lamp (254 nm) or by dipping into a solution of KMnO<sub>4</sub>-K<sub>2</sub>CO<sub>3</sub> in water followed by heating. Flash chromatography was performed on silica gel (230-400 mesh). Reversed phase HPLC was performed on a Hamilton PRP-1.7 μm, 21.2 x 250 mm, C18 column. Hg(OTf)<sub>2</sub> was purchased from either Alfa Aesar or Strem Chemicals. Di-*tert*-butylsilyl Bis(trifluoromethanesulfonate) was purchased from either TCI America or from Sigma-Aldrich.

## II. Characterization of Allylic Silanol Substrates

*Note 1: Substrates were synthesized according to previously reported procedures. See Org. Lett. 2020, 22, 8665–8669.*

**Compound 1:** Previously characterized in *Org. Lett.* **2020**, 22, 8665–8669

**Compound 2:** Previously characterized in *Org. Lett.* **2020**, 22, 8665–8669

**Compound 3:** Previously characterized in *Org. Lett.* **2020**, 22, 8665–8669

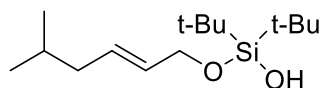

(*E*)-di-*tert*-butyl((5-methylhex-2-en-1-yl)oxy)silanol

**Compound 4:** Purified using a gradient of 0 to 0.2% acetone/DCM on silica gel; (light yellow oil, 272 mg, 50% yield); <sup>1</sup>H NMR (400 MHz, CDCl<sub>3</sub>) δ 5.69 (dtt, *J* = 15.0, 6.7, 1.3 Hz, 1H), 5.58 (dtt, *J* = 15.3, 5.3, 1.1 Hz, 1H), 4.33 (dq, *J* = 5.1, 1.2 Hz, 2H), 1.95 (tq, *J* = 6.9, 1.1 Hz, 2H), 1.64 (dq, *J* = 13.3, 6.7 Hz, 1H), 1.05 (s, 18H), 0.91 (d, *J* = 6.7 Hz, 6H). <sup>13</sup>C{<sup>1</sup>H} NMR (101 MHz, CDCl<sub>3</sub>) δ 130.4, 129.9, 64.1, 41.5, 28.3, 27.4, 22.2, 20.4.; IR 3393, 2895, 1467, 826 cm<sup>-1</sup>.; HRMS (ESI) calculated for C<sub>15</sub>H<sub>32</sub>NaO<sub>2</sub>Si<sup>+</sup> 295.2064 Found 295.2048 (MNa<sup>+</sup>).

**Compound 5:** Previously characterized in *Org. Lett.* **2020**, 22, 8665–8669

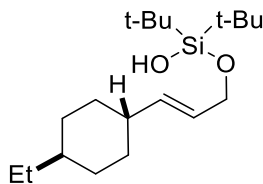

di-*tert*-butyl(((*E*)-3-(4-ethylcyclohexyl)allyl)oxy)silanol

**Compound 6:** Purified using a gradient of 0 to 0.2% Acetone/DCM on silica gel; (light yellow oil, 312 mg, 48% yield);  $^1\text{H}$  NMR (400 MHz,  $\text{CDCl}_3$ )  $\delta$  5.65 (ddt,  $J = 15.4, 6.2, 1.2$  Hz, 1H), 5.55 (dtd,  $J = 15.4, 5.2, 1.0$  Hz, 1H), 4.32 (dt,  $J = 5.2, 1.1$  Hz, 2H), 1.98 – 1.83 (m, 2H), 1.83 – 1.72 (m, 3H), 1.28 – 1.19 (m, 2H), 1.11 (ddt,  $J = 12.4, 8.8, 3.7$  Hz, 3H), 1.05 (s, 18H), 1.00 – 0.83 (m, 5H).  $^{13}\text{C}\{^1\text{H}\}$  NMR (101 MHz,  $\text{CDCl}_3$ )  $\delta$  137.1, 126.8, 64.3, 40.5, 39.0, 32.8, 32.5, 29.9, 27.4, 20.4, 11.5. IR 3491, 2899, 1470, 1103  $\text{cm}^{-1}$ ; HRMS (APCI) calculated for  $\text{C}_{19}\text{H}_{39}\text{O}_2\text{Si}^+$  327.2719 Found 327.2705 ( $\text{MH}^+$ ).

**Compound 7:** Previously characterized in *Molecules* **2021**, 26, 3829

**Compound 8:** Previously characterized in *J. Org. Chem.* **2021** DOI:10.1021/acs.joc.1c00872

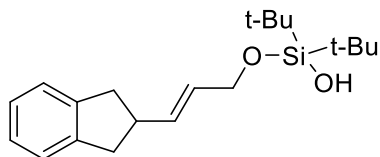

(*E*)-di-*tert*-butyl((3-(2,3-dihydro-1*H*-inden-2-yl)allyl)oxy)silanol

**Compound 9:** Purified using a gradient of 0 to 0.2% Acetone/DCM on silica gel; (light yellow oil, 300 mg, 45% yield);  $^1\text{H}$  NMR (400 MHz,  $\text{CDCl}_3$ )  $\delta$  7.32 – 7.09 (m, 4H), 6.00 – 5.83 (m, 1H), 5.83 – 5.66 (m, 1H), 4.39 (ddt,  $J = 5.2, 3.3, 1.9$  Hz, 2H), 3.25 – 3.04 (m, 3H), 2.92 – 2.73 (m, 2H), 1.10 (dd,  $J = 4.7, 2.2$  Hz, 18H).  $^{13}\text{C}\{^1\text{H}\}$  NMR (101 MHz,  $\text{CDCl}_3$ )  $\delta$  143.1, 134.3, 128.7, 126.2, 124.3, 64.0, 42.9, 39.4, 27.5, 20.5. IR 3494, 2940, 1467, 1221, 970  $\text{cm}^{-1}$ ; HRMS (APCI) Calculated for  $\text{C}_{20}\text{H}_{31}\text{O}_2\text{Si}^-$  331.2099 Found 331.2078 ( $\text{M}^-$ ).

**Compound 10:** Previously characterized in *Org. Lett.* **2020**, 22, 8665–8669

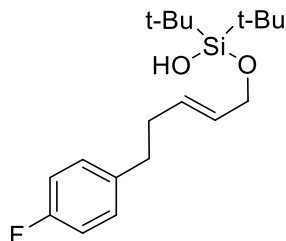

(*E*)-di-*tert*-butyl((5-(4-fluorophenyl)pent-2-en-1-yl)oxy)silanol

**Compound 11:** Purified using a gradient of 0 to 0.2% acetone/DCM on silica gel; (light yellow oil, 324 mg, 48% yield);  $^1\text{H}$  NMR (400 MHz,  $\text{CDCl}_3$ )  $\delta$  7.19 – 7.06 (m, 2H), 7.04 – 6.87 (m, 2H), 5.73 (dtt,  $J = 15.6, 6.3, 1.4$  Hz, 1H), 5.62 (dtt,  $J = 15.3, 5.2, 1.2$  Hz, 1H), 4.32 (dq,  $J = 5.0, 1.3$  Hz, 2H), 2.70 (dd,  $J = 8.7, 6.7$  Hz, 2H), 2.37 (dtd,  $J = 8.7, 6.3, 1.3$  Hz, 2H), 1.05 (s, 18H).  $^{13}\text{C}\{^1\text{H}\}$  NMR (101 MHz,  $\text{CDCl}_3$ )  $\delta$  161.2 (d,  $J = 243.1$  Hz), 137.4

(d,  $J = 3.2$  Hz), 130.2, 129.7 (d,  $J = 7.7$  Hz), 129.6, 115.0 (d,  $J = 21.0$  Hz), 63.9, 34.8, 34.0, 27.4, 20.5. IR 3982, 2860, 1604, 1473, 1195, 645  $\text{cm}^{-1}$ ; HRMS (APCI) calculated for  $\text{C}_{19}\text{H}_{30}\text{FO}_2\text{Si}^-$  337.2005 Found 337.1990 ( $\text{M}^-$ ).

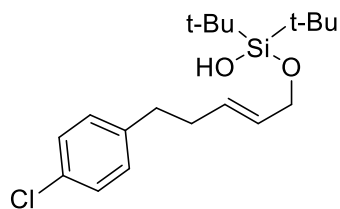

(*E*)-di-*tert*-butyl((5-(4-chlorophenyl)pent-2-en-1-yl)oxy)silanol

**Compound 12:** Purified using a gradient of 0 to 10% EtOAc in hexanes on silica gel; (white semi-solid, 390 mg, 55%);  $^1\text{H}$  NMR (400 MHz, Chloroform-*d*)  $\delta$  7.24 (d,  $J = 8.4$  Hz, 2H), 7.11 (d,  $J = 8.3$  Hz, 2H), 5.69 (dtt,  $J = 14.2, 6.4, 1.4$  Hz, 1H), 5.63 – 5.54 (m, 1H), 4.29 (dd,  $J = 5.0, 1.3$  Hz, 2H), 2.68 (dd,  $J = 8.6, 6.8$  Hz, 2H), 2.41 – 2.28 (m, 2H), 1.02 (s, 18H);  $^{13}\text{C}\{^1\text{H}\}$  NMR (101 MHz, Chloroform-*d*)  $\delta$  140.24, 131.51, 130.29, 129.80, 129.50, 128.37, 63.89, 34.97, 33.74, 27.40, 20.45; IR 2857, 1457, 1170  $\text{cm}^{-1}$ ; HRMS (APCI) calculated for  $\text{C}_{19}\text{H}_{30}\text{ClO}_2\text{Si}^-$  353.1704, found 353.1674 ( $\text{M}^-$ ).

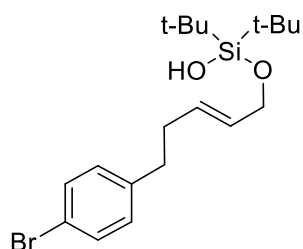

(*E*)-((5-(4-bromophenyl)pent-2-en-1-yl)oxy)di-*tert*-butylsilanol

**Compound 13:** Purified using a gradient of 0 to 2% acetone/ $\text{CH}_2\text{Cl}_2$  on silica gel; (colorless oil, 400 mg, 60% yield);  $^1\text{H}$  NMR (400 MHz,  $\text{CDCl}_3$ )  $\delta$  7.38 (d,  $J = 8.3$  Hz, 2H), 7.09 – 7.01 (m, 2H), 5.68 (dtt,  $J = 15.5, 6.2, 1.3$  Hz, 1H), 5.57 (dtt,  $J = 15.4, 5.2, 1.1$  Hz, 1H), 4.28 (dq,  $J = 4.8, 1.2$  Hz, 2H), 2.65 (dd,  $J = 8.6, 6.7$  Hz, 2H), 2.34 (dtd,  $J = 8.7, 6.4, 1.3$  Hz, 2H), 1.01 (s, 18H).  $^{13}\text{C}\{^1\text{H}\}$  NMR (101 MHz,  $\text{CDCl}_3$ ):  $\delta$  140.9, 131.5, 130.5, 130.4, 129.6, 119.7, 64.0, 35.2, 33.8, 27.6, 20.6. IR 3520, 2860, 1470, 1100  $\text{cm}^{-1}$ . HRMS (APCI) calculated for  $\text{C}_{19}\text{H}_{30}\text{BrO}_2\text{Si}^-$  397.1198 Found 397.1203 ( $\text{M}^-$ ).

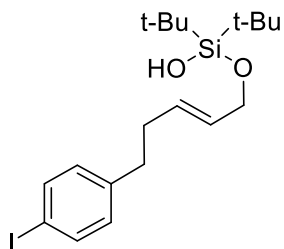

(*E*)-di-*tert*-butyl((5-(4-iodophenyl)pent-2-en-1-yl)oxy)silanol

**Compound 14:** Purified using a gradient of 0 to 0.2% acetone/DCM on silica gel; (colorless oil, 338 mg, 38% yield);  $^1\text{H}$  NMR (600 MHz,  $\text{CDCl}_3$ )  $\delta$  7.70 – 7.54 (m, 2H), 7.03 – 6.88 (m, 2H), 5.71 (dtt,  $J = 14.8, 6.6, 1.5$  Hz, 1H), 5.61 (dtt,  $J = 15.3, 5.1, 1.3$  Hz, 1H), 4.31 (dt,  $J = 5.0, 1.3$  Hz, 2H), 2.67 (dd,  $J = 8.6, 6.8$  Hz, 2H), 2.43

– 2.30 (m, 2H), 1.12 – 0.95 (m, 18H).  $^{13}\text{C}\{^1\text{H}\}$  NMR (151 MHz,  $\text{CDCl}_3$ )  $\delta$  141.4, 137.3, 130.6, 130.3, 129.4, 90.9, 63.9, 35.1, 33.7, 27.4, 20.5. IR 3499, 1473, 1124, 970, 645  $\text{cm}^{-1}$ ; HRMS (APCI) calculated for  $\text{C}_{19}\text{H}_{30}\text{IO}_2\text{Si}^-$  445.1065 Found 445.1062 ( $\text{M}^-$ ).

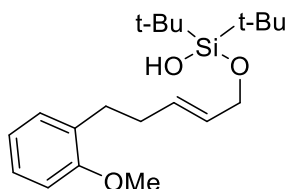

(*E*)-di-*tert*-butyl((5-(2-methoxyphenyl)pent-2-en-1-yl)oxy)silanol

**Compound 15:** Purification 0 to 10% EtOAc in hexanes under flash chromatography (oil, 518 mg, 74%);  $^1\text{H}$  NMR (400 MHz, Chloroform-*d*)  $\delta$  7.23 – 7.09 (m, 2H), 6.93 – 6.81 (m, 2H), 5.79 – 5.66 (m, 1H), 5.65–5.55 (m, 1H), 4.30 (dd,  $J$  = 5.2, 1.3 Hz, 2H), 3.83 (s, 3H), 2.73–2.69 (m, 2H), 2.37–2.31 (m, 2H), 1.03 (s, 18H).  $^{13}\text{C}$  NMR (101 MHz, Chloroform-*d*)  $\delta$  157.4, 130.8, 130.2, 129.8, 129.5, 127.0, 120.3, 110.3, 64.1, 55.2, 32.2, 30.0, 27.4, 20.4. IR 2857, 1494, 1161  $\text{cm}^{-1}$ . HRMS (APCI) calculated for  $\text{C}_{20}\text{H}_{33}\text{O}_3\text{Si}^-$  349.2199, found mass 349.2193 ( $\text{M}^-$ ).

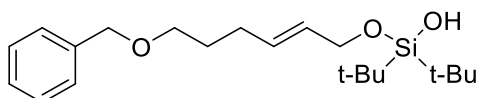

(*E*)-((6-(benzyloxy)hex-2-en-1-yl)oxy)di-*tert*-butylsilanol

**Compound 16:** Purified using a gradient of 0 to 5% acetone/DCM on silica gel; (light yellow oil, 370 mg, 50% yield);  $^1\text{H}$  NMR (400 MHz,  $\text{CDCl}_3$ )  $\delta$  7.49 – 7.20 (m, 5H), 5.71 (dddd,  $J$  = 15.6, 7.6, 4.6, 1.3 Hz, 1H), 5.66 – 5.55 (m, 1H), 4.53 (d,  $J$  = 1.3 Hz, 2H), 4.32 (dq,  $J$  = 5.1, 1.3 Hz, 2H), 3.51 (td,  $J$  = 6.5, 1.2 Hz, 2H), 2.21 – 2.12 (m, 2H), 1.74 (qd,  $J$  = 7.4, 5.8 Hz, 2H), 1.05 (d,  $J$  = 1.9 Hz, 18H).  $^{13}\text{C}\{^1\text{H}\}$  NMR (101 MHz,  $\text{CDCl}_3$ )  $\delta$  138.6, 130.4, 129.8, 128.3, 127.6, 127.5, 72.9, 69.7, 64.0, 29.3, 28.8, 27.4, 20.5. IR 3460, 2860, 1473, 1364, 970, 736  $\text{cm}^{-1}$ ; HRMS (APCI) calculated for  $\text{C}_{21}\text{H}_{35}\text{O}_3\text{Si}^-$  363.2361 Found 363.2356 ( $\text{M}^-$ ).

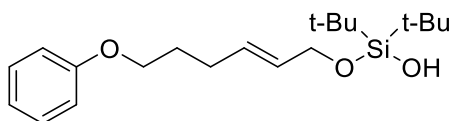

(*E*)-di-*tert*-butyl((6-phenoxyhex-2-en-1-yl)oxy)silanol

**Compound 17:** Purified using a gradient of 0 to 5% acetone/DCM on silica gel; (light yellow oil, 421 mg, 60% yield);  $^1\text{H}$  NMR (400 MHz,  $\text{CDCl}_3$ )  $\delta$  7.31 (ddt,  $J$  = 8.7, 6.5, 0.9 Hz, 2H), 7.01 – 6.89 (m, 3H), 5.81 – 5.71 (m, 1H), 5.71 – 5.61 (m, 1H), 4.34 (dh,  $J$  = 5.1, 1.3 Hz, 2H), 4.00 (ddd,  $J$  = 7.3, 6.1, 1.0 Hz, 2H), 2.27 (dddd,  $J$  = 10.1, 6.6, 2.4, 1.3 Hz, 2H), 1.97 – 1.86 (m, 2H), 1.13 – 1.00 (m, 18H).  $^{13}\text{C}\{^1\text{H}\}$  NMR (101 MHz,  $\text{CDCl}_3$ )  $\delta$  159.0, 130.2, 129.8, 129.4, 120.5, 114.5, 67.1, 64.0, 28.8, 28.6, 27.4, 20.5. IR 3499, 2860, 1598, 1364, 970, 690  $\text{cm}^{-1}$ ; HRMS (APCI) calculated for  $\text{C}_{20}\text{H}_{33}\text{O}_3\text{Si}^-$  349.2204 Found 349.2191 ( $\text{M}^-$ ).

**Compound 18:** Previously characterized in *Org. Lett.* **2020**, *22*, 8665–8669

**Compound 19:** Previously characterized in *Molecules* **2021**, *26*, 3829

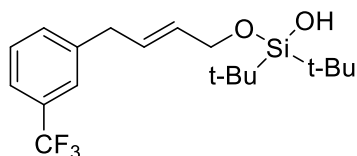

(*E*)-di-*tert*-butyl((4-(3-(trifluoromethyl)phenyl)but-2-en-1-yl)oxy)silanol

**Compound 20:** Purified using a gradient of 0 to 0.2% acetone/DCM; (light yellow oil, 361 mg, 50% yield);  $^1\text{H}$  NMR (400 MHz,  $\text{CDCl}_3$ )  $\delta$  7.54 – 7.32 (m, 4H), 5.88 (dtt,  $J = 15.1, 6.7, 1.5$  Hz, 1H), 5.69 (dtt,  $J = 15.3, 5.1, 1.4$  Hz, 1H), 4.38 (dq,  $J = 5.1, 1.3$  Hz, 2H), 3.47 (dd,  $J = 6.8, 1.5$  Hz, 2H), 1.05 (s, 18H).  $^{13}\text{C}\{^1\text{H}\}$  NMR (101 MHz,  $\text{CDCl}_3$ )  $\delta$  141.2, 131.9 (d,  $J = 1.5$  Hz), 131.6, 131.1 – 130.1 (q,  $J = 34$  Hz), 128.7, 128.3, 125.5 (q,  $J = 275$  Hz), 125.2 (q,  $J = 3.8$  Hz), 122.9 (q,  $J = 4.0$  Hz), 63.7, 38.2, 27.3, 20.4. IR 3477, 1473, 1330, 1073, 970,  $650\text{ cm}^{-1}$ ; HRMS (APCI) calculated for  $\text{C}_{19}\text{H}_{28}\text{F}_3\text{O}_2\text{Si}^-$  373.1816 Found 373.1798 ( $\text{M}^-$ ).

**Compound 21:** Previously characterized in *Molecules* **2021**, *26*, 3829

**Compound 22:** Previously characterized in *Molecules* **2021**, *26*, 3829

**Compound 23:** Previously characterized in *Molecules* **2021**, *26*, 3829

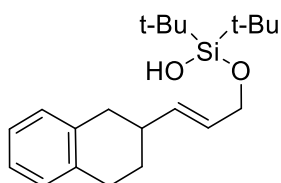

(*E*)-di-*tert*-butyl((3-(1,2,3,4-tetrahydronaphthalen-2-yl)allyl)oxy)silanol

**Compound 24:** Purified using a gradient of 0 to 0.2% acetone/DCM on silica gel; (light yellow oil, 265 mg, 49% yield);  $^1\text{H}$  NMR (400 MHz,  $\text{CDCl}_3$ )  $\delta$  7.09 (dq,  $J = 4.6, 2.2$  Hz, 4H), 5.82 – 5.69 (m, 1H), 5.65 (dtd,  $J = 15.5, 5.1, 1.1$  Hz, 1H), 4.34 (dt,  $J = 5.1, 1.2$  Hz, 2H), 2.95 – 2.75 (m, 3H), 2.61 (dd,  $J = 16.3, 10.5$  Hz, 1H), 2.45 (d,  $J = 10.4$  Hz, 1H), 2.03 – 1.93 (m, 1H), 1.64 – 1.49 (m, 1H), 1.03 (s, 18H).  $^{13}\text{C}\{^1\text{H}\}$  NMR (101 MHz,  $\text{CDCl}_3$ )  $\delta$  136.4, 136.2, 135.3, 129.1, 128.9, 128.1, 125.6, 125.5, 64.2, 36.8, 35.6, 29.3, 28.8, 27.5, 20.5. IR 3507, 2857, 1463,  $1099\text{ cm}^{-1}$ ; HRMS (APCI) calculated for  $\text{C}_{21}\text{H}_{33}\text{O}_2\text{Si}^-$  345.2250 Found 345.2248 ( $\text{M}^-$ ).

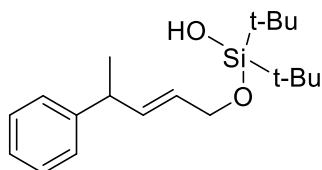

(*E*)-di-*tert*-butyl((4-phenylpent-2-en-1-yl)oxy)silanol

**Compound 25:** Purified using a gradient of 0 to 0.2% acetone/DCM; (light yellow oil, 320 mg, 50% yield);  $^1\text{H}$  NMR (400 MHz,  $\text{CDCl}_3$ )  $\delta$  7.41 – 7.27 (m, 3H), 7.22 (ddd,  $J = 7.2, 5.4, 3.0$  Hz, 2H), 5.90 (ddt,  $J = 15.4, 6.7, 1.5$  Hz, 1H), 5.62 (dtd,  $J = 15.4, 5.4, 1.4$  Hz, 1H), 4.36 (dt,  $J = 5.4, 1.3$  Hz, 2H), 3.51 (p,  $J = 7.0$  Hz, 1H), 1.40 (d,  $J = 7.1$  Hz, 3H), 1.04 (2 overlapping singlets, 18H).  $^{13}\text{C}\{^1\text{H}\}$  NMR (101 MHz,  $\text{CDCl}_3$ )  $\delta$  145.8, 135.6, 128.4, 128.2, 127.2, 126.1, 64.0, 41.8, 27.4, 21.2, 20.5. IR 3360, 2940, 1474, 1013,  $826\text{ cm}^{-1}$ . HRMS (ESI) calculated for  $\text{C}_{19}\text{H}_{32}\text{O}_2\text{SiNa}^+$  343.2064 Found 343.2042 ( $\text{MNa}^+$ ).

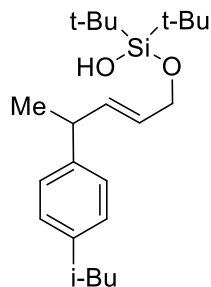

(*E*)-di-*tert*-butyl((4-(4-isobutylphenyl)pent-2-en-1-yl)oxy)silanol

**Compound 26:** Purified using a gradient of 0-10% EtOAc/Hexanes on silica gel; (white solid, 301 mg, 40% yield);  $^1\text{H}$  NMR (400 MHz, Chloroform-*d*)  $\delta$  7.12 (d,  $J$  = 8.2 Hz, 2H), 7.07 (d,  $J$  = 8.2 Hz, 2H), 5.86 (ddt,  $J$  = 15.4, 6.7, 1.5 Hz, 1H), 5.59 (dtd,  $J$  = 15.3, 5.4, 1.4 Hz, 1H), 4.33 (dt,  $J$  = 5.4, 1.3 Hz, 2H), 3.46 (p,  $J$  = 6.8 Hz, 1H), 2.45 (d,  $J$  = 7.2 Hz, 2H), 1.85 (m, 1H), 1.36 (d,  $J$  = 7.0 Hz, 3H), 1.03 (s, 9H), 1.01 (s, 9H), 0.90 (d,  $J$  = 6.6 Hz, 6H).;  $^{13}\text{C}\{^1\text{H}\}$  NMR (101 MHz, Chloroform-*d*)  $\delta$  143.0, 139.3, 136.0, 129.1, 128.0, 126.8, 64.1, 45.0, 41.4, 30.2, 27.8, 27.4, 22.3, 21.2, 20.4.; IR 3497, 2959, 1468, 1070, 826  $\text{cm}^{-1}$ . HRMS (ESI) calculated for  $\text{C}_{23}\text{H}_{39}\text{O}_2\text{Si}^-$  375.2719 found 375.2740 ( $\text{M}^-$ ).

### III. General Procedures for Formation of Ketone Organomercurial Products

**Protocol A:** A 5 mL microwave vial was charged with a stir bar,  $\text{CF}_3\text{CO}_2\text{Na}$  (0.15 mmol, 20 mg, 1.5 equiv.) and  $\text{Hg}(\text{OTf})_2$  (0.15 mmol, 75 mg, 1.5 equiv.). 1 mL of  $\text{NO}_2\text{Me}$  was added, and the reaction flask was cooled to 0 °C with an ice-water bath. Allylic silanol (0.1 mmol) was dissolved in 1 mL of  $\text{NO}_2\text{Me}$  and added to the reaction flask. Following addition, the flask was sealed, and the reaction was kept for 2h at 0°C with magnetic stirring. Following this period, the seal was broken, and 2 mL of brine (saturated aqueous NaCl) solution was slowly added. The heterogenous mixture was allowed to stir for 5 minutes and then transferred to a separatory funnel. An additional 10 mL of brine were added followed by 10 mL of  $\text{CH}_2\text{Cl}_2$ . The organic portion was collected, and the aqueous layer was extracted with two additional portions of  $\text{CH}_2\text{Cl}_2$ . The organic fractions were pooled, dried with  $\text{MgSO}_4$ , and concentrated under reduced pressure. The resulting residue was purified by chromatography on silica gel (specific conditions are associated with each compound).

**Protocol B:** A 5 mL microwave vial was charged with a stir bar,  $\text{CF}_3\text{CO}_2\text{Na}$  (0.15 mmol, 20 mg, 1.5 equiv.) and  $\text{Hg}(\text{OTf})_2$  (0.15 mmol, 75 mg, 1.5 equiv.). 1 mL of THF was added, and the reaction flask was cooled to 0 °C with an ice-water bath. Allylic silanol (0.1 mmol) was dissolved in 1 mL of THF and added to the reaction flask. Following addition, the flask was sealed, and the reaction warmed to room temperature over a period of 12h with magnetic stirring. Following this period, the seal was broken, and 2 mL of brine (saturated aqueous NaCl) solution was slowly added. The heterogenous mixture was allowed to stir for 5 minutes and then transferred to a separatory funnel. An additional 10 mL of brine were added followed by 10 mL of  $\text{CH}_2\text{Cl}_2$ . The organic portion was collected, and the aqueous layer was extracted with two additional portions of  $\text{CH}_2\text{Cl}_2$ . The organic fractions were pooled, dried with  $\text{MgSO}_4$ , and concentrated under reduced pressure. The resulting residue was purified by chromatography on silica gel (specific conditions are associated with each compound).

#### IV. Characterization of Ketone Organomercurial Products

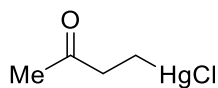

(3-oxobutyl)mercury(II) chloride

**Compound 27:** Synthesized using Protocol A; Purified using a gradient of 0 to 2% acetone/CH<sub>2</sub>Cl<sub>2</sub> on silica gel; (white solid, 21 mg, 70% yield); <sup>1</sup>H NMR (400 MHz, CDCl<sub>3</sub>) δ 2.98 (td, *J* = 6.7, 0.6 Hz, 2H), 2.20 (s, 3H), 1.70 (t, *J* = 6.7 Hz, 2H). <sup>13</sup>C{<sup>1</sup>H} NMR (101 MHz, CDCl<sub>3</sub>) δ 209.7, 41.7, 30.2, 20.7. IR 1704, 1651, 1361, 1174 cm<sup>-1</sup>.

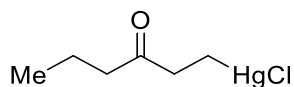

(3-oxohexyl)mercury(II) chloride

**Compound 28:** Synthesized using Protocol A; Purified using a gradient of 5 to 15% ethyl acetate/hexanes on silica gel; (white solid, 26 mg, 77% yield); <sup>1</sup>H NMR (400 MHz, CDCl<sub>3</sub>) δ 2.93 (t, *J* = 6.7 Hz, 2H), 2.42 (t, *J* = 7.3 Hz, 2H), 1.73 – 1.58 (m, 4H), 0.92 (t, *J* = 7.4 Hz, 3H). <sup>13</sup>C{<sup>1</sup>H} NMR (101 MHz, CDCl<sub>3</sub>) δ 212.1, 45.1, 40.7, 20.6, 17.5, 13.9. IR 1704, 1651, 1361, 1174 cm<sup>-1</sup>.

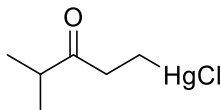

(4-methyl-3-oxopentyl)mercury(II) chloride

**Compound 29:** Synthesized using Protocol A; Purified using a gradient of 0 to 2% acetone/DCM on silica gel; (light yellow oil, 23 mg, 69% yield); <sup>1</sup>H NMR (400 MHz, CDCl<sub>3</sub>) δ 2.98 (t, *J* = 6.7 Hz, 2H), 2.67 – 2.58 (m, 1H), 1.71 (t, *J* = 6.7 Hz, 2H), 1.12 (dd, *J* = 7 Hz, 1.3 Hz, 6H). <sup>13</sup>C{<sup>1</sup>H} NMR (101 MHz, CDCl<sub>3</sub>) δ 215.8, 41.4, 38.4, 20.9, 18.5. IR 1699, 1487, 1057, 904 cm<sup>-1</sup>.

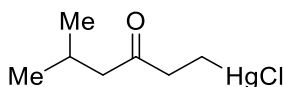

(5-methyl-3-oxohexyl)mercury(II) chloride

**Compound 30:** Synthesized using Protocol A; Purified using a gradient of 0 to 20% acetone/hexanes on silica gel; (light yellow oil, 30 mg, 85% yield); <sup>1</sup>H NMR (400 MHz, CDCl<sub>3</sub>) δ 2.94 (t, *J* = 6.7 Hz, 2H), 2.35 (d, *J* = 7.0 Hz, 2H), 2.24 – 2.12 (m, 1H), 1.72 (t, *J* = 6.7 Hz, 2H), 0.95 (d, *J* = 6.6 Hz, 6H). <sup>13</sup>C{<sup>1</sup>H} NMR (101 MHz, CDCl<sub>3</sub>) δ 211.6, 52.0, 41.1, 24.8, 22.6, 20.4. IR 2957, 1701, 1364 cm<sup>-1</sup>; HRMS (APCI) calculated for C<sub>7</sub>H<sub>14</sub>ClHgO<sup>+</sup> 351.0434 Found 350.0350 (M<sup>+</sup>).

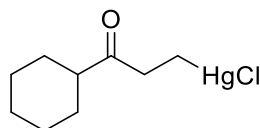

(3-cyclohexyl-3-oxopropyl)mercury(II) chloride



**Compound 31:** Synthesized using Protocol B; Purified using a gradient of 0 to 2% acetone/CH<sub>2</sub>Cl<sub>2</sub> on silica gel; (light yellow oil, 26 mg, 70% yield); <sup>1</sup>H NMR (400 MHz, CDCl<sub>3</sub>) δ 2.96 (t, *J* = 6.7 Hz, 2H), 2.35 (tt, *J* = 11.3, 3.5 Hz, 1H), 1.85 – 1.77 (m, 4H), 1.70 (d, *J* = 6.7 Hz, 2H), 1.41 – 1.19 (m, 6H). <sup>13</sup>C{<sup>1</sup>H} NMR (101 MHz, CDCl<sub>3</sub>) δ 215.1, 51.3, 38.7, 28.7, 25.9, 25.7, 20.8. IR 1665, 1540, 1147, 1064 cm<sup>-1</sup>. HRMS (APCI) calculated for C<sub>9</sub>H<sub>16</sub>ClHgO<sup>+</sup> 377.0596 Found 377.0604 (MH<sup>+</sup>).

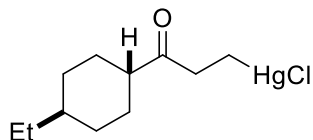

(3-(4-ethylcyclohexyl)-3-oxopropyl)mercury(II) chloride

**Compound 32:** Synthesized using Protocol B; Purified using a gradient of 0 to 1% acetone/CH<sub>2</sub>Cl<sub>2</sub> on silica gel; (white solid, 30 mg, 78% yield); <sup>1</sup>H NMR (400 MHz, CDCl<sub>3</sub>) δ 2.97 (t, *J* = 6.6 Hz, 2H), 2.30 (tt, *J* = 12.2, 3.3 Hz, 1H), 1.86 (ddq, *J* = 11.1, 6.3, 2.8 Hz, 4H), 1.69 (t, *J* = 6.7 Hz, 2H), 1.47 – 1.18 (m, 4H), 1.18 – 1.00 (m, 1H), 1.00 – 0.91 (m, 1H), 0.87 (t, *J* = 7.4 Hz, 4H). <sup>13</sup>C{<sup>1</sup>H} NMR (101 MHz, CDCl<sub>3</sub>) δ 210.7, 139.8, 131.8, 130.3, 120.2, 44.3, 41.2, 29.3, 20.6. IR 2930, 1698, 1540, 1103 cm<sup>-1</sup>.

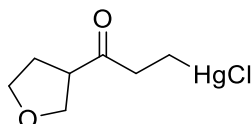

(3-oxo-3-(tetrahydrofuran-3-yl)propyl)mercury(II) chloride

**Compound 33:** Synthesized using Protocol B; Purified using a gradient of 0 to 0.2% MeOH/DCM on silica gel; (white semi-solid, 17 mg, 48% yield); <sup>1</sup>H NMR (400 MHz, Chloroform-*d*) δ 4.01 – 3.74 (m, 4H), 3.28–3.19 (m, 1H), 3.10–2.95 (m, 2H), 2.15–2.10 (m, 2H), 1.74 (t, *J* = 6.7 Hz, 2H). <sup>13</sup>C NMR (101 MHz, Chloroform-*d*) δ 211.2, 69.4, 68.3, 51.2, 40.1, 28.9, 20.6. IR 2870, 1471, 1732, 1153 cm<sup>-1</sup>. HRMS (APCI) calculated for C<sub>7</sub>H<sub>12</sub>ClHgO<sub>2</sub><sup>+</sup> 365.0232, Found 365.0273 (MH<sup>+</sup>).

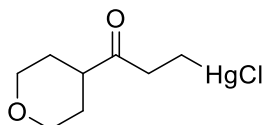

(3-oxo-3-(tetrahydro-2H-pyran-4-yl)propyl)mercury(II) chloride

**Compound 34:** Synthesized using Protocol B; Purified using a gradient of 0 to 2% acetone/CH<sub>2</sub>Cl<sub>2</sub> on silica gel; (light yellow oil, 18 mg, 50% yield); <sup>1</sup>H NMR (400 MHz, CDCl<sub>3</sub>) δ 4.01 (ddd, *J* = 11.4, 3.8, 2.5 Hz, 2H), 3.48 – 3.40 (m, 2H), 2.99 (t, *J* = 6.6 Hz, 2H), 2.60 – 2.53 (m, 1H), 1.76 – 1.68 (m, 6H). <sup>13</sup>C{<sup>1</sup>H} NMR (101 MHz, CDCl<sub>3</sub>) δ 213.0, 67.3, 48.1, 38.4, 28.4, 20.7. IR 2946, 2847, 1714, 1455 cm<sup>-1</sup>. HRMS (APCI) calculated for C<sub>8</sub>H<sub>14</sub>ClHgO<sup>+</sup> 379.0389 Found 379.0419 (MH<sup>+</sup>).

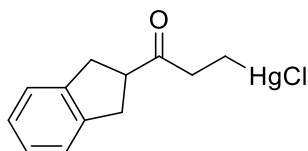

(3-(2,3-dihydro-1H-inden-2-yl)-3-oxopropyl)mercury(II) chloride

**Compound 35:** Synthesized using Protocol A; Purified using a gradient of 0 to 2% acetone/CH<sub>2</sub>Cl<sub>2</sub> on silica gel; (white solid, 28 mg, 70% yield); <sup>1</sup>H NMR (400 MHz, CDCl<sub>3</sub>) δ 7.22 – 7.16 (m, 4H), 3.45 (dd, *J* = 9.1, 8.0 Hz, 1H), 3.22 – 3.19 (m, 2H), 3.18 (d, *J* = 2.6 Hz, 2H), 3.07 (t, *J* = 6.7 Hz, 2H), 1.75 (t, *J* = 6.7 Hz, 2H). <sup>13</sup>C{<sup>1</sup>H} NMR (101 MHz, CDCl<sub>3</sub>) δ 212.7, 141.3, 126.9, 124.6, 51.6, 39.5, 35.4, 20.9. IR 2923, 2853, 1704, 1455, 1065 cm<sup>-1</sup>.

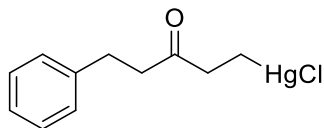

(3-oxo-5-phenylpentyl)mercury(II) chloride

**Compound 36:** Synthesized using Protocol B; Purified using a gradient of 0 to 2% acetone/CH<sub>2</sub>Cl<sub>2</sub> on silica gel; (colorless oil, 18 mg, 50% yield); <sup>1</sup>H NMR (400 MHz, CDCl<sub>3</sub>) δ 7.28 (dd, *J* = 7.2, 1.1 Hz, 2H), 7.22 – 7.15 (m, 3H), 2.96 – 2.84 (m, 4H), 2.77 (dd, *J* = 7.2, 0.8 Hz, 2H), 1.67 (t, *J* = 6.7 Hz, 2H). <sup>13</sup>C{<sup>1</sup>H} NMR (101 MHz, CDCl<sub>3</sub>) δ 211.2, 140.7, 128.8, 128.4, 126.5, 44.6, 41.2, 30.1, 20.6. IR 2930, 2857, 1717, 1488, 1003 cm<sup>-1</sup>.

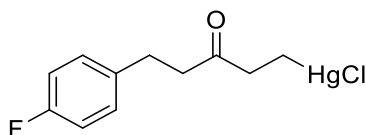

(5-(4-fluorophenyl)-3-oxopentyl)mercury(II) chloride

**Compound 37:** Synthesized using Protocol A; Purified using a gradient of 0 to 0.2% acetone/DCM on silica gel; (white solid, 22 mg, 58% yield); <sup>1</sup>H NMR (600 MHz, CDCl<sub>3</sub>) δ 7.09 – 7.03 (m, 2H), 6.94 – 6.87 (m, 2H), 2.86 – 2.78 (m, 4H), 2.67 (t, *J* = 7.5 Hz, 2H), 1.61 (t, *J* = 6.6 Hz, 2H). <sup>13</sup>C{<sup>1</sup>H} NMR (151 MHz, CDCl<sub>3</sub>) δ 210.8, 161.4 (d, *J* = 244.3 Hz), 136.2 (d, *J* = 3.0 Hz), 129.7 (d, *J* = 7.8 Hz), 115.4 (d, *J* = 21.4 Hz), 44.5, 41.0, 29.0, 20.4. IR 2929, 1701, 1507, 1404, 1079, 827 cm<sup>-1</sup>.

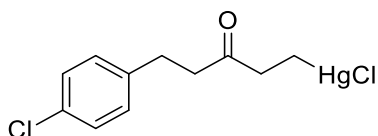

(5-(4-chlorophenyl)-3-oxopentyl)mercury(II) chloride

**Compound 38:** Synthesized using Protocol A; Purified using a gradient of 0 to 0.2% MeOH/DCM on silica gel; (white semi-solid, 21 mg, 49% yield); Purification 0 to 0.2% MeOH in dichloromethane under flash chromatography (White semi-solid, 49%); <sup>1</sup>H NMR (400 MHz, Chloroform-*d*) δ 7.23 (d, *J* = 8.4 Hz, 2H), 7.11 (d, *J* = 8.4 Hz, 2H), 2.93-2.86 (m, 4H), 2.75 (t, *J* = 7.4 Hz, 2H), 1.69 (t, *J* = 6.7 Hz, 2H). <sup>13</sup>C{<sup>1</sup>H} NMR (101 MHz, Chloroform-*d*) δ 210.6, 139.0, 132.0, 129.6, 128.7, 44.2, 41.0, 29.1, 20.4. IR 2856, 1455, 1704, 1091 cm<sup>-1</sup>.

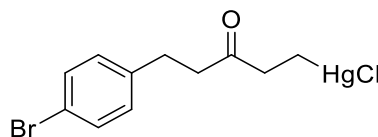

(5-(4-bromophenyl)-3-oxopentyl)mercury(II) chloride

**Compound 39:** Synthesized using Protocol A; Purified using a gradient of 0 to 1% acetone/CH<sub>2</sub>Cl<sub>2</sub> on silica gel; (white solid, 33 mg, 70% yield); <sup>1</sup>H NMR (400 MHz, CDCl<sub>3</sub>) δ 7.40 (d, *J* = 8.4 Hz, 2H), 7.05 (d, *J* = 8.3 Hz,

2H), 2.91 – 2.85 (m, 4H), 2.76 – 2.72 (m, 2H), 1.68 (t,  $J = 6.7$  Hz, 2H).  $^{13}\text{C}\{^1\text{H}\}$  NMR (101 MHz,  $\text{CDCl}_3$ )  $\delta$  210.7, 139.8, 131.8, 130.3, 120.2, 44.3, 41.1, 29.3, 20.6. IR 2931, 2860, 1704, 1071  $\text{cm}^{-1}$ .

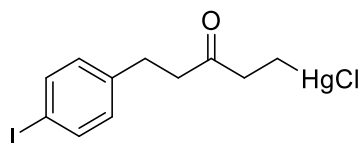

(5-(4-iodophenyl)-3-oxopentyl)mercury(II) chloride

**Compound 40:** Synthesized using Protocol A; Purified using a gradient of 0 to 0.2% acetone/ $\text{CH}_2\text{Cl}_2$  on silica gel; (white solid, 42 mg, 80% yield);  $^1\text{H}$  NMR (600 MHz,  $\text{CDCl}_3$ )  $\delta$  7.61 – 7.46 (m, 2H), 6.91 – 6.78 (m, 2H), 2.88 – 2.73 (m, 4H), 2.67 (t,  $J = 7.4$  Hz, 2H), 1.61 (t,  $J = 6.7$  Hz, 2H).  $^{13}\text{C}\{^1\text{H}\}$  NMR (151 MHz,  $\text{CDCl}_3$ )  $\delta$  210.6, 140.3, 137.6, 130.4, 91.4, 44.1, 41.0, 29.2, 20.5. IR 2934, 2860, 1695, 1507, 1364, 1004  $\text{cm}^{-1}$ ; HRMS (APCI) calculated for  $\text{C}_{11}\text{H}_{13}\text{ClHgIO}^+$  523.9328 Found 523.9285 ( $\text{M}^+$ ).

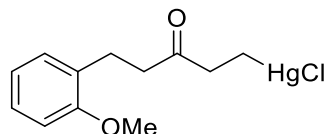

(5-(2-methoxyphenyl)-3-oxopentyl)mercury(II) chloride

**Compound 41:** Synthesized using Protocol B; Purified using a gradient of 0 to 0.2% MeOH/DCM on silica gel; (white semi-solid, 15 mg, 35% yield);  $^1\text{H}$  NMR (400 MHz, Chloroform- $d$ )  $\delta$  7.21 (td,  $J = 7.8, 1.8$  Hz, 1H), 7.12 (dd,  $J = 7.3, 1.8$  Hz, 1H), 6.94 – 6.81 (m, 2H), 3.83 (s, 3H), 2.94-2.87 (m, 4H), 2.76-2.72 (m, 2H), 1.68 (t,  $J = 6.7$  Hz, 2H).  $^{13}\text{C}$  NMR (101 MHz, Chloroform- $d$ )  $\delta$  211.60, 157.38, 130.02, 128.82, 127.69, 120.65, 110.35, 55.25, 42.87, 40.76, 25.31, 20.44. IR 2857, 1684, 1471  $\text{cm}^{-1}$ . HRMS (APCI) calculated for  $\text{C}_{12}\text{H}_{15}\text{ClHgO}_2^+$  428.0467, Found 428.0464 ( $\text{M}^+$ ).

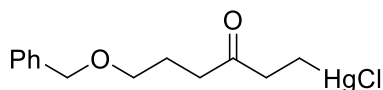

(6-(benzyloxy)-3-oxohexyl)mercury(II) chloride

**Compound 42:** Synthesized using Protocol B; Purified using a gradient of 0 to 1% acetone/ $\text{CH}_2\text{Cl}_2$  on silica gel; (light yellow oil, 26 mg, 60% yield);  $^1\text{H}$  NMR (400 MHz,  $\text{CDCl}_3$ )  $\delta$  7.44 – 7.30 (m, 5H), 4.49 (s, 2H), 3.52 (t,  $J = 5.9$  Hz, 2H), 2.93 (t,  $J = 6.7$  Hz, 2H), 2.57 (t,  $J = 7.1$  Hz, 2H), 2.01 – 1.89 (m, 2H), 1.65 (d,  $J = 6.7$  Hz, 2H).  $^{13}\text{C}\{^1\text{H}\}$  NMR (101 MHz,  $\text{CDCl}_3$ )  $\delta$  211.6, 138.2, 128.5, 127.8, 127.7, 72.9, 69.2, 40.6, 39.8, 24.1, 20.2. IR 3031, 2934, 1701, 1507, 1221, 742  $\text{cm}^{-1}$ .

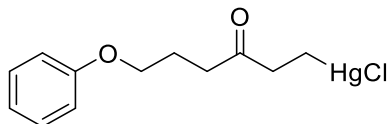

(3-oxo-6-phenoxyhexyl)mercury(II) chloride

**Compound 43:** Synthesized using general procedure B; Purified using a gradient of 0 to 3% acetone/DCM on silica gel; (colorless oil, 21 mg, 50% yield);  $^1\text{H}$  NMR (600 MHz,  $\text{CDCl}_3$ )  $\delta$  7.23 – 7.19 (m, 2H), 6.88 (tt,  $J =$

7.3, 1.1 Hz, 1H), 6.82 – 6.78 (m, 2H), 3.91 (t,  $J = 5.9$  Hz, 2H), 2.90 (t,  $J = 6.7$  Hz, 2H), 2.60 (t,  $J = 7.1$  Hz, 2H), 2.03 (tt,  $J = 7.1, 5.9$  Hz, 2H), 1.64 (t,  $J = 6.7$  Hz, 2H).  $^{13}\text{C}\{^1\text{H}\}$  NMR (151 MHz,  $\text{CDCl}_3$ )  $\delta$  211.2, 158.7, 129.5, 120.8, 114.4, 66.5, 40.7, 39.4, 23.4, 20.4. IR 293, 1701, 1598, 1495, 1039, 759  $\text{cm}^{-1}$ .

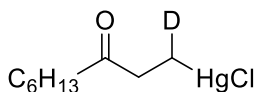

(3-oxononyl-1-*d*)mercury(II) chloride

**Compound 44:** Synthesized using general procedure A; purified using a gradient of 0 to 20% acetone/hexanes on silica gel; (light yellow solid, 80% yield);  $^1\text{H}$  NMR (600 MHz,  $\text{CDCl}_3$ )  $\delta$  2.96 (d,  $J = 6.7$  Hz, 2H), 2.46 (t,  $J = 7.5$  Hz, 2H), 1.74 – 1.68 (m, 1H), 1.65 – 1.58 (m, 2H), 1.36 – 1.25 (m, 6H), 0.91 (t,  $J = 6.9$  Hz, 3H).  $^{13}\text{C}\{^1\text{H}\}$  NMR (101 MHz,  $\text{CDCl}_3$ )  $\delta$  212.0, 43.1, 40.4, 31.5, 28.9, 23.8, 22.4, 20.5 – 19.7 (m), 14.0. IR 2951, 2860, 1707, 1467, 1267, 736  $\text{cm}^{-1}$ ; HRMS (APCI) calculated for  $\text{C}_9\text{H}_{15}\text{DClHgO}^-$  378.0664 Found 378.0665 (M $^-$ ).

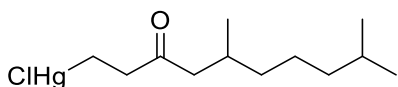

(5,9-dimethyl-3-oxodecyl)mercury(II) chloride

**Compound 45:** Synthesized using general procedure A; purified using a gradient of 0 to 20% acetone/hexanes on silica gel; (light yellow oil, 30 mg, 72% isolated yield);  $^1\text{H}$  NMR (400 MHz,  $\text{CDCl}_3$ )  $\delta$  2.94 (q,  $J = 6.4$  Hz, 2H), 2.44 (dd,  $J = 15.8, 5.7$  Hz, 1H), 2.27 (dd,  $J = 15.7, 8.1$  Hz, 1H), 2.09 – 1.97 (m, 1H), 1.72 (t,  $J = 6.7$  Hz, 2H), 1.54 (dp,  $J = 13.2, 6.6$  Hz, 1H), 1.35 – 1.21 (m, 3H), 1.21 – 1.12 (m, 3H), 0.98 – 0.76 (m, 9H).  $^{13}\text{C}\{^1\text{H}\}$  NMR (101 MHz,  $\text{CDCl}_3$ )  $\delta$  211.9, 50.5, 41.2, 39.0, 37.1, 29.5, 27.9, 24.7, 22.6, 22.5, 20.4, 19.9. IR 2951, 2929, 1701, 1461, 1141, 799  $\text{cm}^{-1}$ ; HRMS (APCI) calculated for  $\text{C}_{12}\text{H}_{22}\text{ClHgO}^-$  419.1071 Found 419.1076 (M $^-$ ).

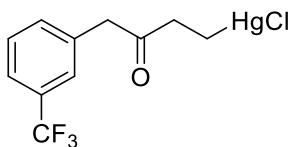

(3-oxo-4-(3-(trifluoromethyl)phenyl)butyl)mercury(II) chloride

**Compound 46:** Synthesized using general procedure B; Purified using a gradient of 0 to 20% acetone/hexanes on silica gel followed by preparative TLC (1% acetone/DCM); (light yellow oil, 19 mg, 42% yield);  $^1\text{H}$  NMR (400 MHz,  $\text{CDCl}_3$ )  $\delta$  7.64 – 7.57 (m, 1H), 7.58 – 7.46 (m, 2H), 7.46 – 7.40 (m, 1H), 3.83 (s, 2H), 3.06 (t,  $J = 6.7$  Hz, 2H), 1.73 (d,  $J = 6.7$  Hz, 2H).  $^{13}\text{C}\{^1\text{H}\}$  NMR (101 MHz,  $\text{CDCl}_3$ )  $\delta$  208.2, 134.4, 132.9, 131.1 (q,  $J = 32.3$  Hz), 129.2, 126.2 (q,  $J = 3.8$  Hz), 125.3 (q,  $J = 270$  Hz), 124.2 (q,  $J = 3.8$  Hz), 49.5, 40.5, 20.6. IR 2929, 1707, 1450, 1330, 1124, 805  $\text{cm}^{-1}$ ; HRMS (APCI) calculated for  $\text{C}_{11}\text{H}_{11}\text{ClF}_3\text{HgO}^+$  453.0157 Found 453.0190 (MH $^+$ ).

## V. Scale-Up Procedure for Formation of 27

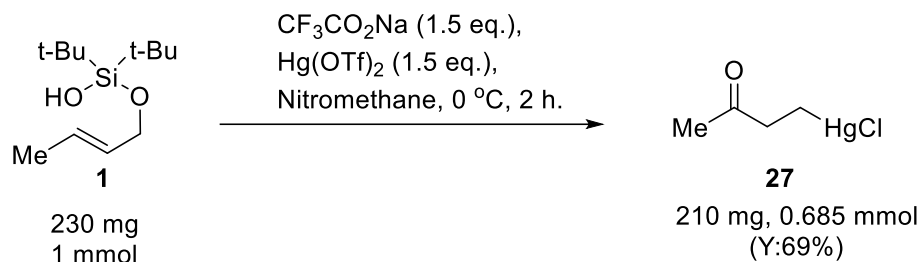

A 50 mL single-neck round-bottom flask was charged with **1** (230 mg, 1 mmol, 1 equiv.),  $\text{CF}_3\text{CO}_2\text{Na}$  (204 mg, 1.5 mmol, 1.5 equiv.), and nitromethane (20 mL). The flask was cooled to 0 °C in an ice-water bath, and  $\text{Hg}(\text{OTf})_2$  (750 mg, 1.5 mmol, 1.5 equiv.) was added in a single portion. The reaction mixture was stirred for 2 h at 0 °C. Then, the reaction was carefully quenched with brine (saturated aqueous NaCl) solution (20 mL) and stirred for 10 mins at 0 °C. The mixture was transferred to a separatory funnel. An additional 20 mL brine and DCM were added. The organic layer was separated, and then the aqueous layer was extracted with DCM (2 x 50 mL). The combined organic layers were washed with brine solution (50 mL), dried over anhydrous  $\text{MgSO}_4$ , filtered, and the solvent was removed *in vacuo*. The residue was purified using a gradient of 0 to 0.2% acetone/DCM (column chromatography, silica gel) to afford 210 mg (0.69 mmol, 69%) of **27** as a white solid.

## VI. Derivatization Reactions of Ketone Organomercurial Compounds

### a) Elimination

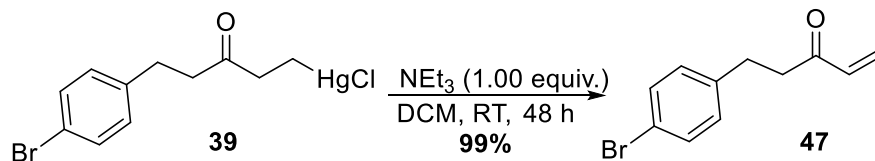

Triethylamine (3  $\mu\text{L}$ , 0.02 mmol, 1.00 equiv) was added to a solution of **39** (10 mg, 0.02 mmol) in 1.5 mL of DCM. After being stirred for 48 h, the mixture was diluted with dichloromethane, transferred to a separatory funnel, and washed with water. The organic layer was collected, dried over anhydrous  $\text{Na}_2\text{SO}_4$ , and concentrated under reduced pressure. The resulting residue was purified by chromatography on silica gel (gradient of 0 to 10% ethyl acetate in hexanes) to provide **47** (5 mg, 0.02 mmol, 99%) as an oil.

**Compound 47**:  $^1\text{H}$  NMR (400 MHz, Chloroform-*d*)  $\delta$  7.41 (d,  $J$  = 8.3 Hz, 2H), 7.09 (d,  $J$  = 8.3 Hz, 2H), 6.36 (dd,  $J$  = 17.7, 10.4 Hz, 1H), 6.22 (dd,  $J$  = 17.7, 1.1 Hz, 1H), 5.85 (dd,  $J$  = 10.5, 1.1 Hz, 1H), 2.93-2.90 (m, 4H).  $^{13}\text{C}$  NMR (101 MHz, Chloroform-*d*)  $\delta$  199.31, 140.05, 136.39, 131.54, 130.16, 128.40, 119.90, 40.88, 29.09. IR 2857, 1457, 1684, 1173  $\text{cm}^{-1}$ . HRMS (APCI) calculated for  $\text{C}_{11}\text{H}_{12}\text{BrO}^+$  239.0072, Found 239.0058 ( $\text{MH}^+$ ).

## b) Iodination

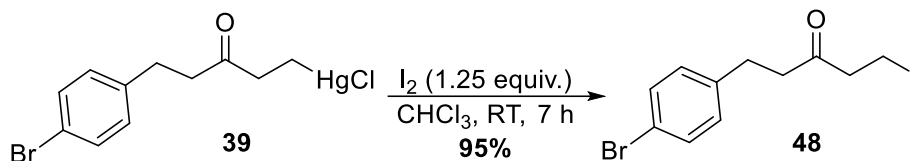

$I_2$  (13.3 mg, 0.05 mmol, 1.25 equiv.) was added to a solution of **39** (20 mg, 0.04 mmol, 1 equiv.) in  $CHCl_3$  (1.5 mL). After stirring for 7 h, the mixture was diluted with dichloromethane and quenched with saturated aqueous  $Na_2S_2O_3$  (2 mL) solution. In a separatory funnel, the organic layer was separated, collected, dried over anhydrous  $Na_2SO_4$ , and concentrated under reduced pressure to provide **48** (14.6 mg, 0.039 mmol, >95%) as a light-yellow solid, which was deemed pure without chromatography.

**Compound 48:**  $^1H$  NMR (400 MHz, Chloroform-*d*)  $\delta$  7.41 (d,  $J$  = 8.4 Hz, 2H), 7.07 (d,  $J$  = 8.4 Hz, 2H), 3.29 (t,  $J$  = 6.9 Hz, 2H), 3.06 (t,  $J$  = 6.9 Hz, 2H), 2.88 (t,  $J$  = 7.4 Hz, 2H), 2.73 (t,  $J$  = 7.6 Hz, 2H).  $^{13}C$  NMR (101 MHz, Chloroform-*d*)  $\delta$  206.74, 139.65, 131.59, 130.12, 120.01, 46.30, 44.12, 28.75, -4.77. IR 2857, 1457, 1730  $cm^{-1}$ . HRMS (APCI) calculated for  $C_{11}H_{13}BrIO^+$  366.9195, Found 366.9184 ( $MH^+$ ).

## c) Hydroxylation-Reduction

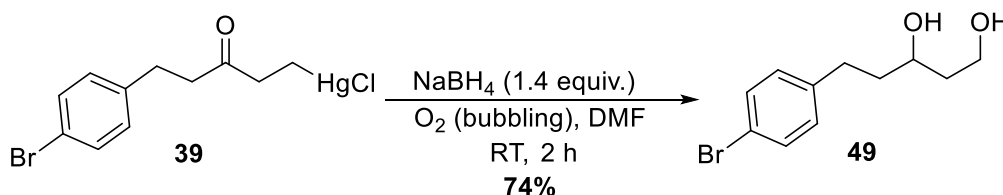

$NaBH_4$  (2.2 mg, 0.06 mmol, 1.4 equiv) was dissolved in DMF (0.5 mL), and the solution was sparged with  $O_2$  gas for 15 minutes. Following this time, a solution of **39** (20 mg, 0.04 mmol) in DMF (0.5 mL) was added dropwise. During and after addition,  $O_2$  gas was continuously bubbled. After 2 h at room temperature, the mixture was diluted with ethyl acetate, filtered through a pad of celite, transferred to a separatory funnel, and washed with water and brine. The organic layer was collected, dried over anhydrous  $MgSO_4$ , and concentrated under reduced pressure. The resulting residue was purified by chromatography on silica gel (gradient of 0 to 50% ethyl acetate in hexanes) to yield **49** (8 mg, 0.031 mmol, 74%) as a white semi-solid.

**Compound 49:**  $^1H$  NMR (400 MHz, Chloroform-*d*)  $\delta$  7.41 (d,  $J$  = 8.4 Hz, 2H), 7.09 (d,  $J$  = 8.3 Hz, 2H), 3.99 – 3.79 (m, 3H), 2.79–2.72 (m, 1H), 2.69 – 2.61 (m, 1H), 1.88 – 1.66 (m, 4H).  $^{13}C$  NMR (101 MHz, Chloroform-*d*)  $\delta$  140.9, 131.4, 130.2, 119.5, 71.3, 61.8, 39.1, 38.3, 31.2. IR 2926, 1455, 1002  $cm^{-1}$ . HRMS (ESI) calculated for  $C_{11}H_{14}BrO_2^-$  257.0177, Found 257.0180 ( $M^-$ ).

## VII. General Procedures for Formation of Cyclic Silanediol Organomercurial Products

**Protocol A:** A 5 mL microwave vial was charged with a stir bar, NaHCO<sub>3</sub> (0.1 mmol, 8 mg, 1 equiv.) and Hg(OTf)<sub>2</sub> (0.175 mmol, 93 mg, 1.75 equiv.). 1 mL of THF was added, and the reaction flask was cooled to 0 °C with an ice-water bath. Allylic silanol (0.1 mmol) was dissolved in 1 mL of THF and added to the reaction flask. Following addition, the flask was sealed, and the reaction was kept for 40 minutes at 0°C with magnetic stirring. Following this period, the seal was broken, and 2 mL of brine (saturated aqueous NaCl) solution was slowly added. The heterogenous mixture was allowed to stir for 5 minutes and then transferred to a separatory funnel. An additional 10 mL of brine were added followed by 10 mL of CH<sub>2</sub>Cl<sub>2</sub>. The organic portion was collected, and the aqueous layer was extracted with two additional portions of CH<sub>2</sub>Cl<sub>2</sub>. The organic fractions were pooled, dried with MgSO<sub>4</sub>, and concentrated under reduced pressure. The resulting residue was purified by chromatography on silica gel (specific conditions are associated with each compound).

**Protocol B:** A 5 mL microwave vial was charged with a stir bar, NaHCO<sub>3</sub> (0.1 mmol, 8 mg, 1 equiv.) and Hg(OTf)<sub>2</sub> (0.25 mmol, 125 mg, 2.5 equiv.). 1 mL of THF was added, and the reaction flask was cooled to 0 °C with an ice-water bath. Allylic silanol (0.1 mmol) was dissolved in 1 mL of THF and added to the reaction flask. Following addition, the flask was sealed, and the reaction was kept for 40 minutes at 0°C with magnetic stirring. Following this period, the seal was broken, and 2 mL of brine (saturated aqueous NaCl) solution was slowly added. The heterogenous mixture was allowed to stir for 5 minutes and then transferred to a separatory funnel. An additional 10 mL of brine were added followed by 10 mL of CH<sub>2</sub>Cl<sub>2</sub>. The organic portion was collected, and the aqueous layer was extracted with two additional portions of CH<sub>2</sub>Cl<sub>2</sub>. The organic fractions were pooled, dried with MgSO<sub>4</sub>, and concentrated under reduced pressure. The resulting residue was purified by chromatography on silica gel (specific conditions are associated with each compound).

**Protocol C:** A 5 mL microwave vial was charged with a stir bar, CF<sub>3</sub>CO<sub>2</sub>Na (0.15 mmol, 20 mg, 1.5 equiv.) and Hg(OTf)<sub>2</sub> (0.15 mmol, 75 mg, 1.5 equiv.). 1 mL of THF was added, and the reaction flask was cooled to 0 °C with an ice-water bath. Allylic silanol (0.1 mmol) was dissolved in 1 mL of THF and added to the reaction flask. Following addition, the flask was sealed, and the reaction was kept for 2h at 0°C with magnetic stirring. Following this period, the seal was broken, and 2 mL of brine (saturated aqueous NaCl) solution was slowly added. The heterogenous mixture was allowed to stir for 5 minutes and then transferred to a separatory funnel. An additional 10 mL of brine were added followed by 10 mL of CH<sub>2</sub>Cl<sub>2</sub>. The organic portion was collected, and the aqueous layer was extracted with two additional portions of CH<sub>2</sub>Cl<sub>2</sub>. The organic fractions were pooled, dried with MgSO<sub>4</sub>, and concentrated under reduced pressure. The resulting residue was purified by chromatography on silica gel (specific conditions are associated with each compound).

**Protocol D:** A 5 mL microwave vial was charged with a stir bar, NaHCO<sub>3</sub> (0.15 mmol, 13 mg, 1.5 equiv.) and Hg(OTf)<sub>2</sub> (0.15 mmol, 75 mg, 1.5 equiv.). 0.75 mL of THF was added, and the reaction flask was cooled to -40 °C with an ice-water bath. Allylic silanol (0.1 mmol) was dissolved in 0.75 mL of THF and added to the reaction flask. Following addition, the flask was sealed, and the reaction was kept for 16h at -40°C with magnetic stirring. Following this period, the flask was removed from the cooling bath and allowed to warm to room temperature over a period 6 hours. Following this period, the seal was broken, and 2 mL

of brine (saturated aqueous NaCl) solution was slowly added. The heterogenous mixture was allowed to stir for 5 minutes and then transferred to a separatory funnel. An additional 10 mL of brine were added followed by 10 mL of CH<sub>2</sub>Cl<sub>2</sub>. The organic portion was collected, and the aqueous layer was extracted with two additional portions of CH<sub>2</sub>Cl<sub>2</sub>. The organic fractions were pooled, dried with MgSO<sub>4</sub>, and concentrated under reduced pressure. The resulting residue was purified by chromatography on silica gel (specific conditions are associated with each compound).

### VIII. Characterization of Cyclic Silanediol Organomercurial Products

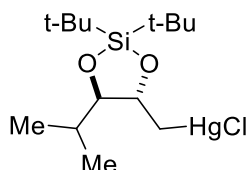

((2,2-di-*tert*-butyl-5-isopropyl-1,3,2-dioxasilolan-4-yl)methyl)mercury(II) chloride

**Compound 50:** Synthesized using Protocol A; Purified using a gradient of 0 to 20% EtOAc/hexanes on Florisil; single diastereomer; (light yellow oil, 32 mg, 66% yield); <sup>1</sup>H NMR (600 MHz, CDCl<sub>3</sub>) δ 4.16 (ddd, *J* = 8.3, 6.9, 4.5 Hz, 1H), 3.28 (dd, *J* = 8.4, 4.8 Hz, 1H), 2.41 (dd, *J* = 12.2, 4.5 Hz, 1H), 2.13 (dd, *J* = 12.2, 6.9 Hz, 1H), 1.74 (pd, *J* = 6.8, 4.9 Hz, 1H), 1.09 (s, 9H), 1.06 (s, 9H), 1.03 – 0.98 (m, 6H). <sup>13</sup>C{<sup>1</sup>H} NMR (126 MHz, CDCl<sub>3</sub>) δ 88.7, 76.9, 38.1, 31.6, 27.3, 27.1, 20.8, 20.7, 20.0, 17.7. IR 2944, 2857, 1473, 1366, 993 cm<sup>-1</sup>.; HRMS (ESI) calculated for C<sub>14</sub>H<sub>30</sub>ClHgO<sub>2</sub>Si<sup>+</sup> 495.1410 Found 495.1420 (MH<sup>+</sup>).

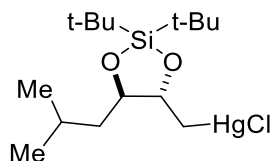

((2,2-di-*tert*-butyl-5-isobutyl-1,3,2-dioxasilolan-4-yl)methyl)mercury(II) chloride

**Compound 51:** Synthesized using Protocol A; Purified using a gradient of 0 to 30% EtOAc/hexanes on silica gel; single diastereomer; (light yellow oil, 24 mg, 48% yield); <sup>1</sup>H NMR (400 MHz, CDCl<sub>3</sub>) δ 4.00 (ddd, *J* = 8.4, 6.1, 4.9 Hz, 1H), 3.51 (ddd, *J* = 9.6, 8.4, 2.7 Hz, 1H), 2.40 (dd, *J* = 12.2, 4.9 Hz, 1H), 2.09 (dd, *J* = 12.2, 6.1 Hz, 1H), 1.93 (dpd, *J* = 8.7, 6.7, 5.1 Hz, 1H), 1.46 (ddd, *J* = 13.7, 9.6, 5.1 Hz, 1H), 1.24 (ddd, *J* = 13.8, 8.7, 2.7 Hz, 1H), 1.09 (s, 9H), 1.05 (s, 9H), 1.02 – 0.97 (m, 3H), 0.96 (d, *J* = 6.6 Hz, 3H). <sup>13</sup>C{<sup>1</sup>H} NMR (101 MHz, CDCl<sub>3</sub>) δ 82.3, 79.6, 43.8, 36.8, 27.3, 27.0, 25.2, 23.5, 22.0, 20.7, 20.5. IR 2968, 2851, 1473, 1076, 1003 cm<sup>-1</sup>.; HRMS (ESI) calculated for C<sub>15</sub>H<sub>32</sub>ClHgO<sub>2</sub>Si<sup>+</sup> 509.1566 Found 509.1577 (MH<sup>+</sup>).



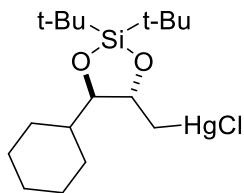

((2,2-di-*tert*-butyl-5-cyclohexyl-1,3,2-dioxasilolan-4-yl)methyl)mercury(II) chloride

**Compound 52:** Synthesized using Protocol A; Purified using a gradient of 0 to 20% EtOAc/hexanes on Florisil; single diastereomer; (light yellow oil, 43 mg, 80% yield);  $^1\text{H}$  NMR (600 MHz,  $\text{CDCl}_3$ )  $\delta$  4.25 – 4.17 (m, 1H), 3.27 (dd,  $J = 8.4, 4.8$  Hz, 1H), 2.41 (dd,  $J = 12.2, 4.5$  Hz, 1H), 2.13 (dd,  $J = 12.2, 6.8$  Hz, 1H), 1.89 – 1.76 (m, 3H), 1.71-1.68 (m, 1H), 1.65-1.59 (m, 1H), 1.46 – 1.37 (m, 1H), 1.35 – 1.14 (m, 5H), 1.08 (s, 9H), 1.05 (s, 9H).  $^{13}\text{C}\{^1\text{H}\}$  NMR (126 MHz,  $\text{CDCl}_3$ )  $\delta$  88.3, 76.4, 41.5, 38.2, 30.3, 28.2, 27.3, 27.1, 26.3, 26.1, 20.8, 20.6. IR 2941, 2854, 1473, 1076  $\text{cm}^{-1}$ ; HRMS (ESI) calculated for  $\text{C}_{17}\text{H}_{34}\text{ClHgO}_2\text{Si}^+$  535.1723 Found 535.1736 ( $\text{MH}^+$ ).

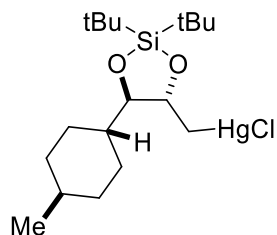

((2,2-di-*tert*-butyl-5-((1*r*,4*R*)-4-methylcyclohexyl)-1,3,2-dioxasilolan-4-yl)methyl)mercury(II) chloride

**Compound 53:** Synthesized using Protocol A; Purified using a gradient of 0 to 20% EtOAc/hexanes on Florisil; Single diastereomer; (light yellow oil, 32 mg, 58% yield);  $^1\text{H}$  NMR (600 MHz,  $\text{CDCl}_3$ )  $\delta$  4.21 (ddd,  $J = 8.4, 6.8, 4.6$  Hz, 1H), 3.28 (dd,  $J = 8.4, 4.7$  Hz, 1H), 2.41 (dd,  $J = 12.2, 4.5$  Hz, 1H), 2.13 (dd,  $J = 12.2, 6.8$  Hz, 1H), 1.85 (dt,  $J = 13.0, 3.0$  Hz, 1H), 1.78 (m, 2H), 1.62 (dt,  $J = 12.4, 2.9$  Hz, 1H), 1.35 (ddt,  $J = 15.1, 7.9, 3.3$  Hz, 2H), 1.31 – 1.25 (m, 2H), 1.25 – 1.16 (m, 1H), 1.08 (s, 9H), 1.05 (s, 9H), 0.90 (m, 4H).  $^{13}\text{C}$  NMR (126 MHz,  $\text{CDCl}_3$ )  $\delta$  88.2, 76.5, 41.2, 38.2, 35.0, 34.8, 32.5, 30.2, 28.0, 27.3, 27.1, 22.6, 20.8, 20.6. IR 2929, 2860, 1474, 1000  $\text{cm}^{-1}$ ; HRMS (ESI) calculated for  $\text{C}_{18}\text{H}_{36}\text{ClHgO}_2\text{Si}^+$  549.1879 Found 549.1898 ( $\text{MH}^+$ ).

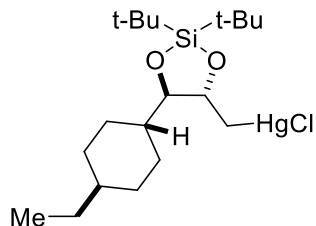

((2,2-di-*tert*-butyl-5-((1*r*,4*R*)-4-ethylcyclohexyl)-1,3,2-dioxasilolan-4-yl)methyl)mercury(II) chloride

**Compound 54:** Synthesized using Protocol A; Purified using a gradient of 0 to 30% EtOAc/hexanes on silica gel; Single diastereomer; (light yellow oil, 40 mg, 70% yield);  $^1\text{H}$  NMR (400 MHz,  $\text{CDCl}_3$ )  $\delta$  4.21 (ddd,  $J = 8.4, 6.8, 4.5$  Hz, 1H), 3.28 (dd,  $J = 8.4, 4.6$  Hz, 1H), 2.41 (dd,  $J = 12.2, 4.5$  Hz, 1H), 2.13 (dd,  $J = 12.2, 6.8$  Hz, 1H), 1.85 (tdd,  $J = 12.3, 5.4, 3.0$  Hz, 3H), 1.65 (dt,  $J = 12.2, 2.7$  Hz, 1H), 1.37 (tdd,  $J = 10.7, 8.5, 3.8$  Hz, 1H), 1.31

– 1.11 (m, 5H), 1.08 (s, 9H), 1.05 (s, 9H), 0.94 – 0.86 (m, 5H).  $^{13}\text{C}\{^1\text{H}\}$  NMR (101 MHz,  $\text{CDCl}_3$ )  $\delta$  88.2, 76.5, 41.7, 39.3, 38.2, 32.6, 32.4, 30.2, 29.9, 28.0, 27.3, 27.1, 20.8, 20.6, 11.5. IR 2935, 2854, 1471, 1076, 926  $\text{cm}^{-1}$ ; HRMS (APCI) calculated for  $\text{C}_{19}\text{H}_{37}\text{ClHgO}_2\text{Si}^+$  562.1958 Found 562.1995 ( $\text{M}^+$ ).

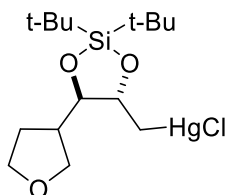

((2,2-di-*tert*-butyl-5-(tetrahydrofuran-3-yl)-1,3,2-dioxasilolan-4-yl)methyl)mercury(II) chloride

**Compound 55:** Synthesized using Protocol A; Purified using a gradient of 0 to 100% EtOAc/hexanes on silica gel; single diastereomer; (light yellow oil, 21 mg, 40% yield);  $^1\text{H}$  NMR (600 MHz,  $\text{CDCl}_3$ )  $\delta$  4.11 (tt,  $J = 7.7, 4.5$  Hz, 1H), 3.99 (t,  $J = 8.2$  Hz, 1H), 3.93 (qd,  $J = 7.6, 3.7$  Hz, 1H), 3.80 (td,  $J = 8.3, 6.9$  Hz, 1H), 3.75 (t,  $J = 8.3$  Hz, 1H), 3.50 (t,  $J = 7.7$  Hz, 1H), 2.41 (dd,  $J = 12.2, 4.3$  Hz, 1H), 2.35 (h,  $J = 7.9$  Hz, 1H), 2.15 (dd,  $J = 12.2, 7.3$  Hz, 1H), 1.97 (dtd,  $J = 11.9, 7.5, 3.9$  Hz, 1H), 1.74 (dq,  $J = 11.9, 8.5$  Hz, 1H), 1.08 (s, 9H), 1.05 (s, 9H).  $^{13}\text{C}\{^1\text{H}\}$  NMR (126 MHz,  $\text{CDCl}_3$ )  $\delta$  85.85, 78.75, 70.54, 68.34, 43.72, 37.63, 29.10, 27.23, 27.03, 20.79, 20.63. IR 2960, 2938, 1474, 1030  $\text{cm}^{-1}$ ; HRMS (ESI) calculated for  $\text{C}_{15}\text{H}_{30}\text{ClHgO}_3\text{Si}^+$  523.1359 Found 523.1383 ( $\text{MH}^+$ ).

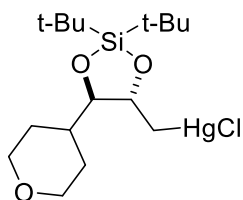

((2,2-di-*tert*-butyl-5-(tetrahydro-2*H*-pyran-4-yl)-1,3,2-dioxasilolan-4-yl)methyl)mercury(II) chloride

**Compound 56:** Synthesized using Protocol B; Purified using a gradient of 0 to 50% EtOAc/hexanes on silica gel; single diastereomer; (Colorless oil, 24 mg, 45% yield);  $^1\text{H}$  NMR (600 MHz,  $\text{CDCl}_3$ )  $\delta$  4.19 (td,  $J = 7.7, 4.4$  Hz, 1H), 4.04 (dt,  $J = 10.7, 5.5$  Hz, 2H), 3.40 (tdd,  $J = 11.7, 7.3, 2.3$  Hz, 2H), 3.30 (dd,  $J = 8.4, 4.7$  Hz, 1H), 2.39 (dd,  $J = 12.2, 4.4$  Hz, 1H), 2.12 (dd,  $J = 12.2, 7.2$  Hz, 1H), 1.76 – 1.71 (m, 1H), 1.69 – 1.56 (m, 3H), 1.48 (dt,  $J = 11.8, 2.3$  Hz, 1H), 1.08 (s, 9H), 1.05 (s, 9H).  $^{13}\text{C}\{^1\text{H}\}$  NMR (101 MHz,  $\text{CDCl}_3$ )  $\delta$  87.4, 76.4, 67.9, 67.7, 39.2, 38.0, 29.9, 28.5, 27.2, 27.0, 20.8, 20.6. IR 2932, 2857, 1473, 1086, 1002  $\text{cm}^{-1}$ ; HRMS (ESI) calculated for  $\text{C}_{16}\text{H}_{32}\text{ClHgO}_3\text{Si}^+$  537.1516 Found 537.1526 ( $\text{MH}^+$ ).

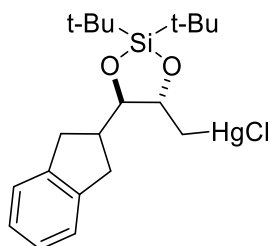

((2,2-di-*tert*-butyl-5-(2,3-dihydro-1*H*-inden-2-yl)-1,3,2-dioxasilolan-4-yl)methyl)mercury(II) chloride

**Compound 57:** Synthesized using Protocol B; Purified using a gradient of 0 to 30% EtOAc/hexanes; single diastereomer; (white solid, 27 mg, 48% yield);  $^1\text{H}$  NMR (400 MHz,  $\text{CDCl}_3$ )  $\delta$  7.27 – 7.20 (m, 2H), 7.20 – 7.15 (m, 2H), 4.20 (ddd,  $J = 8.3, 6.9, 4.4$  Hz, 1H), 3.65 (dd,  $J = 8.4, 5.8$  Hz, 1H), 3.04 (dd,  $J = 8.8, 6.7$  Hz, 2H), 2.94 (d,  $J = 9.0$  Hz, 2H), 2.67 – 2.56 (m, 1H), 2.46 (dd,  $J = 12.2, 4.4$  Hz, 1H), 2.18 (dd,  $J = 12.2, 7.0$  Hz, 1H), 1.11 (s, 9H), 1.08 (s, 9H).  $^{13}\text{C}\{^1\text{H}\}$  NMR (101 MHz,  $\text{CDCl}_3$ )  $\delta$  142.8, 142.5, 126.3, 126.2, 124.4, 124.2, 86.4, 78.2, 44.3, 37.5, 35.9, 34.8, 27.3, 27.1, 20.8, 20.7. IR 2941, 2860, 1470, 1364, 1065  $\text{cm}^{-1}$ ; HRMS (ESI) calculated for  $\text{C}_{20}\text{H}_{32}\text{ClHgO}_2\text{Si}^+$  569.1566 Found 569.1544 ( $\text{MH}^+$ ).

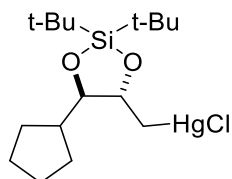

((2,2-di-*tert*-butyl-5-cyclopentyl-1,3,2-dioxasilolan-4-yl)methyl)mercury(II) chloride

**Compound 58:** Synthesized using Protocol A; Purified using a gradient of 0 to 30% EtOAc/hexanes on silica gel; single diastereomer; (colorless oil, 29 mg, 57% yield);  $^1\text{H}$  NMR (400 MHz,  $\text{CDCl}_3$ )  $\delta$  4.13 (ddd,  $J = 8.4, 6.6, 4.5$  Hz, 1H), 3.42 (dd,  $J = 8.4, 5.6$  Hz, 1H), 2.43 (dd,  $J = 12.2, 4.5$  Hz, 1H), 2.15 (dd,  $J = 12.2, 6.6$  Hz, 1H), 1.96 – 1.84 (m, 1H), 1.79 – 1.63 (m, 4H), 1.62 – 1.47 (m, 3H), 1.43 – 1.32 (m, 1H), 1.09 (s, 9H), 1.06 (s, 9H).  $^{13}\text{C}\{^1\text{H}\}$  NMR (101 MHz,  $\text{CDCl}_3$ )  $\delta$  87.3, 78.4, 43.8, 37.6, 29.6, 28.1, 27.3, 27.1, 25.4, 25.1, 20.8, 20.6. IR 2974, 2869, 1471, 1364, 1007  $\text{cm}^{-1}$ ; HRMS (ESI) calculated for  $\text{C}_{16}\text{H}_{32}\text{ClHgO}_2\text{Si}^+$  521.1566 Found 521.1568 ( $\text{MH}^+$ ).

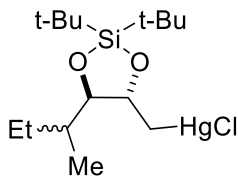

((5-(*sec*-butyl)-2,2-di-*tert*-butyl-1,3,2-dioxasilolan-4-yl)methyl)mercury(II) chloride

**Compound 59:** Synthesized using Protocol B; Purified using a gradient of 0 to 30% EtOAc/hexanes on silica gel; 1.5:1 mixture of diastereomers; (light yellow oil, 37 mg, 72% yield);  $^1\text{H}$  NMR (400 MHz,  $\text{CDCl}_3$ ) (Note: for major diastereomer)  $\delta$  4.18 (ddd,  $J = 8.3, 7.2, 4.4$  Hz, 1H), 3.34 (dd,  $J = 8.2, 5.8$  Hz, 1H), 2.41 (dd,  $J = 12.2, 4.4$  Hz, 1H), 2.16 (dd,  $J = 12.2, 7.3$  Hz, 1H), 1.65 (dtd,  $J = 15.0, 7.5, 3.4$  Hz, 1H), 1.54 (dtd,  $J = 9.4, 6.2, 3.2$  Hz, 1H), 1.35-1.25 (m, 1H), 1.09 (s, 9H), 1.07 – 1.02 (m, 9H), 0.99 – 0.90 (m, 6H).;  $^{13}\text{C}\{^1\text{H}\}$  NMR (101 MHz,  $\text{CDCl}_3$ ) (Note: for mixture of diastereomers)  $\delta$  88.2, 86.6, 77.0, 76.2, 38.8, 38.5, 37.4, 37.3, 27.33, 27.30, 27.2, 27.1, 24.9, 20.9, 20.8, 20.7, 20.6, 15.8, 13.8, 11.8, 11.4. IR 2965, 2866, 1473, 1364, 984  $\text{cm}^{-1}$ ; HRMS (ESI) calculated for  $\text{C}_{15}\text{H}_{32}\text{ClHgO}_2\text{Si}^+$  509.1566 Found 509.1566 ( $\text{MH}^+$ ).

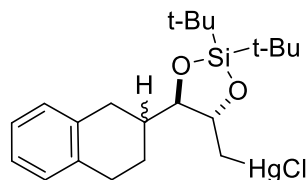

((2,2-di-*tert*-butyl-5-(1,2,3,4-tetrahydronaphthalen-2-yl)-1,3,2-dioxasilolan-4-yl)methyl)mercury(II) chloride

**Compound 60:** Purified using a gradient of 0 to 30% EtOAc/hexanes on silica gel; (colorless oil, 29 mg, 50% yield);  $^1\text{H}$  NMR (400 MHz,  $\text{CDCl}_3$ )  $\delta$  7.10 (q,  $J = 4.3$  Hz, 4H), 4.30 (td,  $J = 7.6, 4.4$  Hz, 1H), 3.45 (dt,  $J = 8.7, 4.7$  Hz, 1H), 2.96 – 2.66 (m, 4H), 2.43 (dd,  $J = 12.2, 4.4$  Hz, 1H), 2.22 – 2.04 (m, 1H), 1.94 – 1.78 (m, 2H), 1.76 – 1.58 (m, 1H), 1.08 (d,  $J = 0.9$  Hz, 9H), 1.05 (d,  $J = 1.4$  Hz, 9H).  $^{13}\text{C}\{^1\text{H}\}$  NMR (126 MHz,  $\text{CDCl}_3$ )  $\delta$  136.6, 136.2, 136.1, 135.8, 129.3, 129.1, 128.8, 128.7, 125.8, 125.7, 125.6, 87.9, 87.0, 76.8, 38.5, 38.4, 38.1, 33.3, 31.2, 29.2, 29.0, 27.3, 27.1, 27.0, 24.7, 20.8, 20.7. IR 2932, 2869, 1471, 1064, 1000  $\text{cm}^{-1}$ ; HRMS (ESI) calculated for  $\text{C}_{21}\text{H}_{34}\text{ClHgO}_2\text{Si}^+$  583.1723 Found 583.1740 ( $\text{MH}^+$ ).

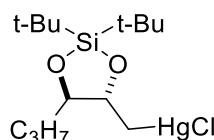

((2,2-di-*tert*-butyl-5-propyl-1,3,2-dioxasilolan-4-yl)methyl)mercury(II) chloride

**Compound 61:** Synthesized using general procedure C; purified using a gradient of 0 to 30% EtOAc/hexanes on silica gel; single diastereomer; (light white solid, 25 mg, 50% yield);  $^1\text{H}$  NMR (400 MHz,  $\text{CDCl}_3$ )  $\delta$  4.06 (ddd,  $J = 8.5, 6.1, 4.8$  Hz, 1H), 3.48 (ddd,  $J = 8.6, 6.8, 4.3$  Hz, 1H), 2.41 (dd,  $J = 12.2, 4.8$  Hz, 1H), 2.10 (dd,  $J = 12.2, 6.1$  Hz, 1H), 1.66 – 1.42 (m, 4H), 1.08 (d,  $J = 14.1$  Hz, 18H), 1.01 – 0.93 (m, 3H).  $^{13}\text{C}\{^1\text{H}\}$  NMR (101 MHz,  $\text{CDCl}_3$ )  $\delta$  83.8, 79.1, 37.0, 36.7, 27.3, 27.0, 20.7, 20.5, 19.2, 14.1. IR 2962, 2860, 2364, 1473  $\text{cm}^{-1}$ ; HRMS (ESI) calculated for  $\text{C}_{14}\text{H}_{30}\text{ClHgO}_2\text{Si}^+$  495.1410 Found 495.1422 ( $\text{MH}^+$ ).

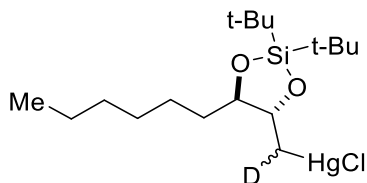

((2,2-di-*tert*-butyl-5-hexyl-1,3,2-dioxasilolan-4-yl)methyl-*d*)mercury(II) chloride

**Compound 62:** Synthesized using Protocol C; purified using a gradient of 0 to 30% EtOAc/hexanes on silica gel; 1:1 mixture of diastereomers; (colorless oil, 19 mg, 35% yield);  $^1\text{H}$  NMR (400 MHz,  $\text{CDCl}_3$ ) (mixture of diastereomers)  $\delta$  4.10 – 3.99 (m, 2H), 3.46 (dq,  $J = 8.4, 3.4$  Hz, 2H), 2.39 (d,  $J = 4.7$  Hz, 1H), 2.09 (d,  $J = 6.1$  Hz, 1H), 1.63 – 1.29 (m, 20H), 1.09 (s, 18H), 1.06 (s, 18H), 0.95 – 0.90 (m, 6H).  $^{13}\text{C}\{^1\text{H}\}$  NMR (101 MHz,  $\text{CDCl}_3$ )  $\delta$  84.1, 79.1, 37.0 – 36.5 (m), 34.6, 31.7, 29.3, 27.3, 27.0, 25.9, 22.6, 20.7, 20.5, 14.0. IR 2938, 2884, 1470, 1028  $\text{cm}^{-1}$ ; HRMS (ESI) calculated for  $\text{C}_{17}\text{H}_{35}\text{DClHgO}_2\text{Si}^+$  538.1942 Found 538.1953 ( $\text{MH}^+$ ).

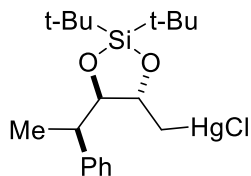

((2,2-di-*tert*-butyl-5-1-phenylethyl)-1,3,2-dioxasilolan-4-yl)methylmercury(II) chloride

**Compound 63:** Synthesized using Protocol D; Purified using a gradient of 0 to 30% EtOAc/hexanes on silica gel; single diastereomer, relative stereochemistry determined through X-ray diffraction (CCDC: 2084035); (white solid, 27 mg, 49% yield);  $^1\text{H}$  NMR (400 MHz,  $\text{CDCl}_3$ )  $\delta$  7.35 – 7.27 (m, 2H), 7.27 – 7.21 (m, 3H), 3.96 (ddd,  $J = 8.8, 6.3, 4.5$  Hz, 1H), 3.63 (dd,  $J = 8.8, 3.4$  Hz, 1H), 2.98 (qd,  $J = 7.2, 3.4$  Hz, 1H), 2.27 (dd,  $J = 12.2, 4.5$  Hz, 1H), 2.01 (dd,  $J = 12.2, 6.3$  Hz, 1H), 1.48 (d,  $J = 7.2$  Hz, 3H), 1.08 (s, 9H), 0.83 (s, 9H).  $^{13}\text{C}\{^1\text{H}\}$  NMR (101 MHz,  $\text{CDCl}_3$ )  $\delta$  141.4, 129.0, 128.1, 126.7, 87.5, 75.8, 41.8, 37.0, 27.2, 26.7, 20.8, 20.6, 18.1. IR 2938, 2857, 1468, 1080, 997  $\text{cm}^{-1}$ ; HRMS (ESI) calculated for  $\text{C}_{19}\text{H}_{32}\text{ClHgO}_2\text{Si}^+$  557.1566 Found 557.1585 ( $\text{MH}^+$ ).

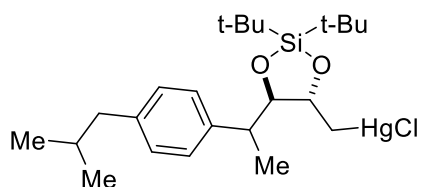

((2,2-di-*tert*-butyl-5-(1-(4-isobutylphenyl)ethyl)-1,3,2-dioxasilolan-4-yl)methylmercury(II) chloride

**Compound 64:** Synthesized using Protocol D; Purified using a gradient of 0 to 30% EtOAc/hexanes on silica gel; single diastereomer; (light yellow oil, 29 mg, 48% yield);  $^1\text{H}$  NMR (400 MHz,  $\text{CDCl}_3$ )  $\delta$  7.18 – 7.13 (m, 2H), 7.11 – 7.06 (m, 2H), 3.95 (ddd,  $J = 8.9, 6.2, 4.5$  Hz, 1H), 3.61 (dd,  $J = 8.9, 3.0$  Hz, 1H), 2.96 (qd,  $J = 7.2, 3.0$  Hz, 1H), 2.47 (d,  $J = 7.1$  Hz, 2H), 2.27 (dd,  $J = 12.2, 4.5$  Hz, 1H), 2.01 (dd,  $J = 12.2, 6.2$  Hz, 1H), 1.85 (dq,  $J = 13.5, 6.7$  Hz, 1H), 1.48 (d,  $J = 7.2$  Hz, 3H), 1.08 (s, 9H), 0.91 (d,  $J = 6.6$  Hz, 6H), 0.80 (s, 9H).  $^{13}\text{C}\{^1\text{H}\}$  NMR (101 MHz,  $\text{CDCl}_3$ )  $\delta$  140.1, 138.3, 128.9, 128.8, 87.6, 75.6, 45.0, 41.2, 36.9, 30.2, 27.2, 26.7, 22.5, 22.4, 20.8, 20.6, 18.1. IR 2962, 2863, 1471, 1364, 977  $\text{cm}^{-1}$ ; HRMS (ESI) calculated for  $\text{C}_{23}\text{H}_{40}\text{ClHgO}_2\text{Si}^+$  613.2192 Found 613.2191 ( $\text{MH}^+$ ).

## IX. Crystallographic Information for Compound 63 (CCDC 2084035)

Crystals suitable for X-ray diffraction grown from Ethanol.

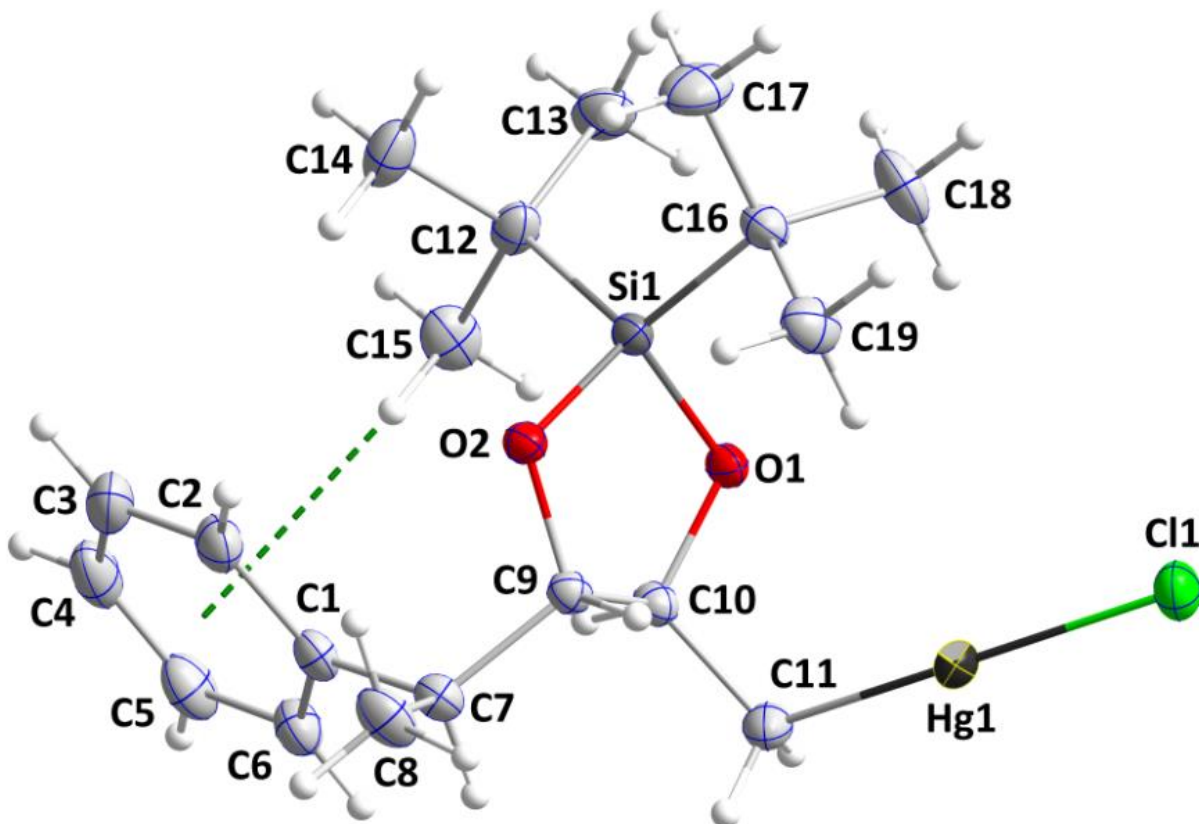

Note: Ellipsoid contour probability levels are 50%.

### Crystal Structure Report for JTM1445

Table 1: Data collection details for JTM1445.

| Axis  | dx/mm  | 2 $\theta$ / $^{\circ}$ | $\omega$ / $^{\circ}$ | $\varphi$ / $^{\circ}$ | $\chi$ / $^{\circ}$ | Width/ $^{\circ}$ | Frames | Time/s | Wavelength/ $\text{\AA}$ | Voltage/kV | Current/mA | Temperature/K |
|-------|--------|-------------------------|-----------------------|------------------------|---------------------|-------------------|--------|--------|--------------------------|------------|------------|---------------|
| Omega | 50.706 | 17.64                   | -161.79               | 153.00                 | 54.81               | 0.50              | 358    | 7.50   | 0.71076                  | 50         | 30.0       | n/a           |
| Omega | 50.706 | 17.64                   | -161.79               | -105.00                | 54.81               | 0.50              | 358    | 7.50   | 0.71076                  | 50         | 30.0       | n/a           |
| Omega | 50.706 | 17.64                   | -161.79               | 102.00                 | 54.81               | 0.50              | 358    | 7.50   | 0.71076                  | 50         | 30.0       | n/a           |
| Omega | 50.706 | 17.64                   | -161.79               | -156.00                | 54.81               | 0.50              | 358    | 7.50   | 0.71076                  | 50         | 30.0       | n/a           |
| Omega | 50.706 | 26.47                   | -152.97               | 0.00                   | 54.81               | 0.50              | 358    | 7.50   | 0.71076                  | 50         | 30.0       | n/a           |
| Omega | 50.706 | 17.64                   | -161.79               | 51.00                  | 54.81               | 0.50              | 358    | 7.50   | 0.71076                  | 50         | 30.0       | n/a           |
| Phi   | 50.706 | 17.64                   | 17.21                 | 0.00                   | 54.81               | 0.50              | 720    | 7.50   | 0.71076                  | 50         | 30.0       | n/a           |

A colorless column-like specimen of  $\text{C}_{19}\text{H}_{31}\text{ClHgO}_2\text{Si}$ , approximate dimensions 0.032 mm x 0.079 mm x 0.268 mm, was used for the X-ray crystallographic analysis. The X-ray intensity data were measured on a Bruker D8 QUEST PHOTON 3 diffractometer system equipped with a fine-focus sealed tube ( $\text{MoK}\alpha$ ,  $\lambda = 0.71073 \text{ \AA}$ ) and a graphite monochromator.

A total of 2868 frames were collected. The total exposure time was 5.97 hours. The frames were integrated with the Bruker SAINT software package using a Bruker *SAINT* (Bruker, 2020) algorithm. The integration of the data using a monoclinic unit cell yielded a total of 75730 reflections to a maximum  $\theta$  angle of  $30.54^\circ$  (0.70 Å resolution), of which 6529 were independent (average redundancy 11.599, completeness = 99.8%,  $R_{\text{int}} = 3.30\%$ ,  $R_{\text{sig}} = 1.78\%$ ) and 5798 (88.80%) were greater than  $2\sigma(F^2)$ . The final cell constants of  $a = 6.2377(4)$  Å,  $b = 21.9140(12)$  Å,  $c = 15.9493(9)$  Å,  $\beta = 101.061(2)^\circ$ , volume =  $2139.7(2)$  Å<sup>3</sup>, are based upon the refinement of the XYZ-centroids of 9591 reflections above  $20\sigma(I)$  with  $5.205^\circ < 2\theta < 61.02^\circ$ . Data were corrected for absorption effects using the Numerical mu Calculated method (SADABS). The ratio of minimum to maximum apparent transmission was 0.404. The calculated minimum and maximum transmission coefficients (based on crystal size) are 0.2420 and 0.7980.

The structure was solved and refined using the Bruker SHELXTL Software Package, using the space group P 1 21/n 1, with  $Z = 4$  for the formula unit, C<sub>19</sub>H<sub>31</sub>ClHgO<sub>2</sub>Si. The final anisotropic full-matrix least-squares refinement on  $F^2$  with 224 variables converged at  $R1 = 2.03\%$ , for the observed data and  $wR2 = 4.24\%$  for all data. The goodness-of-fit was 1.137. The largest peak in the final difference electron density synthesis was  $0.598 \text{ e}^-/\text{Å}^3$  and the largest hole was  $-0.567 \text{ e}^-/\text{Å}^3$  with an RMS deviation of  $0.096 \text{ e}^-/\text{Å}^3$ . On the basis of the final model, the calculated density was  $1.725 \text{ g/cm}^3$  and  $F(000)$ , 1088 e<sup>-</sup>.

**Table 2. Sample and crystal data for JTM1445.**

|                               |                                                       |                            |
|-------------------------------|-------------------------------------------------------|----------------------------|
| <b>Identification code</b>    | JTM1445                                               |                            |
| <b>Chemical formula</b>       | C <sub>19</sub> H <sub>31</sub> ClHgO <sub>2</sub> Si |                            |
| <b>Formula weight</b>         | 555.57 g/mol                                          |                            |
| <b>Temperature</b>            | 150(2) K                                              |                            |
| <b>Wavelength</b>             | 0.71073 Å                                             |                            |
| <b>Crystal size</b>           | 0.032 x 0.079 x 0.268 mm                              |                            |
| <b>Crystal habit</b>          | colorless column                                      |                            |
| <b>Crystal system</b>         | monoclinic                                            |                            |
| <b>Space group</b>            | P 1 21/n 1                                            |                            |
| <b>Unit cell dimensions</b>   | $a = 6.2377(4)$ Å                                     | $\alpha = 90^\circ$        |
|                               | $b = 21.9140(12)$ Å                                   | $\beta = 101.061(2)^\circ$ |
|                               | $c = 15.9493(9)$ Å                                    | $\gamma = 90^\circ$        |
| <b>Volume</b>                 | $2139.7(2)$ Å <sup>3</sup>                            |                            |
| <b>Z</b>                      | 4                                                     |                            |
| <b>Density (calculated)</b>   | $1.725 \text{ g/cm}^3$                                |                            |
| <b>Absorption coefficient</b> | $7.383 \text{ mm}^{-1}$                               |                            |
| <b>F(000)</b>                 | 1088                                                  |                            |

**Table 3. Data collection and structure refinement for JTM1445.**

|                                            |                                                                           |              |       |
|--------------------------------------------|---------------------------------------------------------------------------|--------------|-------|
| <b>Diffractometer</b>                      | Bruker D8 QUEST PHOTON 3 diffractometer                                   |              |       |
| <b>Radiation source</b>                    | fine-focus sealed tube (MoK $\alpha$ , $\lambda = 0.71073$ Å)             |              |       |
| <b>Theta range for data collection</b>     | 2.60 to 30.54°                                                            |              |       |
| <b>Index ranges</b>                        | -8 $\leq h \leq$ 8, -31 $\leq k \leq$ 31, -22 $\leq l \leq$ 22            |              |       |
| <b>Reflections collected</b>               | 75730                                                                     |              |       |
| <b>Independent reflections</b>             | 6529 [R(int) = 0.0330]                                                    |              |       |
| <b>Coverage of independent reflections</b> | 99.8%                                                                     |              |       |
| <b>Absorption correction</b>               | Numerical mu Calculated                                                   |              |       |
| <b>Max. and min. transmission</b>          | 0.7980 and 0.2420                                                         |              |       |
| <b>Structure solution technique</b>        | direct methods                                                            |              |       |
| <b>Structure solution program</b>          | SHELXT/5 (Sheldrick, 2015a)                                               |              |       |
| <b>Refinement method</b>                   | Full-matrix least-squares on F <sup>2</sup>                               |              |       |
| <b>Refinement program</b>                  | SHELXL 2018/3 (Sheldrick, 2015b)                                          |              |       |
| <b>Function minimized</b>                  | $\Sigma w(F_o^2 - F_c^2)^2$                                               |              |       |
| <b>Data / restraints / parameters</b>      | 6529 / 0 / 224                                                            |              |       |
| <b>Goodness-of-fit on F<sup>2</sup></b>    | 1.137                                                                     |              |       |
| <b><math>\Delta/\sigma_{\max}</math></b>   | 0.003                                                                     |              |       |
| <b>Final R indices</b>                     | 5798 data;                                                                | R1 = 0.0203, | wR2 = |
|                                            | $>2\sigma(I)$                                                             | 0.0407       |       |
| <b>Weighting scheme</b>                    | all data                                                                  | R1 = 0.0255, | wR2 = |
|                                            |                                                                           | 0.0424       |       |
| <b>Weighting scheme</b>                    | $w=1/[\sigma^2(F_o^2)+(0.0139P)^2+1.9168P]$<br>where $P=(F_o^2+2F_c^2)/3$ |              |       |
| <b>Largest diff. peak and hole</b>         | 0.598 and -0.567 eÅ <sup>-3</sup>                                         |              |       |
| <b>R.M.S. deviation from mean</b>          | 0.096 eÅ <sup>-3</sup>                                                    |              |       |

**Table 4. Atomic coordinates and equivalent isotropic atomic displacement parameters (Å<sup>2</sup>) for JTM1445.**

U(eq) is defined as one third of the trace of the orthogonalized U<sub>ij</sub> tensor.

|     | <b>x/a</b>  | <b>y/b</b> | <b>z/c</b>  | <b>U(eq)</b> |
|-----|-------------|------------|-------------|--------------|
| Hg1 | 0.73538(2)  | 0.45938(2) | 0.93348(2)  | 0.02121(3)   |
| Cl1 | 0.70171(10) | 0.56102(3) | 0.97257(4)  | 0.02775(12)  |
| Si1 | 0.33919(9)  | 0.40382(3) | 0.69733(4)  | 0.01713(11)  |
| O1  | 0.5913(2)   | 0.40670(7) | 0.75580(10) | 0.0192(3)    |
| O2  | 0.2430(2)   | 0.34992(7) | 0.75389(9)  | 0.0184(3)    |



|     | <b>x/a</b> | <b>y/b</b>  | <b>z/c</b>  | <b>U(eq)</b> |
|-----|------------|-------------|-------------|--------------|
| C1  | 0.3999(4)  | 0.22468(10) | 0.78045(14) | 0.0208(4)    |
| C2  | 0.2163(4)  | 0.21370(11) | 0.71691(17) | 0.0280(5)    |
| C3  | 0.2277(5)  | 0.17563(12) | 0.64840(17) | 0.0355(6)    |
| C4  | 0.4239(5)  | 0.14788(12) | 0.64236(18) | 0.0372(6)    |
| C5  | 0.6062(5)  | 0.15729(11) | 0.70493(18) | 0.0335(6)    |
| C6  | 0.5937(4)  | 0.19509(10) | 0.77355(16) | 0.0261(5)    |
| C7  | 0.3911(4)  | 0.26781(10) | 0.85419(14) | 0.0203(4)    |
| C8  | 0.1951(4)  | 0.25510(11) | 0.89629(17) | 0.0300(5)    |
| C9  | 0.4013(3)  | 0.33545(9)  | 0.82957(13) | 0.0176(4)    |
| C10 | 0.6262(3)  | 0.35493(10) | 0.81273(14) | 0.0187(4)    |
| C11 | 0.7880(4)  | 0.37139(10) | 0.89358(15) | 0.0238(4)    |
| C12 | 0.3377(4)  | 0.37350(11) | 0.58628(14) | 0.0238(4)    |
| C13 | 0.4030(4)  | 0.42253(13) | 0.52664(16) | 0.0322(6)    |
| C14 | 0.1106(4)  | 0.34790(13) | 0.54703(17) | 0.0352(6)    |
| C15 | 0.5048(5)  | 0.32111(12) | 0.59408(17) | 0.0324(6)    |
| C16 | 0.2082(4)  | 0.48073(10) | 0.70635(15) | 0.0227(4)    |
| C17 | 0.9880(5)  | 0.48736(14) | 0.64503(19) | 0.0388(6)    |
| C18 | 0.3635(5)  | 0.53257(11) | 0.6909(2)   | 0.0392(7)    |
| C19 | 0.1667(4)  | 0.48651(12) | 0.79768(16) | 0.0307(5)    |

**Table 5. Bond lengths (Å) for JTM1445.**

|          |            |          |            |
|----------|------------|----------|------------|
| Hg1-C11  | 2.076(2)   | Hg1-Cl1  | 2.3333(6)  |
| Si1-O2   | 1.6663(16) | Si1-O1   | 1.6684(16) |
| Si1-C12  | 1.890(2)   | Si1-C16  | 1.891(2)   |
| O1-C10   | 1.443(2)   | O2-C9    | 1.440(2)   |
| C1-C6    | 1.395(3)   | C1-C2    | 1.397(3)   |
| C1-C7    | 1.518(3)   | C2-C3    | 1.387(4)   |
| C2-H2    | 0.95       | C3-C4    | 1.386(4)   |
| C3-H3    | 0.95       | C4-C5    | 1.377(4)   |
| C4-H4    | 0.95       | C5-C6    | 1.387(3)   |
| C5-H5    | 0.95       | C6-H6    | 0.95       |
| C7-C8    | 1.529(3)   | C7-C9    | 1.538(3)   |
| C7-H7    | 1.0        | C8-H8A   | 0.98       |
| C8-H8B   | 0.98       | C8-H8C   | 0.98       |
| C9-C10   | 1.539(3)   | C9-H9    | 1.0        |
| C10-C11  | 1.521(3)   | C10-H10  | 1.0        |
| C11-H11A | 0.99       | C11-H11B | 0.99       |

|          |          |          |          |
|----------|----------|----------|----------|
| C12-C15  | 1.540(4) | C12-C13  | 1.540(3) |
| C12-C14  | 1.541(3) | C13-H13A | 0.98     |
| C13-H13B | 0.98     | C13-H13C | 0.98     |
| C14-H14A | 0.98     | C14-H14B | 0.98     |
| C14-H14C | 0.98     | C15-H15A | 0.98     |
| C15-H15B | 0.98     | C15-H15C | 0.98     |
| C16-C17  | 1.532(3) | C16-C19  | 1.533(3) |
| C16-C18  | 1.543(3) | C17-H17A | 0.98     |
| C17-H17B | 0.98     | C17-H17C | 0.98     |
| C18-H18A | 0.98     | C18-H18B | 0.98     |
| C18-H18C | 0.98     | C19-H19A | 0.98     |
| C19-H19B | 0.98     | C19-H19C | 0.98     |

**Table 6. Bond angles (°) for JTM1445.**

|             |            |            |            |
|-------------|------------|------------|------------|
| C11-Hg1-Cl1 | 174.92(7)  | O2-Si1-O1  | 97.05(8)   |
| O2-Si1-C12  | 108.71(9)  | O1-Si1-C12 | 111.82(10) |
| O2-Si1-C16  | 112.64(9)  | O1-Si1-C16 | 107.36(9)  |
| C12-Si1-C16 | 117.40(11) | C10-O1-Si1 | 109.53(12) |
| C9-O2-Si1   | 110.47(12) | C6-C1-C2   | 117.7(2)   |
| C6-C1-C7    | 120.7(2)   | C2-C1-C7   | 121.5(2)   |
| C3-C2-C1    | 121.1(2)   | C3-C2-H2   | 119.5      |
| C1-C2-H2    | 119.5      | C4-C3-C2   | 119.9(3)   |
| C4-C3-H3    | 120.1      | C2-C3-H3   | 120.1      |
| C5-C4-C3    | 120.1(2)   | C5-C4-H4   | 120.0      |
| C3-C4-H4    | 120.0      | C4-C5-C6   | 119.9(2)   |
| C4-C5-H5    | 120.1      | C6-C5-H5   | 120.1      |
| C5-C6-C1    | 121.4(2)   | C5-C6-H6   | 119.3      |
| C1-C6-H6    | 119.3      | C1-C7-C8   | 112.18(19) |
| C1-C7-C9    | 113.14(17) | C8-C7-C9   | 111.29(18) |
| C1-C7-H7    | 106.6      | C8-C7-H7   | 106.6      |
| C9-C7-H7    | 106.6      | C7-C8-H8A  | 109.5      |
| C7-C8-H8B   | 109.5      | H8A-C8-H8B | 109.5      |
| C7-C8-H8C   | 109.5      | H8A-C8-H8C | 109.5      |
| H8B-C8-H8C  | 109.5      | O2-C9-C7   | 111.77(17) |
| O2-C9-C10   | 107.10(16) | C7-C9-C10  | 113.30(17) |
| O2-C9-H9    | 108.2      | C7-C9-H9   | 108.2      |
| C10-C9-H9   | 108.2      | O1-C10-C11 | 110.03(17) |
| O1-C10-C9   | 107.17(16) | C11-C10-C9 | 113.37(18) |

|               |            |               |            |
|---------------|------------|---------------|------------|
| O1-C10-H10    | 108.7      | C11-C10-H10   | 108.7      |
| C9-C10-H10    | 108.7      | C10-C11-Hg1   | 111.23(14) |
| C10-C11-H11A  | 109.4      | Hg1-C11-H11A  | 109.4      |
| C10-C11-H11B  | 109.4      | Hg1-C11-H11B  | 109.4      |
| H11A-C11-H11B | 108.0      | C15-C12-C13   | 108.4(2)   |
| C15-C12-C14   | 108.5(2)   | C13-C12-C14   | 109.5(2)   |
| C15-C12-Si1   | 107.75(16) | C13-C12-Si1   | 112.28(17) |
| C14-C12-Si1   | 110.34(16) | C12-C13-H13A  | 109.5      |
| C12-C13-H13B  | 109.5      | H13A-C13-H13B | 109.5      |
| C12-C13-H13C  | 109.5      | H13A-C13-H13C | 109.5      |
| H13B-C13-H13C | 109.5      | C12-C14-H14A  | 109.5      |
| C12-C14-H14B  | 109.5      | H14A-C14-H14B | 109.5      |
| C12-C14-H14C  | 109.5      | H14A-C14-H14C | 109.5      |
| H14B-C14-H14C | 109.5      | C12-C15-H15A  | 109.5      |
| C12-C15-H15B  | 109.5      | H15A-C15-H15B | 109.5      |
| C12-C15-H15C  | 109.5      | H15A-C15-H15C | 109.5      |
| H15B-C15-H15C | 109.5      | C17-C16-C19   | 107.7(2)   |
| C17-C16-C18   | 110.0(2)   | C19-C16-C18   | 108.5(2)   |
| C17-C16-Si1   | 112.54(18) | C19-C16-Si1   | 107.47(15) |
| C18-C16-Si1   | 110.51(17) | C16-C17-H17A  | 109.5      |
| C16-C17-H17B  | 109.5      | H17A-C17-H17B | 109.5      |
| C16-C17-H17C  | 109.5      | H17A-C17-H17C | 109.5      |
| H17B-C17-H17C | 109.5      | C16-C18-H18A  | 109.5      |
| C16-C18-H18B  | 109.5      | H18A-C18-H18B | 109.5      |
| C16-C18-H18C  | 109.5      | H18A-C18-H18C | 109.5      |
| H18B-C18-H18C | 109.5      | C16-C19-H19A  | 109.5      |
| C16-C19-H19B  | 109.5      | H19A-C19-H19B | 109.5      |
| C16-C19-H19C  | 109.5      | H19A-C19-H19C | 109.5      |
| H19B-C19-H19C | 109.5      |               |            |

**Table 7. Torsion angles (°) for JTM1445.**

|                |            |                |             |
|----------------|------------|----------------|-------------|
| O2-Si1-O1-C10  | 12.76(14)  | C12-Si1-O1-C10 | -100.67(15) |
| C16-Si1-O1-C10 | 129.19(14) | O1-Si1-O2-C9   | 6.43(14)    |
| C12-Si1-O2-C9  | 122.37(14) | C16-Si1-O2-C9  | -105.74(14) |
| C6-C1-C2-C3    | -1.3(3)    | C7-C1-C2-C3    | 178.0(2)    |
| C1-C2-C3-C4    | -0.1(4)    | C2-C3-C4-C5    | 1.1(4)      |
| C3-C4-C5-C6    | -0.7(4)    | C4-C5-C6-C1    | -0.7(4)     |
| C2-C1-C6-C5    | 1.7(3)     | C7-C1-C6-C5    | -177.6(2)   |

|                 |             |                 |            |
|-----------------|-------------|-----------------|------------|
| C6-C1-C7-C8     | -132.3(2)   | C2-C1-C7-C8     | 48.4(3)    |
| C6-C1-C7-C9     | 100.8(2)    | C2-C1-C7-C9     | -78.5(3)   |
| Si1-O2-C9-C7    | -146.86(14) | Si1-O2-C9-C10   | -22.21(19) |
| C1-C7-C9-O2     | 51.0(2)     | C8-C7-C9-O2     | -76.4(2)   |
| C1-C7-C9-C10    | -70.1(2)    | C8-C7-C9-C10    | 162.52(19) |
| Si1-O1-C10-C11  | -150.35(15) | Si1-O1-C10-C9   | -26.66(19) |
| O2-C9-C10-O1    | 30.9(2)     | C7-C9-C10-O1    | 154.62(17) |
| O2-C9-C10-C11   | 152.53(17)  | C7-C9-C10-C11   | -83.8(2)   |
| O1-C10-C11-Hg1  | 39.6(2)     | C9-C10-C11-Hg1  | -80.41(19) |
| O2-Si1-C12-C15  | -66.35(17)  | O1-Si1-C12-C15  | 39.62(18)  |
| C16-Si1-C12-C15 | 164.35(16)  | O2-Si1-C12-C13  | 174.39(16) |
| O1-Si1-C12-C13  | -79.64(19)  | C16-Si1-C12-C13 | 45.1(2)    |
| O2-Si1-C12-C14  | 51.9(2)     | O1-Si1-C12-C14  | 157.86(17) |
| C16-Si1-C12-C14 | -77.4(2)    | O2-Si1-C16-C17  | -82.83(19) |
| O1-Si1-C16-C17  | 171.53(17)  | C12-Si1-C16-C17 | 44.6(2)    |
| O2-Si1-C16-C19  | 35.64(19)   | O1-Si1-C16-C19  | -70.01(18) |
| C12-Si1-C16-C19 | 163.06(16)  | O2-Si1-C16-C18  | 153.80(17) |
| O1-Si1-C16-C18  | 48.2(2)     | C12-Si1-C16-C18 | -78.8(2)   |

**Table 8. Anisotropic atomic displacement parameters ( $\text{\AA}^2$ ) for JTM1445.**

The anisotropic atomic displacement factor exponent takes the form: -  
 $2\pi^2 [ h^2 a^{*2} U_{11} + \dots + 2 h k a^* b^* U_{12} ]$

|     | $U_{11}$   | $U_{22}$   | $U_{33}$   | $U_{23}$    | $U_{13}$   | $U_{12}$    |
|-----|------------|------------|------------|-------------|------------|-------------|
| Hg1 | 0.02149(4) | 0.02099(4) | 0.01980(4) | -0.00195(3) | 0.00054(3) | -0.00205(3) |
| Cl1 | 0.0330(3)  | 0.0219(3)  | 0.0286(3)  | -0.0041(2)  | 0.0066(2)  | -0.0038(2)  |
| Si1 | 0.0179(3)  | 0.0165(3)  | 0.0168(3)  | 0.0014(2)   | 0.0026(2)  | -0.0014(2)  |
| O1  | 0.0184(7)  | 0.0172(7)  | 0.0213(7)  | 0.0033(6)   | 0.0023(6)  | -0.0030(6)  |
| O2  | 0.0167(7)  | 0.0181(7)  | 0.0197(7)  | 0.0028(6)   | 0.0017(6)  | -0.0011(6)  |
| C1  | 0.0245(11) | 0.0151(10) | 0.0242(11) | 0.0023(8)   | 0.0080(9)  | -0.0005(8)  |
| C2  | 0.0275(12) | 0.0209(11) | 0.0350(13) | 0.0002(9)   | 0.0044(10) | -0.0047(9)  |
| C3  | 0.0455(16) | 0.0252(12) | 0.0328(14) | -0.0042(10) | 0.0000(12) | -0.0096(11) |
| C4  | 0.0607(19) | 0.0200(12) | 0.0329(14) | -0.0039(10) | 0.0141(13) | -0.0033(12) |
| C5  | 0.0425(15) | 0.0207(11) | 0.0408(15) | -0.0017(10) | 0.0165(12) | 0.0051(10)  |
| C6  | 0.0259(12) | 0.0185(11) | 0.0344(13) | -0.0001(9)  | 0.0069(10) | 0.0009(9)   |
| C7  | 0.0216(10) | 0.0184(10) | 0.0214(10) | 0.0025(8)   | 0.0052(8)  | 0.0011(8)   |
| C8  | 0.0366(14) | 0.0245(12) | 0.0336(13) | 0.0062(10)  | 0.0184(11) | 0.0017(10)  |
| C9  | 0.0190(10) | 0.0165(9)  | 0.0176(9)  | 0.0002(7)   | 0.0039(8)  | 0.0016(8)   |

|     | $U_{11}$   | $U_{22}$   | $U_{33}$   | $U_{23}$    | $U_{13}$    | $U_{12}$    |
|-----|------------|------------|------------|-------------|-------------|-------------|
| C10 | 0.0178(10) | 0.0168(9)  | 0.0213(10) | 0.0016(8)   | 0.0032(8)   | 0.0018(8)   |
| C11 | 0.0215(11) | 0.0216(11) | 0.0262(11) | -0.0003(9)  | -0.0008(9)  | 0.0019(9)   |
| C12 | 0.0271(11) | 0.0267(11) | 0.0182(10) | -0.0014(9)  | 0.0059(8)   | -0.0060(9)  |
| C13 | 0.0363(14) | 0.0396(14) | 0.0210(12) | 0.0069(10)  | 0.0066(10)  | -0.0062(11) |
| C14 | 0.0357(14) | 0.0413(15) | 0.0278(13) | -0.0099(11) | 0.0042(11)  | -0.0130(12) |
| C15 | 0.0418(15) | 0.0311(13) | 0.0285(13) | -0.0028(10) | 0.0174(11)  | 0.0022(11)  |
| C16 | 0.0247(11) | 0.0182(10) | 0.0249(11) | 0.0042(8)   | 0.0043(9)   | 0.0014(9)   |
| C17 | 0.0325(14) | 0.0427(16) | 0.0371(15) | 0.0014(12)  | -0.0032(12) | 0.0141(12)  |
| C18 | 0.0486(17) | 0.0171(12) | 0.0552(18) | 0.0048(11)  | 0.0183(14)  | -0.0049(11) |
| C19 | 0.0373(14) | 0.0253(12) | 0.0306(13) | -0.0012(10) | 0.0091(11)  | 0.0088(10)  |

**Table 9. Hydrogen atomic coordinates and isotropic atomic displacement parameters ( $\text{\AA}^2$ ) for JTM1445.**

|      | $x/a$  | $y/b$  | $z/c$  | $U(\text{eq})$ |
|------|--------|--------|--------|----------------|
| H2   | 0.0814 | 0.2326 | 0.7207 | 0.034          |
| H3   | 0.1014 | 0.1686 | 0.6057 | 0.043          |
| H4   | 0.4326 | 0.1223 | 0.5950 | 0.045          |
| H5   | 0.7402 | 0.1379 | 0.7011 | 0.04           |
| H6   | 0.7198 | 0.2010 | 0.8168 | 0.031          |
| H7   | 0.5247 | 0.2595 | 0.8985 | 0.024          |
| H8A  | 0.2062 | 0.2801 | 0.9479 | 0.045          |
| H8B  | 0.1935 | 0.2118 | 0.9117 | 0.045          |
| H8C  | 0.0600 | 0.2652 | 0.8563 | 0.045          |
| H9   | 0.3679 | 0.3607 | 0.8777 | 0.021          |
| H10  | 0.6882 | 0.3207 | 0.7834 | 0.022          |
| H11A | 0.9386 | 0.3681 | 0.8827 | 0.029          |
| H11B | 0.7731 | 0.3422 | 0.9394 | 0.029          |
| H13A | 0.5465 | 0.4392 | 0.5521 | 0.048          |
| H13B | 0.2943 | 0.4554 | 0.5187 | 0.048          |
| H13C | 0.4096 | 0.4042 | 0.4712 | 0.048          |
| H14A | 0.0027 | 0.3809 | 0.5405 | 0.053          |
| H14B | 0.0701 | 0.3163 | 0.5846 | 0.053          |
| H14C | 0.1145 | 0.3302 | 0.4909 | 0.053          |
| H15A | 0.4641 | 0.2891 | 0.6310 | 0.049          |
| H15B | 0.6504 | 0.3367 | 0.6189 | 0.049          |
| H15C | 0.5063 | 0.3042 | 0.5373 | 0.049          |

|      | x/a     | y/b    | z/c    | U(eq) |
|------|---------|--------|--------|-------|
| H17A | -0.0752 | 0.5273 | 0.6533 | 0.058 |
| H17B | -0.1113 | 0.4551 | 0.6566 | 0.058 |
| H17C | 0.0098  | 0.4839 | 0.5860 | 0.058 |
| H18A | 0.5017  | 0.5290 | 0.7319 | 0.059 |
| H18B | 0.2960  | 0.5721 | 0.6984 | 0.059 |
| H18C | 0.3915  | 0.5296 | 0.6326 | 0.059 |
| H19A | 0.3052  | 0.4823 | 0.8384 | 0.046 |
| H19B | 0.0658  | 0.4544 | 0.8081 | 0.046 |
| H19C | 0.1027  | 0.5265 | 0.8050 | 0.046 |

### X. Mechanistic Experiments

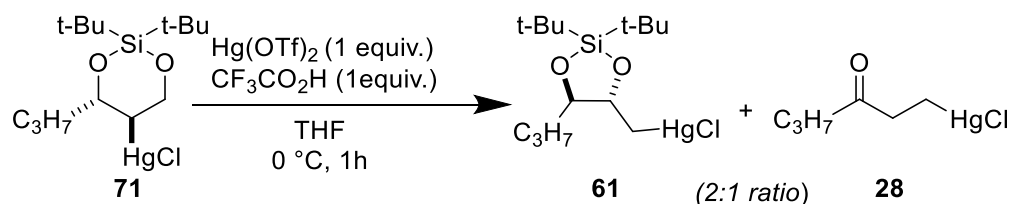

A 10 mL recovery flask with stir bar was charged with **71** (0.1 mmol, 49 mg, 1 equiv.),  $\text{Hg(OTf)}_2$  (0.1 mmol, 49 mg, 1 equiv.), and 1 mL of THF. The flask was cooled to 0 °C using an ice-water bath. Subsequently,  $\text{CF}_3\text{CO}_2\text{H}$  (0.1 mmol, 12 mg, 1 equiv.) was added, and the reaction was allowed to stir for 1h. Following this time, 1 mL of brine solution was added, and the contents of the reaction flask were transferred to a separatory funnel. An additional 10 mL of brine were added followed by 10 mL of  $\text{CH}_2\text{Cl}_2$ . The organic portion was collected, and the aqueous layer was extracted with two additional portions of  $\text{CH}_2\text{Cl}_2$ . The organic fractions were pooled, dried with  $\text{MgSO}_4$ , and concentrated under reduced pressure.  $^1\text{H}$  NMR (400 MHz,  $\text{CDCl}_3$ ) analysis of the crude residue revealed:

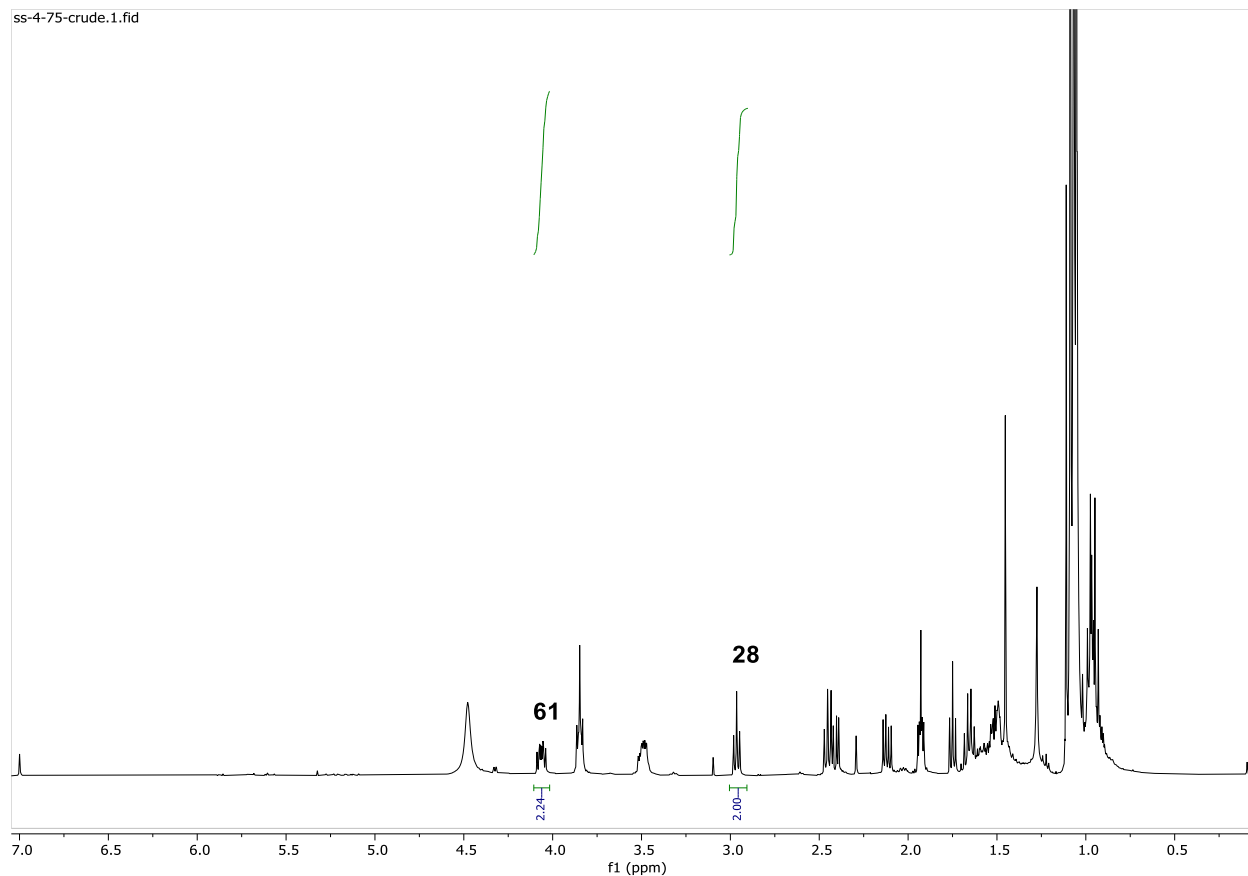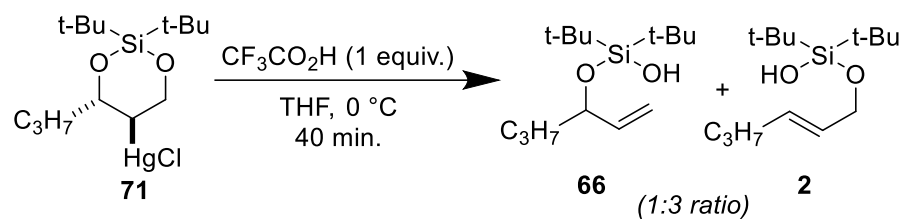

A 10 mL recovery flask with stir bar was charged with **71** (0.1 mmol, 49 mg, 1 equiv.) and 1 mL of THF. The flask was cooled to 0 °C using an ice-water bath. Subsequently, CF<sub>3</sub>CO<sub>2</sub>H (0.1 mmol, 12 mg, 1 equiv.) was added, and the reaction was allowed to stir for 1h. Following this time, 1 mL of brine solution was added, and the contents of the reaction flask were transferred to a separatory funnel. An additional 10 mL of brine were added followed by 10 mL of CH<sub>2</sub>Cl<sub>2</sub>. The organic portion was collected, and the aqueous layer was extracted with two additional portions of CH<sub>2</sub>Cl<sub>2</sub>. The organic fractions were pooled, dried with MgSO<sub>4</sub>, and concentrated under reduced pressure. <sup>1</sup>H NMR (400 MHz, CDCl<sub>3</sub>) analysis of the crude residue revealed:

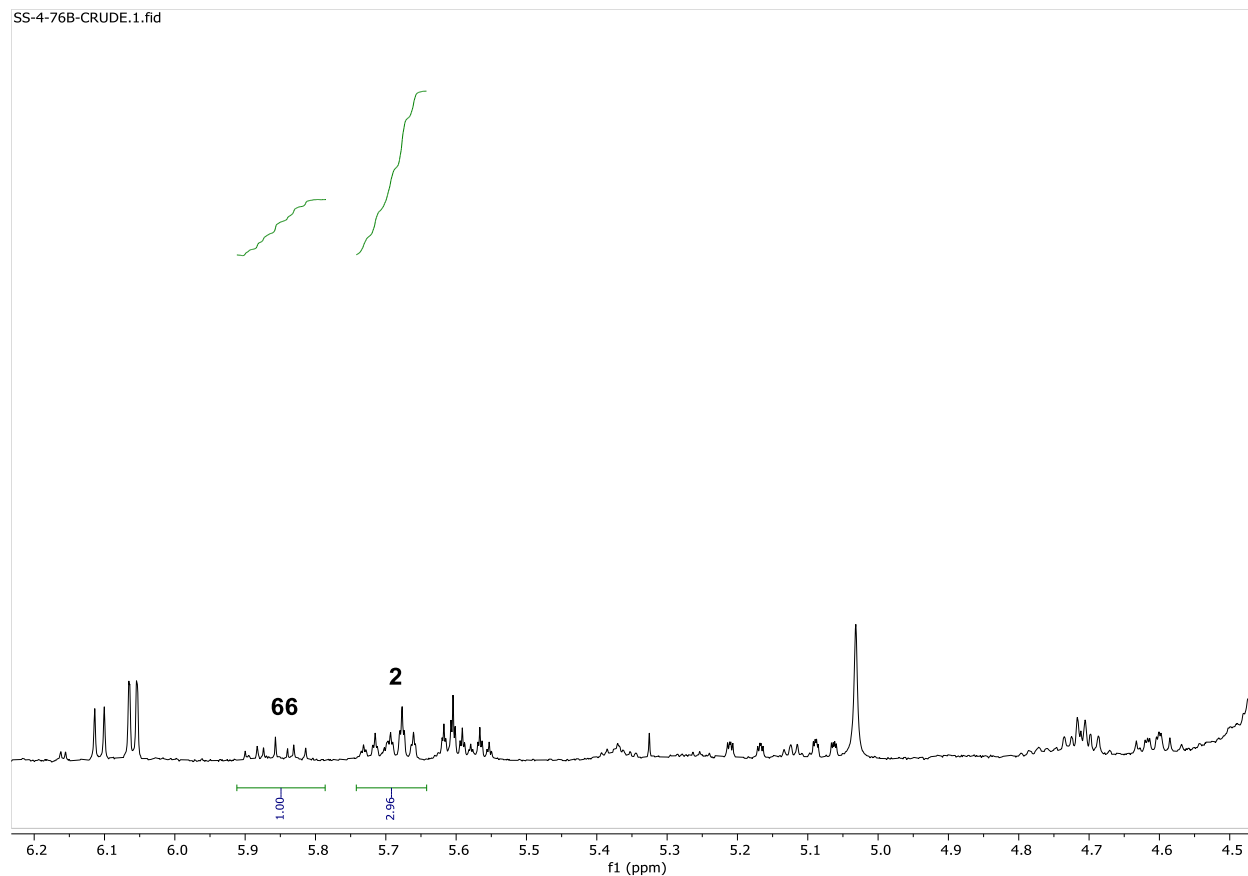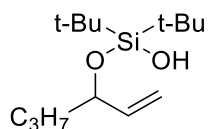di-*tert*-butyl(hex-1-en-3-yloxy)silanol

**Compound 61:**  $^1\text{H}$  NMR (400 MHz,  $\text{CDCl}_3$ )  $\delta$  5.86 (ddd,  $J = 17.2, 10.3, 6.8$  Hz, 1H), 5.19 (ddd,  $J = 17.3, 1.9, 1.2$  Hz, 1H), 5.08 (ddd,  $J = 10.4, 1.9, 1.0$  Hz, 1H), 4.41 (dtd,  $J = 6.7, 5.6, 1.1$  Hz, 1H), 1.60 (dddd,  $J = 13.0, 8.6, 7.5, 5.6$  Hz, 1H), 1.55 – 1.45 (m, 1H), 1.43 – 1.32 (m, 2H), 1.06 (s, 9H), 1.02 (s, 9H), 0.94 (t,  $J = 7.3$  Hz, 3H).  $^{13}\text{C}$  NMR (101 MHz,  $\text{CDCl}_3$ )  $\delta$  142.0, 113.9, 74.3, 40.4, 27.5, 27.4, 20.5, 20.3, 18.1, 14.1. IR 3503, 2932, 1471, 1071  $\text{cm}^{-1}$ ; HRMS calculated for  $\text{C}_{14}\text{H}_{31}\text{O}_2\text{Si}^+$  259.2093 Found 259.2079 ( $\text{MH}^+$ ).

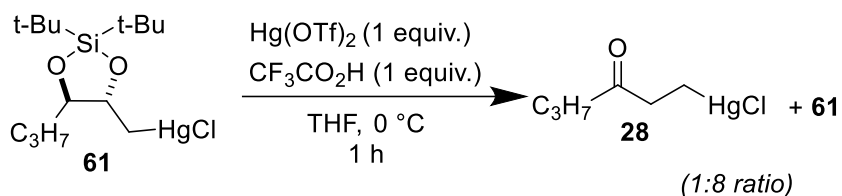

A 10 mL recovery flask with stir bar was charged with **A** (0.05 mmol, 22 mg, 1 equiv.),  $\text{Hg}(\text{OTf})_2$  (0.05 mmol, 22 mg, 1 equiv.), and 1 mL of THF. The flask was cooled to 0 °C using an ice-water bath. Subsequently,  $\text{CF}_3\text{CO}_2\text{H}$  (0.05 mmol, 5 mg, 1 equiv.) was added, and the reaction was allowed to stir for 1h. Following



this time, 1 mL of brine solution was added, and the contents of the reaction flask were transferred to a separatory funnel. An additional 10 mL of brine were added followed by 10 mL of CH<sub>2</sub>Cl<sub>2</sub>. The organic portion was collected, and the aqueous layer was extracted with two additional portions of CH<sub>2</sub>Cl<sub>2</sub>. The organic fractions were pooled, dried with MgSO<sub>4</sub>, and concentrated under reduced pressure. <sup>1</sup>H NMR (400 MHz, CDCl<sub>3</sub>) analysis of the crude residue revealed:

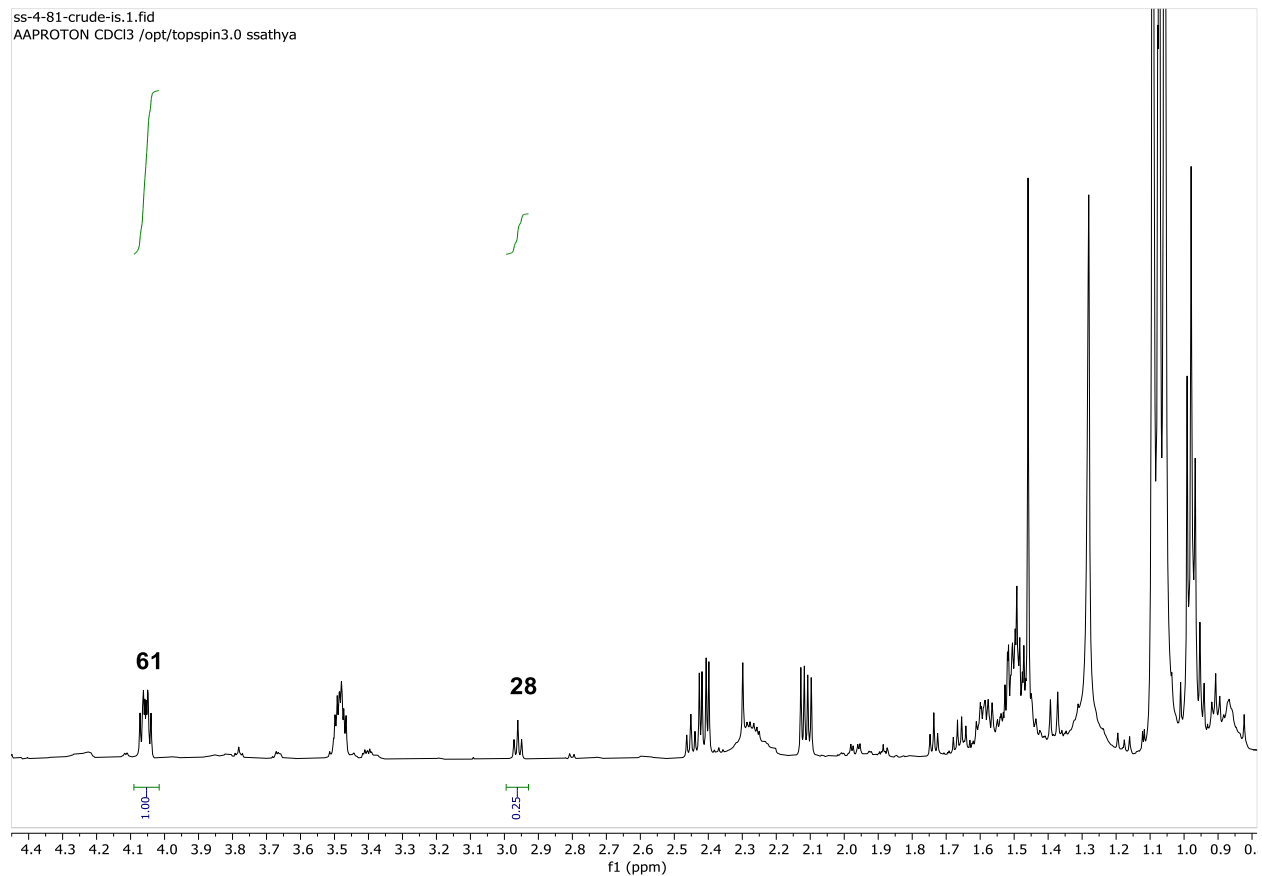

## XI. Computational Procedures and Results

Calculations were performed at home on a desktop gaming PC running Windows 10 with an Intel® Core™ i7-8700K CPU @ 3.70 GHz (6 CPUs) and 16 GB of RAM. The ORCA DFT package<sup>1,2</sup> was used for all DFT calculations. Calculation inputs were prepared using Avogadro<sup>3</sup>, and when multiple conformers were possible, a systematic rotor search was performed to identify the lowest energy conformer as a starting point. DFT outputs were analyzed and visualized using Chemcraft<sup>4</sup>. DFT calculations were performed using the B3LYP<sup>5,6</sup> functional with the RIJCOSX approximation and D3BJ<sup>7,8</sup> dispersion correction using the def2-TZVP<sup>9</sup> basis set and def2/J<sup>10</sup> auxiliary basis set for RIJCOSX. For calculations involving mercury, the DEF2-ECP was automatically applied by ORCA, replacing 60 core electrons.<sup>11</sup> The SMD solvation module<sup>12</sup> was used to model implicit THF solvation. The larger solvent accessible surface (SAS) was used instead of the default smaller solvent excluded surface (SES) on account of geometry convergence issues with the latter.

### Example ORCA Input card for a groundstate opt-freq job:

```
! RKS RIJCOSX B3LYP D3BJ def2-TZVP def2/J           #Level of theory
! Grid5 FinalGrid6 GridX7 tightSCF slowconv         #Tight grids lead to best results
! OPT FREQ
! pal6                                               #6 CPUs used on local machine
%maxcore 2048                                       #2GB RAM allocated per CPU
! CPCM(THF)                                         #Implicit water solvation
%cpcm
smd true SMDsolvent "THF"
surfacetypе gepol_sas                               #Solvent accessible surface (SAS) used
end

* xyz 0 1
#Atomic coordinates go here
*
```

---

<sup>1</sup> Neese, F. The ORCA program system. Wiley Interdiscip. Rev.: Comput. Mol. Sci. **2012**, 2, 73–78.

<sup>2</sup> Neese, F. Software update: the ORCA program system, version 4.0. Wiley Interdiscip. Rev.: Comput. Mol. Sci. **2017**, 8, e1327.

<sup>3</sup> Hanwell, M. D.; Curtis, D. E.; Lonie, D. C.; Vandermeersch, T.; Zurek, E.; Hutchinson, G. R. Avogadro: an advanced semantic chemical editor, visualization, and analysis platform. *Journal of Cheminformatics* **2012**, 4:17.

<sup>4</sup> <https://www.chemcraftprog.com>

<sup>5</sup> Becke, A. D. A new mixing of Hartree–Fock and local density-functional theories. *J. Chem. Phys.* **1993**, 98, 5648–5653.

<sup>6</sup> Lee, C.; Yang, W.; Parr, R. G. Development of the Colle-Salvetti correlation-energy formula into a functional of the electron density. *Phys. Rev. B* **1988**, 37, 785–789.

<sup>7</sup> Grimme, S.; Ehrlich, S.; Goerigk, L. Effect of the damping function in dispersion corrected density functional theory. *J. Comput. Chem.* **2011**, 32, 1456–1465.

<sup>8</sup> Grimme, S.; Antony, J.; Ehrlich, S.; Krieg, H. A consistent and accurate ab initio parametrization of density functional dispersion correction (DFT-D) for the 94 elements H–Pu. *J. Chem. Phys.* **2010**, 132, 154104.

<sup>9</sup> Weigend, F.; Ahlrichs, R. Balanced basis sets of split valence, triple zeta valence and quadruple zeta valence quality for H to Rn: Design and assessment of accuracy. *Phys. Chem. Chem. Phys.* **2005**, 7, 3297–3305.

<sup>10</sup> Weigend, F. Accurate Coulomb-fitting basis sets for H to Rn. *Phys. Chem. Chem. Phys.* **2006**, 8, 1057–1065.

<sup>11</sup> Andraw, D.; Haeussermann, U.; Dolg, M.; Stoll, H.; Preuss, H. Energy-adjusted *ab initio* pseudopotentials for the second and third row transition elements. *Theor. Chim. Acta*, **1990**, 77, 123–141.

<sup>12</sup> Marenich, A. V.; Cramer, C. J.; Truhlar, D. G. Universal Solvation Model Based on Solute Electron Density and on a Continuum Model of the Solvent Defined by the Bulk Dielectric Constant and Atomic Surface Tensions. *J. Phys. Chem. B*, **2009**, 113, 6378–6396.

### 5-exo cyclized mercuric chloride

Level of theory: B3LYP D3BJ RIJCOSX  
def2/TZVP SMD THF (SAS)

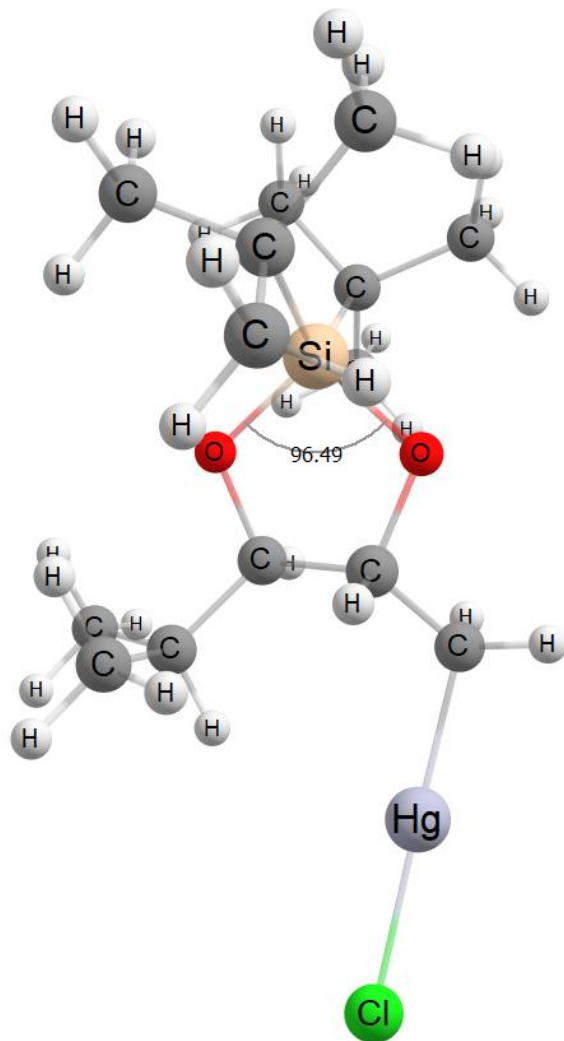

|   |          |          |          |
|---|----------|----------|----------|
| C | -1.64084 | -1.80330 | -0.25006 |
| C | -1.08211 | -3.14611 | 0.21516  |
| C | -3.09927 | -1.64142 | 0.17926  |
| H | 1.09743  | -1.52804 | -0.23599 |
| H | 1.92628  | 0.25379  | -1.78112 |
| H | 0.38393  | 1.10267  | -1.63431 |
| H | -1.62263 | -1.78621 | -1.34700 |
| H | -1.70328 | -3.96193 | -0.15908 |
| H | -0.06634 | -3.32556 | -0.14022 |
| H | -1.07646 | -3.20423 | 1.30393  |
| H | -3.51944 | -0.70089 | -0.18468 |
| H | -3.18118 | -1.64634 | 1.26711  |
| H | -3.71278 | -2.45483 | -0.21257 |
| H | -1.32330 | 0.30847  | -0.13958 |
| C | -0.79042 | 2.59639  | 1.70592  |
| C | 1.48931  | 2.84518  | 2.69411  |
| C | -0.43102 | 2.08191  | 4.12430  |
| C | 1.93771  | -2.13752 | 2.67967  |
| C | 0.45131  | -1.36160 | 4.53329  |
| C | 2.64232  | -0.21045 | 4.10337  |
| H | -0.37954 | 2.59262  | 0.69451  |
| H | -1.01334 | 3.63759  | 1.96226  |
| H | -1.73518 | 2.05007  | 1.69314  |
| H | -1.34258 | 1.48379  | 4.19626  |
| H | -0.70279 | 3.11709  | 4.35806  |
| H | 0.25383  | 1.74697  | 4.90470  |
| H | 1.97254  | 2.80303  | 1.71608  |
| H | 2.21575  | 2.52081  | 3.44007  |
| H | 1.25735  | 3.89525  | 2.90349  |
| H | -0.42705 | -1.84626 | 4.10302  |
| H | 0.10443  | -0.53693 | 5.15722  |
| H | 0.93739  | -2.08639 | 5.19556  |
| H | 3.36047  | 0.15277  | 3.36443  |
| H | 3.17212  | -0.91866 | 4.74977  |
| H | 2.34605  | 0.63334  | 4.72807  |
| H | 2.65762  | -1.87036 | 1.90402  |
| H | 1.11864  | -2.68288 | 2.20931  |
| H | 2.43509  | -2.82729 | 3.36984  |

Electronic Energy (Hartree): -1604.560063

Gibbs Free Energy (Hartree): -1604.200279

Negative Frequencies (cm<sup>-1</sup>): None

Molecular Dipole (Debye): 3.83

HOMO Energy (Hartree): -0.250261

LUMO Energy (Hartree): -0.035868

Coordinates (Charge 0, Multiplicity 1):

|    |          |          |          |
|----|----------|----------|----------|
| Hg | 0.13735  | -1.00643 | -3.21448 |
| Cl | -0.64129 | -2.25609 | -5.03330 |
| Si | 0.56187  | 0.22441  | 2.20116  |
| O  | 1.35414  | 0.26501  | 0.73228  |
| O  | -0.80666 | -0.55765 | 1.65580  |
| C  | -0.82269 | -0.59885 | 0.22353  |
| C  | 0.65522  | -0.52812 | -0.24349 |
| C  | 0.86083  | 0.12297  | -1.59574 |
| C  | 0.19958  | 2.00810  | 2.72654  |
| C  | 1.43801  | -0.90101 | 3.44745  |

### 6-endo cyclized mercuric chloride

Level of theory: B3LYP D3BJ RIJCOSX  
def2/TZVP SMD THF (SAS)

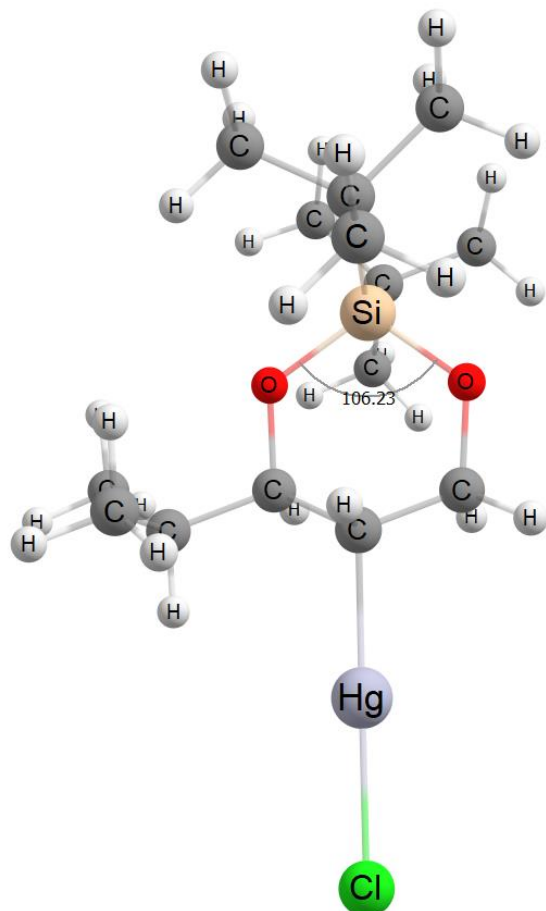

Electronic Energy (Hartree): -1604.560123

Gibbs Free Energy (Hartree): -1604.199463

Negative Frequencies (cm<sup>-1</sup>): None

Molecular Dipole (Debye): 3.19

HOMO Energy (Hartree): -0.245635

LUMO Energy (Hartree): -0.041196

Coordinates (Charge 0, Multiplicity 1):

|    |          |          |          |
|----|----------|----------|----------|
| Hg | 0.08554  | -1.30694 | -2.80936 |
| Cl | -0.29007 | -1.73791 | -5.07979 |
| Si | 0.71978  | 0.26463  | 2.00863  |
| O  | 1.75427  | 0.50162  | 0.73584  |
| O  | -0.56974 | -0.58250 | 1.40568  |
| C  | -0.86053 | -0.70528 | 0.00985  |
| C  | 0.44489  | -0.93450 | -0.75512 |
| C  | 1.40972  | 0.24028  | -0.62058 |
| C  | 0.13884  | 1.97116  | 2.60261  |
| C  | 1.56169  | -0.87168 | 3.26940  |
| C  | -1.93048 | -1.79447 | -0.15454 |
| C  | -1.43508 | -3.17985 | 0.25508  |
| C  | -3.19320 | -1.41325 | 0.61623  |
| H  | 0.93107  | -1.83775 | -0.38462 |

|   |          |          |          |
|---|----------|----------|----------|
| H | 2.34143  | 0.03361  | -1.15121 |
| H | 0.97493  | 1.14545  | -1.05952 |
| H | -2.18928 | -1.81892 | -1.22069 |
| H | -2.22937 | -3.91885 | 0.13594  |
| H | -0.58874 | -3.51776 | -0.34607 |
| H | -1.12898 | -3.18492 | 1.30202  |
| H | -3.56437 | -0.43161 | 0.31194  |
| H | -2.99610 | -1.37973 | 1.68827  |
| H | -3.98880 | -2.13934 | 0.43888  |
| H | -1.29751 | 0.24102  | -0.33510 |
| C | -0.76300 | 2.54984  | 1.49683  |
| C | 1.33281  | 2.91862  | 2.80038  |
| C | -0.67327 | 1.88818  | 3.90230  |
| C | 2.16690  | -2.05320 | 2.49137  |
| C | 0.53604  | -1.42502 | 4.27205  |
| C | 2.68513  | -0.14991 | 4.02714  |
| H | -0.23786 | 2.63896  | 0.54290  |
| H | -1.09518 | 3.55603  | 1.77454  |
| H | -1.65608 | 1.94240  | 1.34076  |
| H | -1.51076 | 1.19132  | 3.82080  |
| H | -1.09006 | 2.87115  | 4.14871  |
| H | -0.05953 | 1.57979  | 4.75005  |
| H | 1.94219  | 2.99368  | 1.89803  |
| H | 1.98467  | 2.60155  | 3.61535  |
| H | 0.97516  | 3.92499  | 3.04519  |
| H | -0.28771 | -1.93301 | 3.76761  |
| H | 0.10896  | -0.64622 | 4.90444  |
| H | 1.01754  | -2.15237 | 4.93489  |
| H | 3.42046  | 0.29105  | 3.35024  |
| H | 3.21817  | -0.85744 | 4.67176  |
| H | 2.30190  | 0.64341  | 4.67085  |
| H | 2.91881  | -1.72488 | 1.77221  |
| H | 1.40278  | -2.61547 | 1.95107  |
| H | 2.65099  | -2.74752 | 3.18654  |

### 5-exo cyclized mercuric triflate

Level of theory: B3LYP D3BJ RIJCOSX  
def2/TZVP SMD THF (SAS)

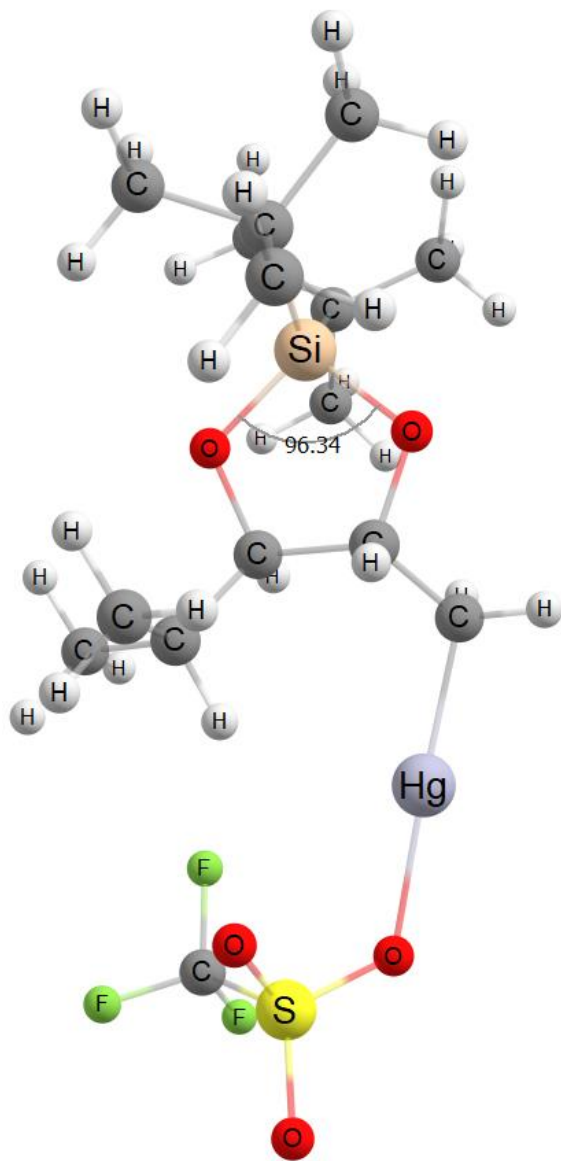

Electronic Energy (Hartree): -2105.868276

Gibbs Free Energy (Hartree): -2105.487946

Negative Frequencies ( $\text{cm}^{-1}$ ): None

Molecular Dipole (Debye): 7.60

HOMO Energy (Hartree): -0.253532

LUMO Energy (Hartree): -0.062637

Coordinates (Charge 0, Multiplicity 1):

|    |          |          |          |
|----|----------|----------|----------|
| Hg | 0.94606  | -0.39908 | -3.71972 |
| Si | 0.55932  | 0.04236  | 1.74013  |
| O  | 1.61465  | 0.28683  | 0.46523  |
| O  | -0.52549 | -0.90464 | 0.90214  |
| C  | -0.27875 | -0.84780 | -0.50471 |
| C  | 1.21482  | -0.45378 | -0.69314 |

|   |          |          |          |
|---|----------|----------|----------|
| C | 1.47944  | 0.44598  | -1.88695 |
| C | -0.18904 | 1.71563  | 2.21974  |
| C | 1.34339  | -0.99942 | 3.11145  |
| C | -0.71181 | -2.15640 | -1.16996 |
| C | -0.03648 | -3.39362 | -0.58385 |
| C | -2.23317 | -2.29185 | -1.12353 |
| H | 1.83580  | -1.35131 | -0.75580 |
| H | 2.53893  | 0.68221  | -1.96497 |
| H | 0.91531  | 1.37442  | -1.80645 |
| H | -0.42393 | -2.09538 | -2.22560 |
| H | -0.35033 | -4.28246 | -1.13304 |
| H | 1.05166  | -3.34694 | -0.64586 |
| H | -0.31389 | -3.52664 | 0.46212  |
| H | -2.72657 | -1.42944 | -1.57677 |
| H | -2.57918 | -2.37220 | -0.09146 |
| H | -2.55868 | -3.18272 | -1.66290 |
| H | -0.88955 | -0.03738 | -0.92476 |
| C | -1.03865 | 2.20096  | 1.03224  |
| C | 0.92308  | 2.74582  | 2.47805  |
| C | -1.09266 | 1.60650  | 3.45644  |
| C | 2.18932  | -2.09314 | 2.43651  |
| C | 0.24542  | -1.67382 | 3.95170  |
| C | 2.25225  | -0.16564 | 4.02567  |
| H | -0.43926 | 2.32728  | 0.12846  |
| H | -1.47983 | 3.17587  | 1.26464  |
| H | -1.85653 | 1.51413  | 0.80796  |
| H | -1.88745 | 0.86915  | 3.32084  |
| H | -1.57444 | 2.57024  | 3.65370  |
| H | -0.53397 | 1.33842  | 4.35415  |
| H | 1.59222  | 2.84086  | 1.62062  |
| H | 1.52993  | 2.49529  | 3.34871  |
| H | 0.48231  | 3.73137  | 2.66373  |
| H | -0.43000 | -2.26836 | 3.33391  |
| H | -0.35722 | -0.95286 | 4.50545  |
| H | 0.70062  | -2.34714 | 4.68608  |
| H | 3.03719  | 0.34967  | 3.46708  |
| H | 2.74705  | -0.81763 | 4.75352  |
| H | 1.69539  | 0.58199  | 4.59216  |
| H | 2.99721  | -1.67054 | 1.83665  |
| H | 1.58677  | -2.73293 | 1.79093  |
| H | 2.64321  | -2.73419 | 3.19967  |
| S | -0.21570 | -2.53439 | -5.68638 |
| C | -2.02241 | -2.10580 | -5.55122 |
| O | -0.04933 | -3.14079 | -6.97017 |
| O | 0.40310  | -1.14745 | -5.63374 |
| O | 0.07470  | -3.28169 | -4.48691 |
| F | -2.75702 | -3.21585 | -5.48964 |
| F | -2.42430 | -1.37800 | -6.59259 |
| F | -2.23652 | -1.39270 | -4.42969 |

### 6-endo cyclized mercuric triflate

Level of theory: B3LYP D3BJ RIJCOSX  
def2/TZVP SMD THF (SAS)

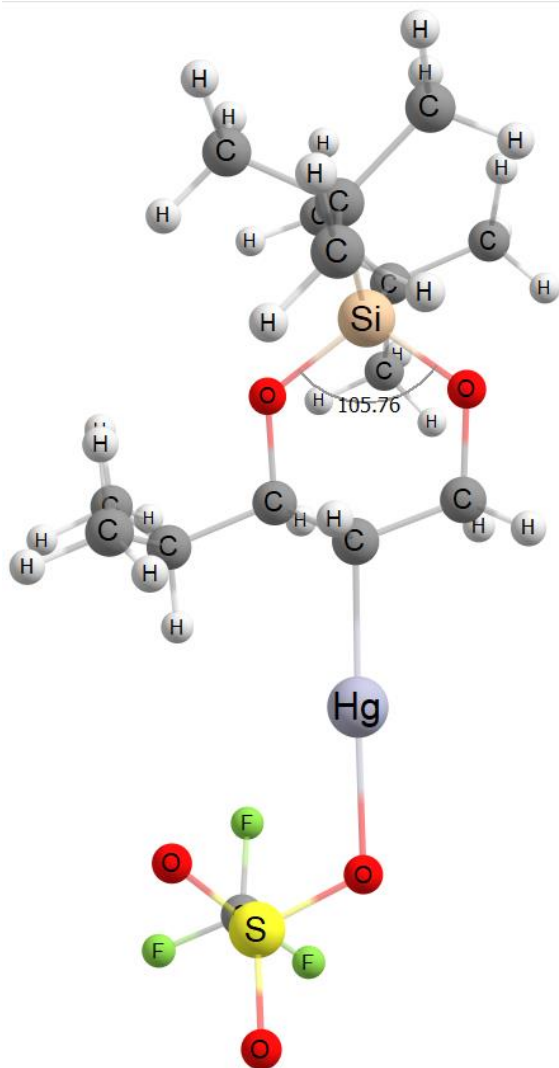

Electronic Energy (Hartree): -2105.866730  
Gibbs Free Energy (Hartree): -2105.484855  
Negative Frequencies (cm<sup>-1</sup>): None  
Molecular Dipole (Debye): 7.36  
HOMO Energy (Hartree): -0.251196  
LUMO Energy (Hartree): -0.067290  
Coordinates (Charge 0, Multiplicity 1):  
Hg 1.21151 -1.20659 -3.08408  
Si 0.88291 0.32398 1.75318  
O 2.07122 0.71721 0.66197  
O -0.16998 -0.66482 0.93618  
C -0.22763 -0.76903 -0.48561  
C 1.20849 -0.81830 -1.01770  
C 1.98511 0.46490 -0.73169

|   |          |          |          |
|---|----------|----------|----------|
| C | -0.00157 | 1.92649  | 2.24845  |
| C | 1.65409  | -0.73364 | 3.12050  |
| C | -1.11778 | -1.96620 | -0.84810 |
| C | -0.53274 | -3.30264 | -0.39741 |
| C | -2.52288 | -1.76110 | -0.28495 |
| H | 1.73591  | -1.66751 | -0.58332 |
| H | 3.00608  | 0.39013  | -1.11088 |
| H | 1.50894  | 1.31822  | -1.22790 |
| H | -1.20155 | -1.97755 | -1.94209 |
| H | -1.20648 | -4.11833 | -0.66350 |
| H | 0.42883  | -3.52110 | -0.86592 |
| H | -0.39573 | -3.31941 | 0.68460  |
| H | -2.95424 | -0.81589 | -0.62339 |
| H | -2.50598 | -1.75152 | 0.80540  |
| H | -3.18756 | -2.56394 | -0.60827 |
| H | -0.70838 | 0.13380  | -0.88387 |
| C | -0.78344 | 2.41375  | 1.01467  |
| C | 1.01221  | 3.01253  | 2.64242  |
| C | -0.99284 | 1.70557  | 3.39970  |
| C | 2.51158  | -1.81444 | 2.43858  |
| C | 0.56238  | -1.43085 | 3.94873  |
| C | 2.55078  | 0.09914  | 4.04773  |
| H | -0.13046 | 2.59264  | 0.15723  |
| H | -1.28117 | 3.36290  | 1.24011  |
| H | -1.55646 | 1.70378  | 0.71573  |
| H | -1.70787 | 0.90905  | 3.18124  |
| H | -1.56869 | 2.62005  | 3.57940  |
| H | -0.48719 | 1.45774  | 4.33412  |
| H | 1.73959  | 3.19406  | 1.84920  |
| H | 1.56474  | 2.75694  | 3.54712  |
| H | 0.49108  | 3.95624  | 2.83745  |
| H | -0.10889 | -2.01899 | 3.32051  |
| H | -0.04533 | -0.72505 | 4.51538  |
| H | 1.02278  | -2.11396 | 4.67071  |
| H | 3.32120  | 0.64292  | 3.49626  |
| H | 3.06168  | -0.55556 | 4.76198  |
| H | 1.97859  | 0.82301  | 4.63001  |
| H | 3.32050  | -1.38108 | 1.84843  |
| H | 1.91419  | -2.45156 | 1.78324  |
| H | 2.96353  | -2.46272 | 3.19661  |
| S | 0.32217  | -2.68137 | -5.66217 |
| O | 1.24469  | -1.57269 | -5.18320 |
| O | 0.80944  | -3.30769 | -6.85140 |
| O | -0.13696 | -3.48294 | -4.55198 |
| C | -1.16429 | -1.68942 | -6.18074 |
| F | -2.14189 | -2.50235 | -6.58056 |
| F | -0.86109 | -0.85641 | -7.17592 |
| F | -1.61230 | -0.96316 | -5.14127 |

## XII. NMR Spectra

Compound 4 ( $^1\text{H}$  NMR: 400 MHz,  $^{13}\text{C}\{^1\text{H}\}$  NMR: 100 MHz)

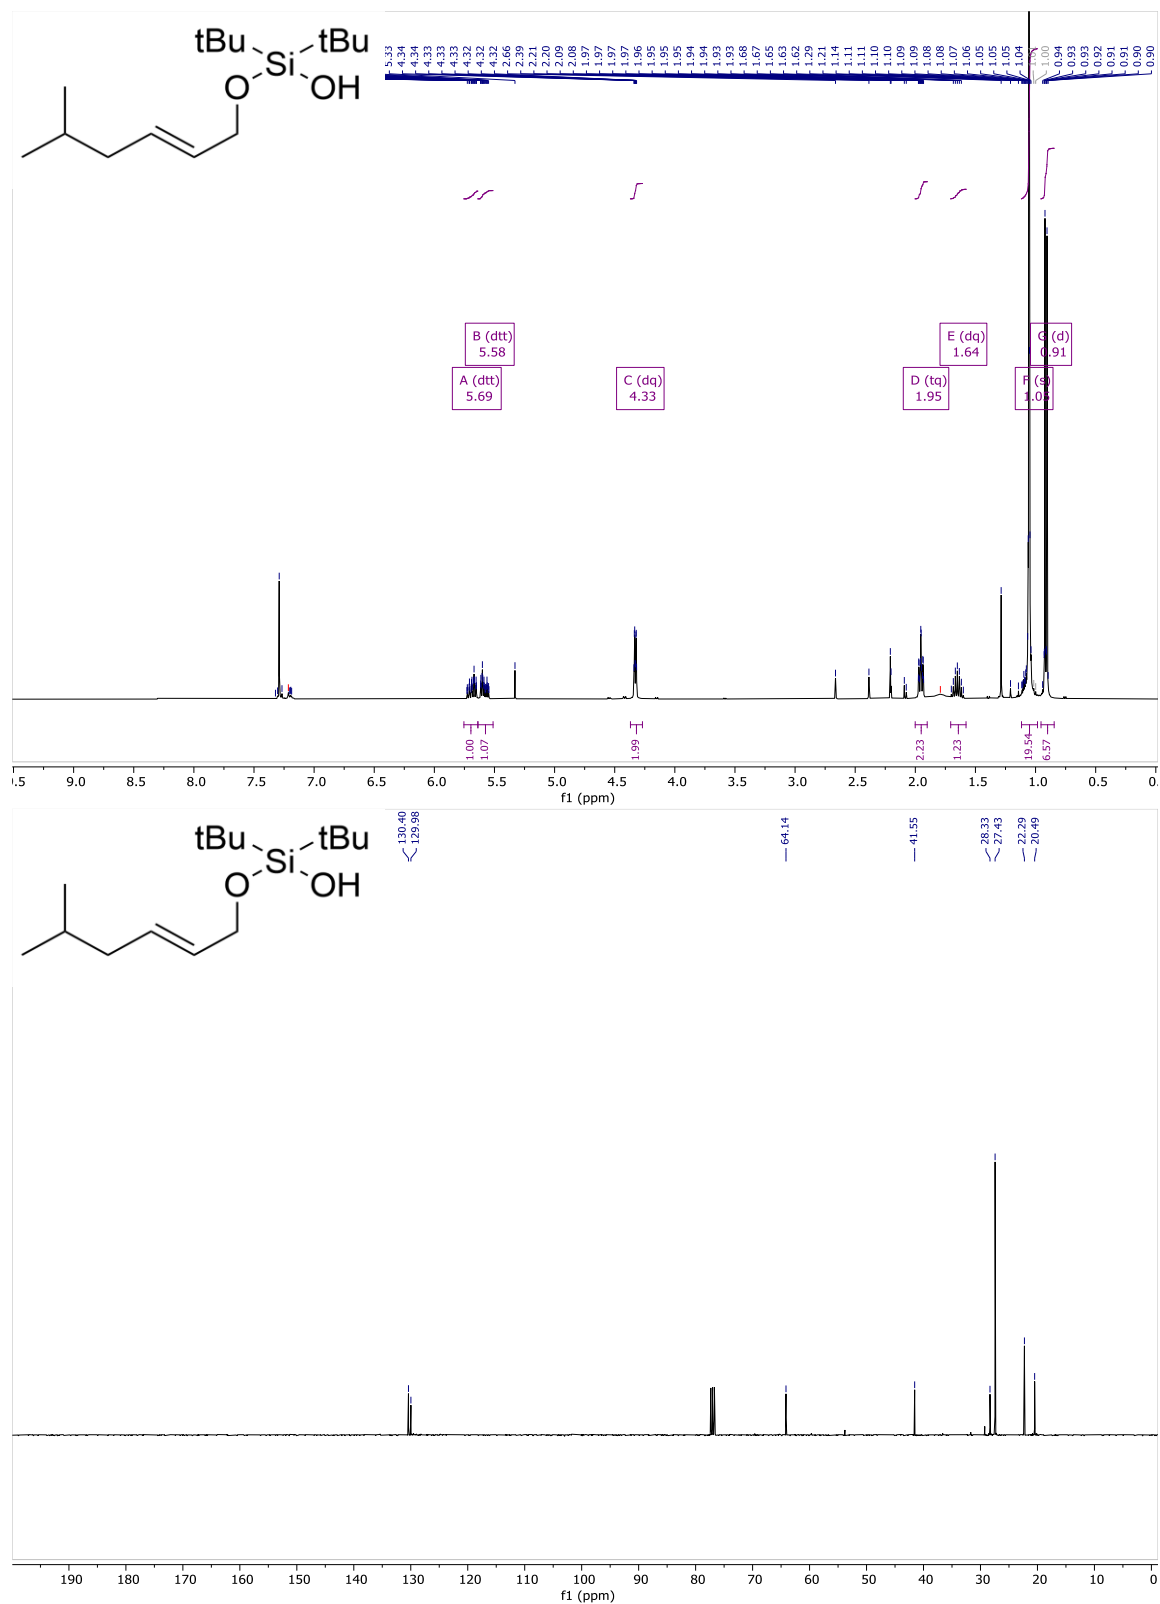

Compound 6 ( $^1\text{H}$  NMR: 400 MHz,  $^{13}\text{C}\{^1\text{H}\}$  NMR: 100 MHz)

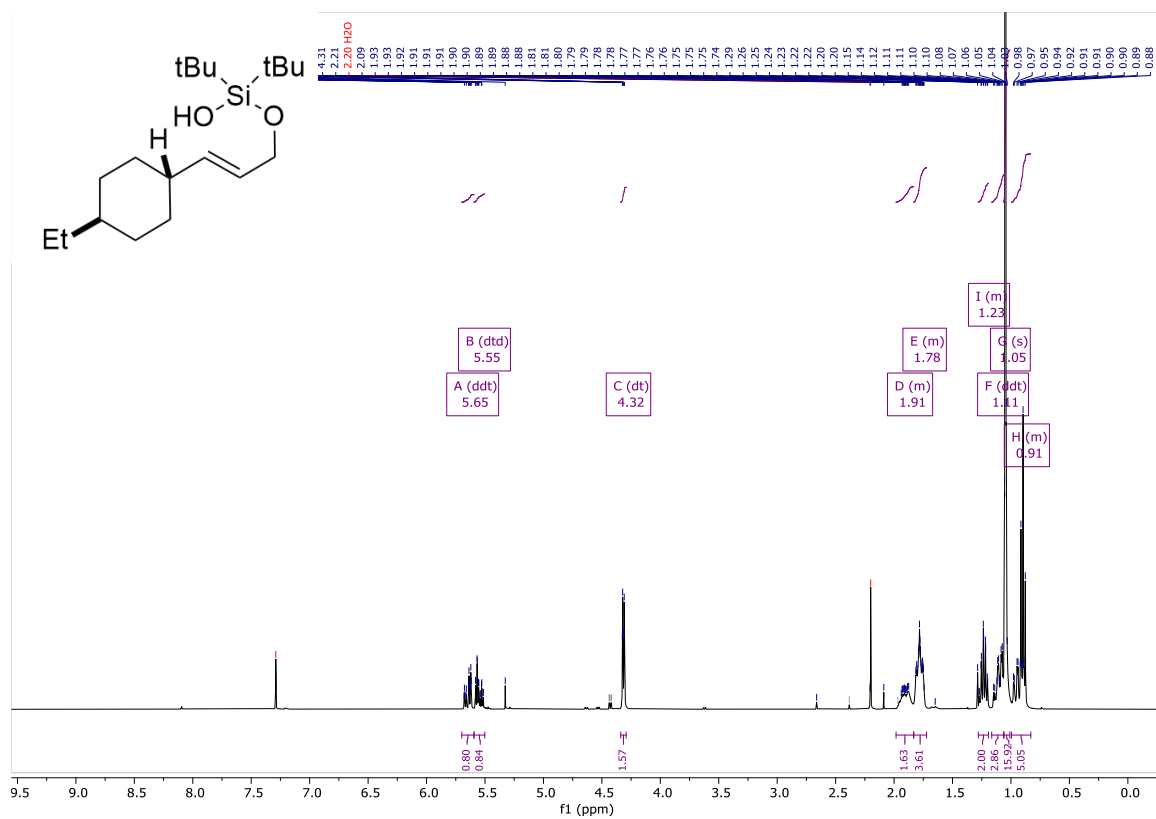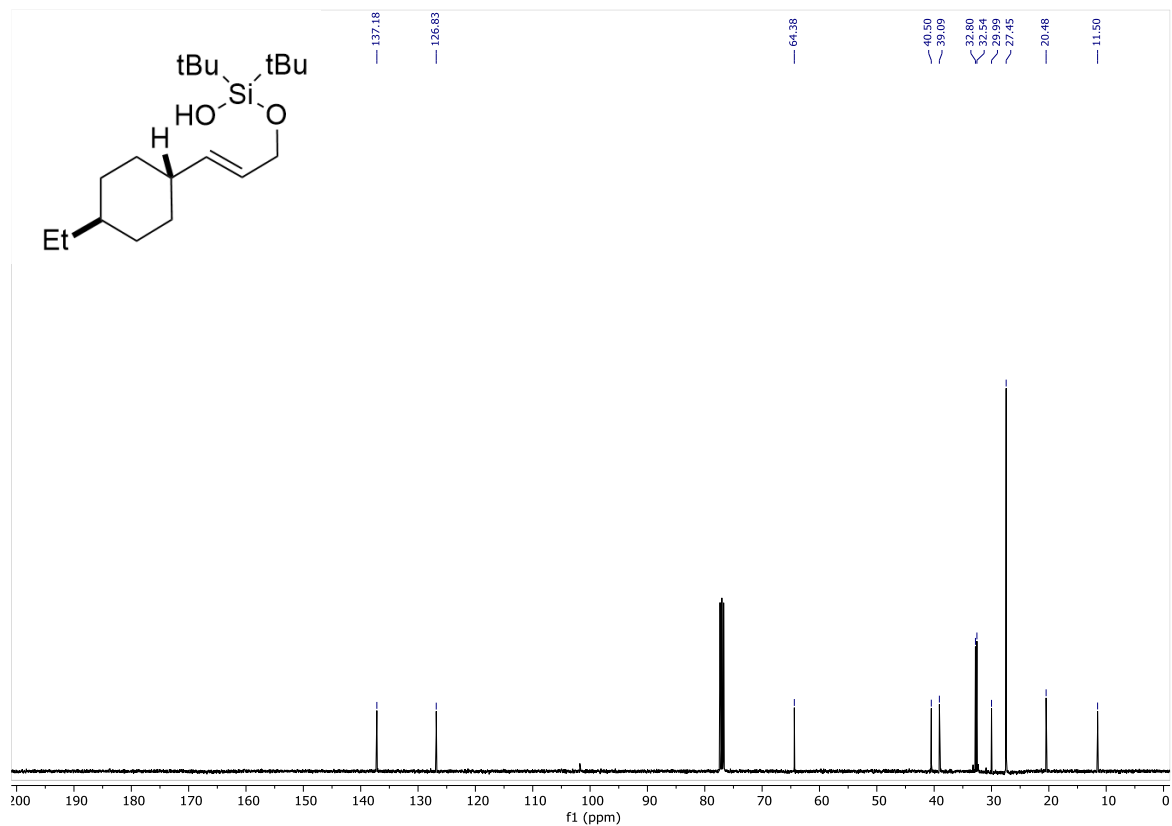



Compound 9 ( $^1\text{H}$  NMR: 400 MHz,  $^{13}\text{C}\{^1\text{H}\}$  NMR: 100 MHz)

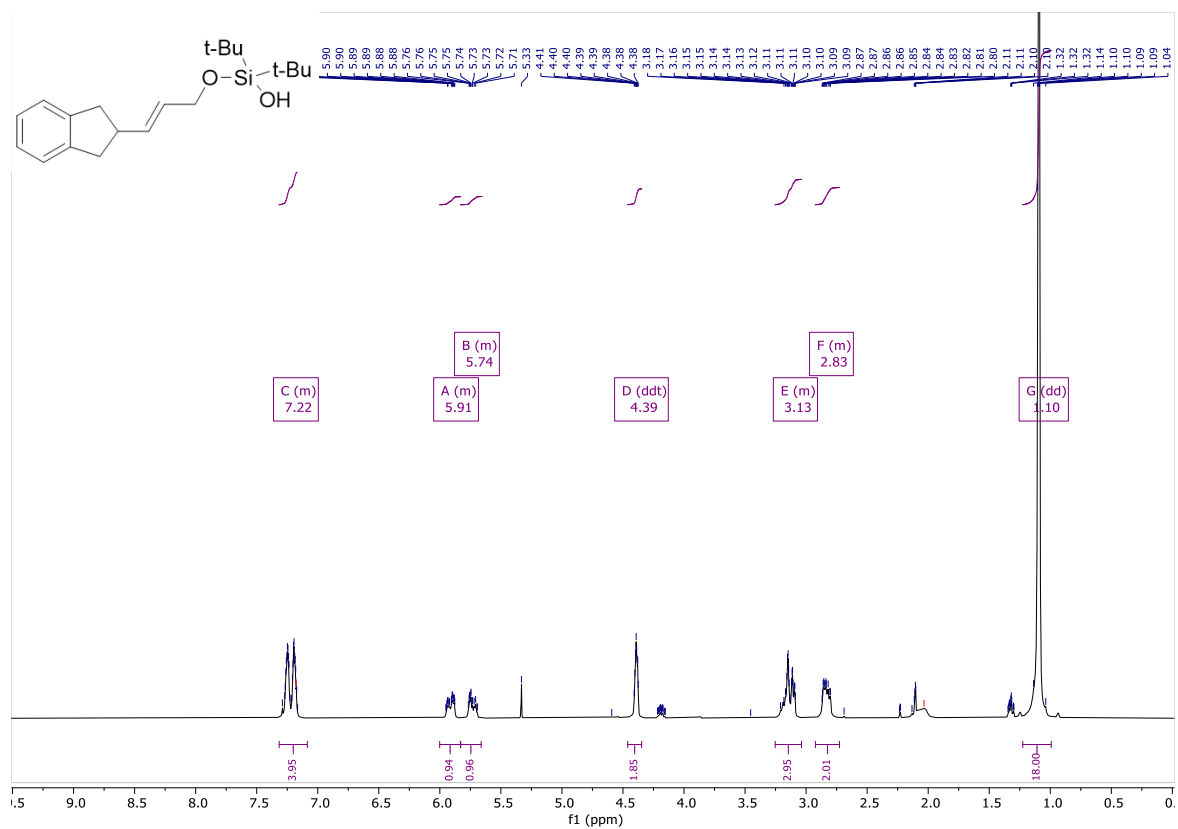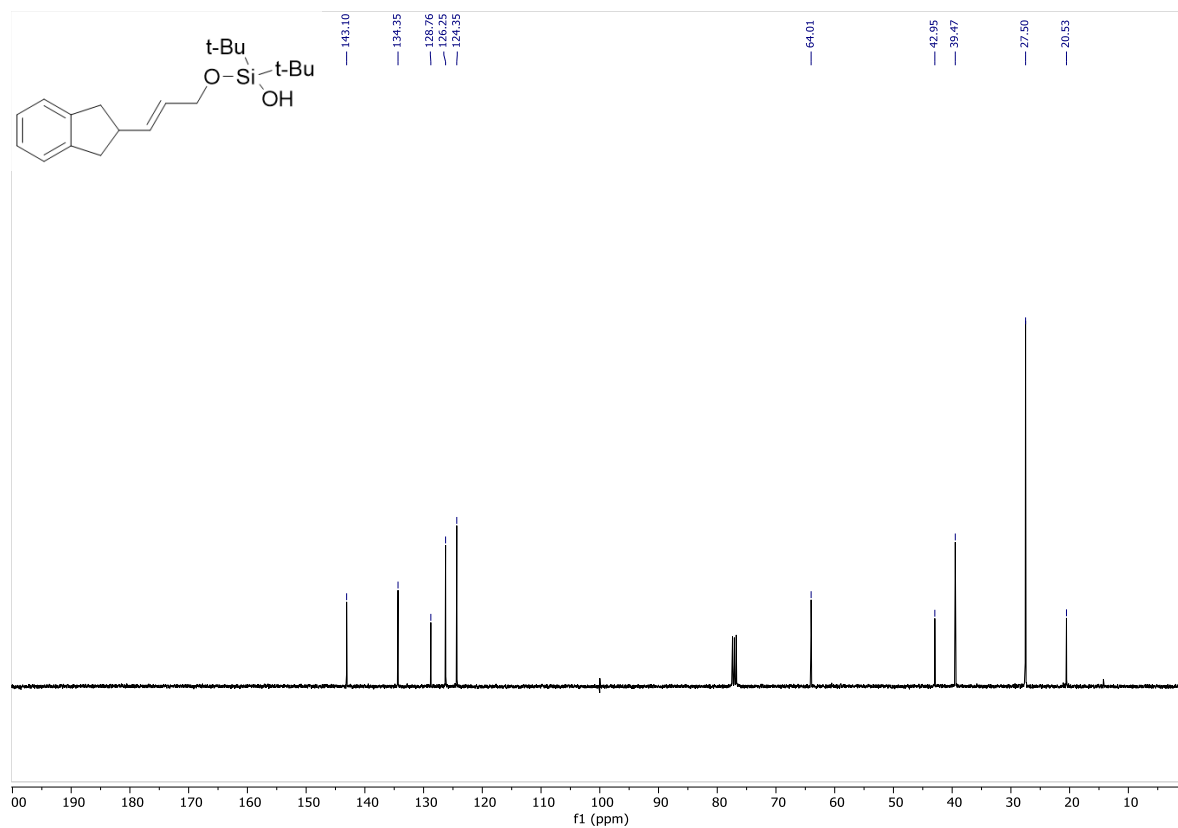

Compound 11 ( $^1\text{H}$  NMR: 400 MHz,  $^{13}\text{C}\{^1\text{H}\}$  NMR: 100 MHz)

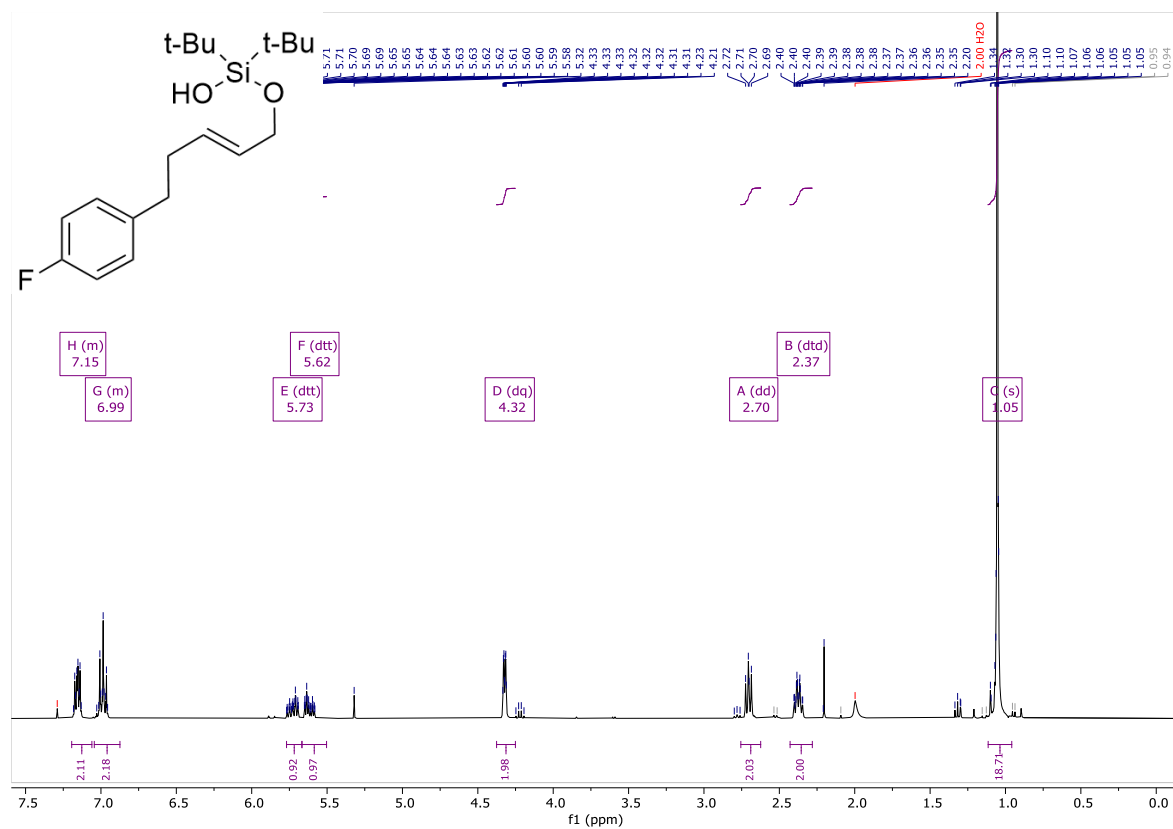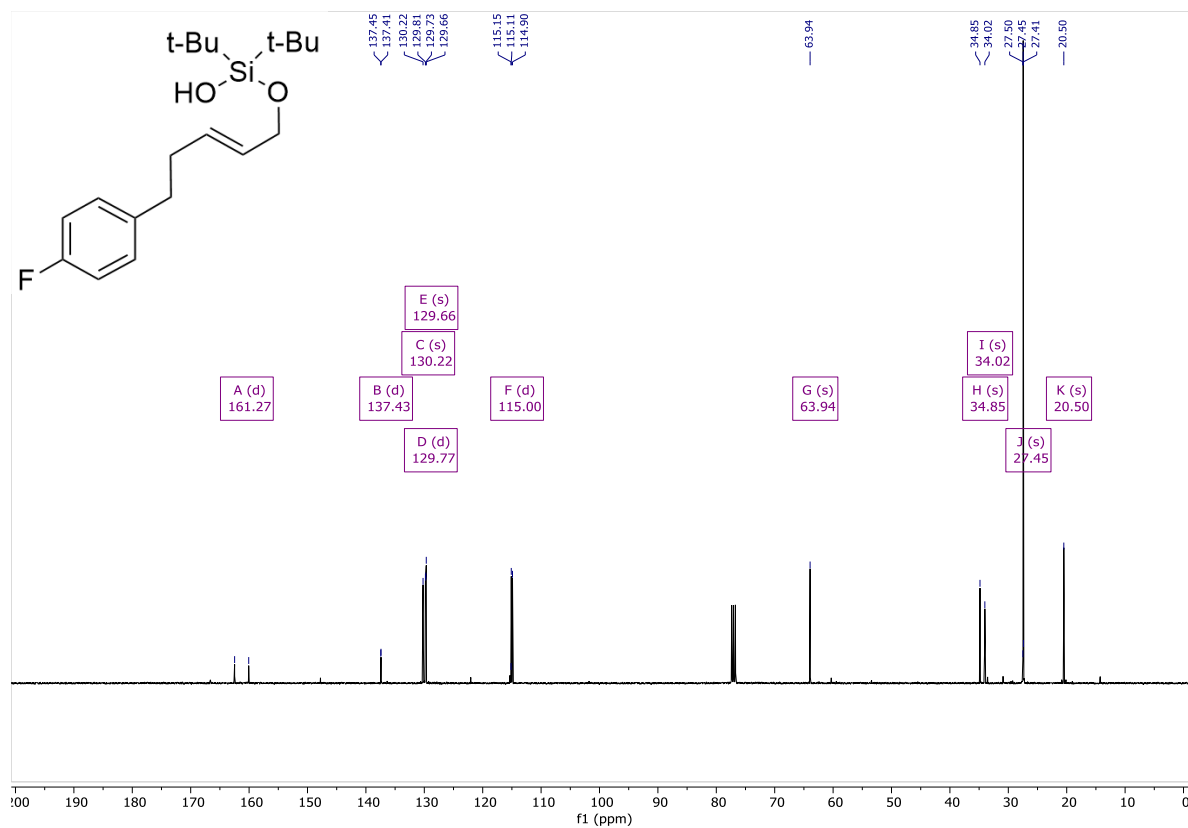

Compound 12 (<sup>1</sup>H NMR: 400 MHz, <sup>13</sup>C{<sup>1</sup>H} NMR: 100 MHz)

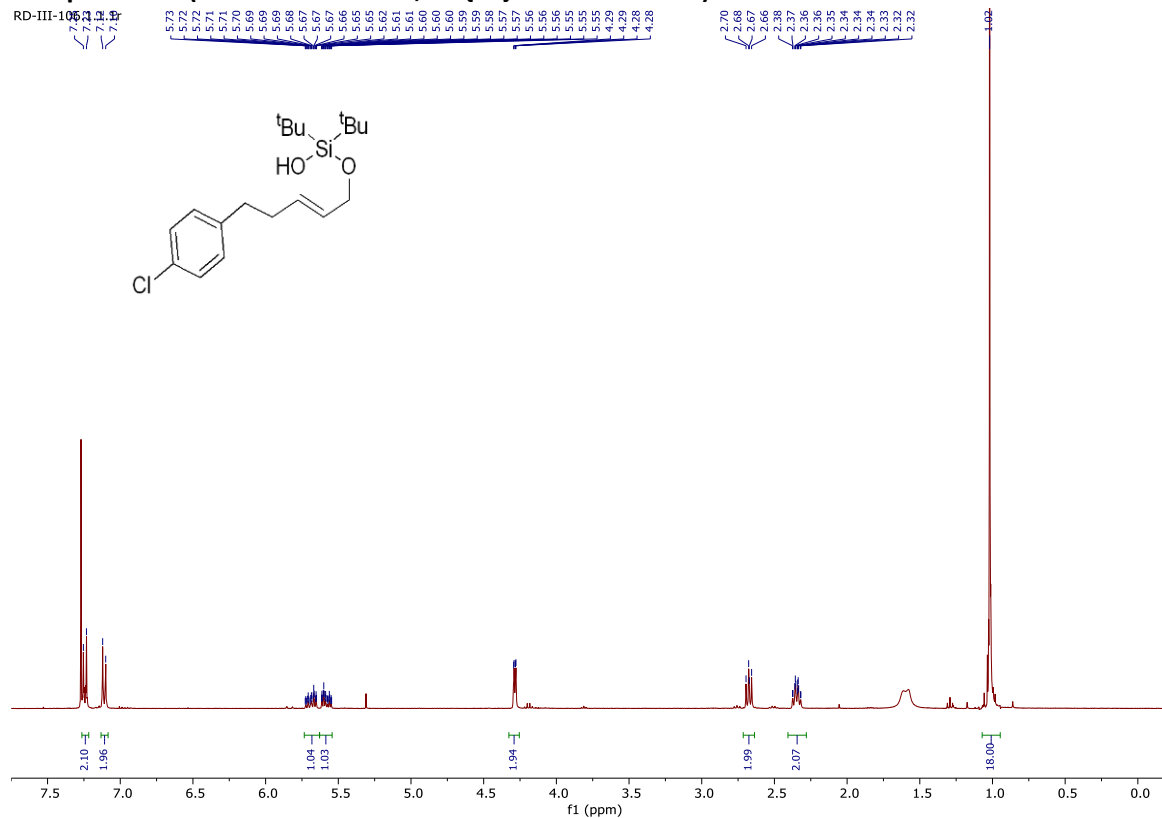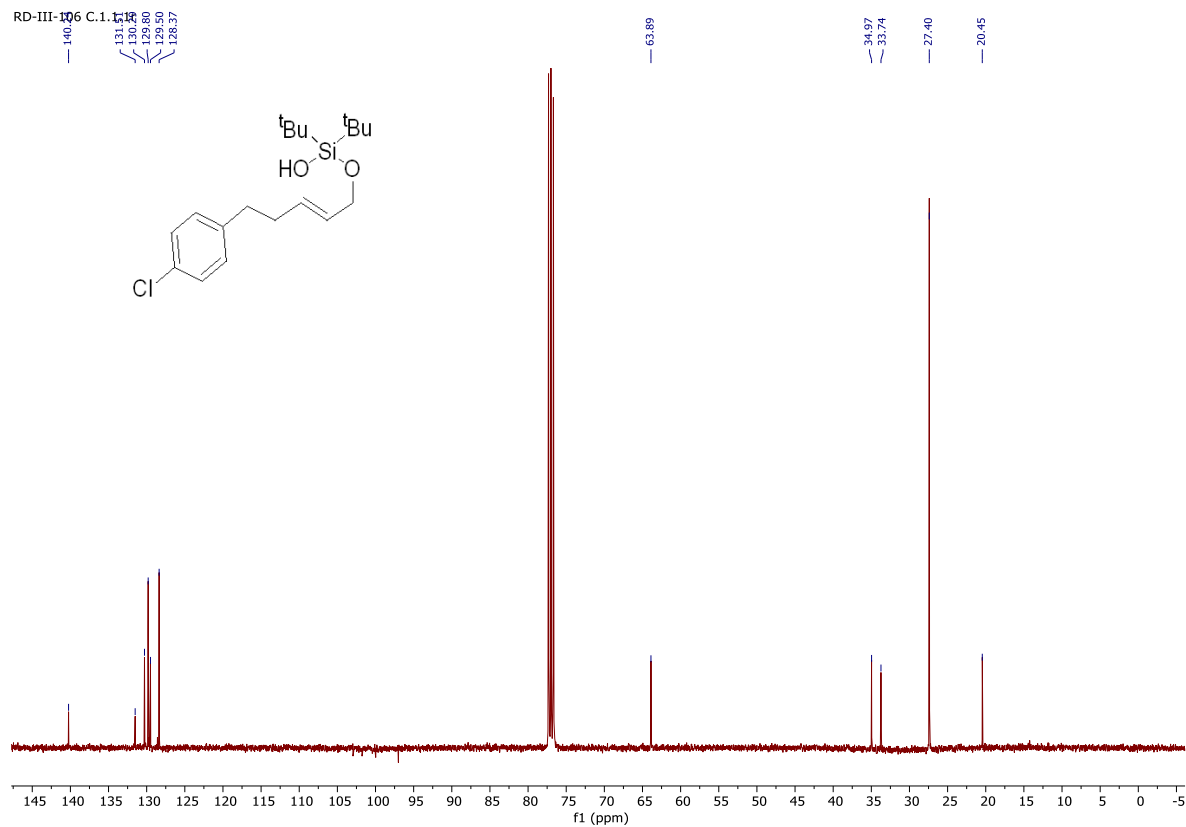

Compound 13 ( $^1\text{H}$  NMR: 400 MHz,  $^{13}\text{C}$  NMR: 100 MHz)

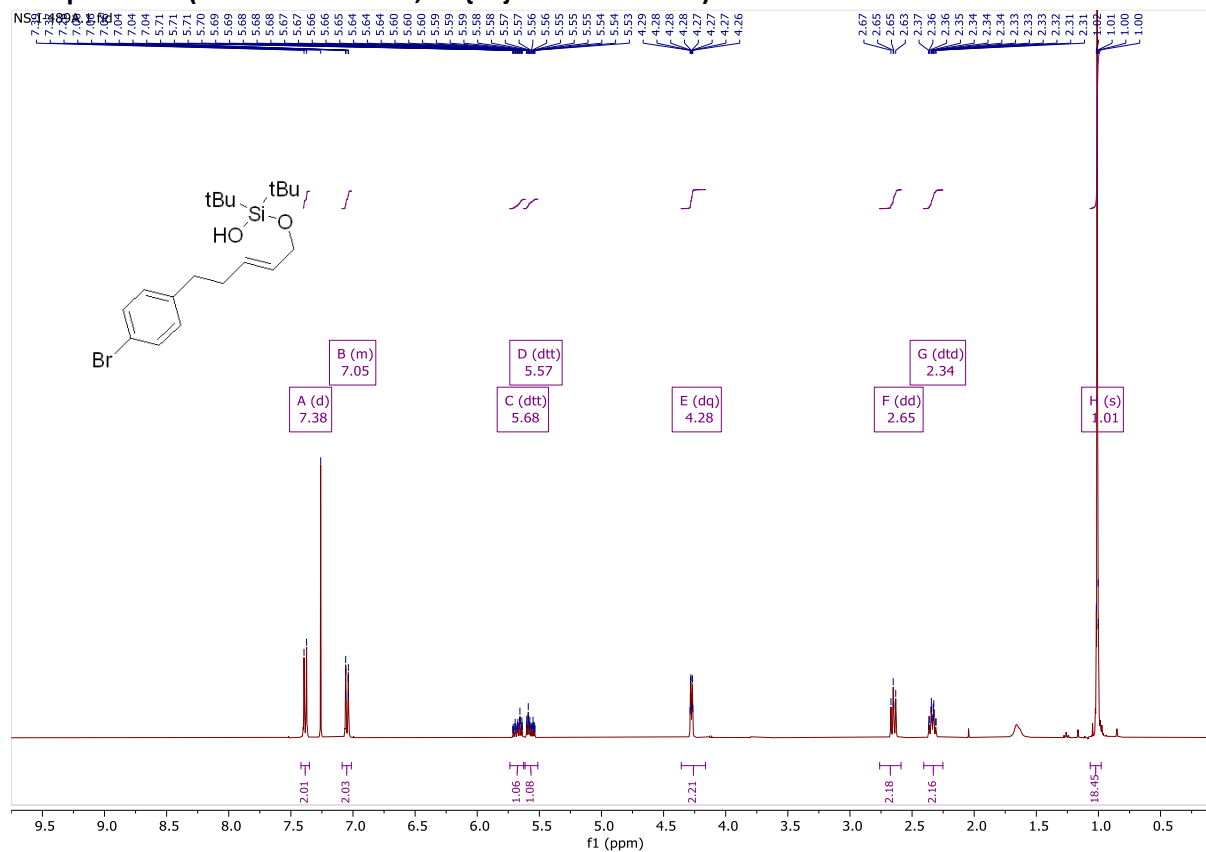

NS-I-489.2.fid

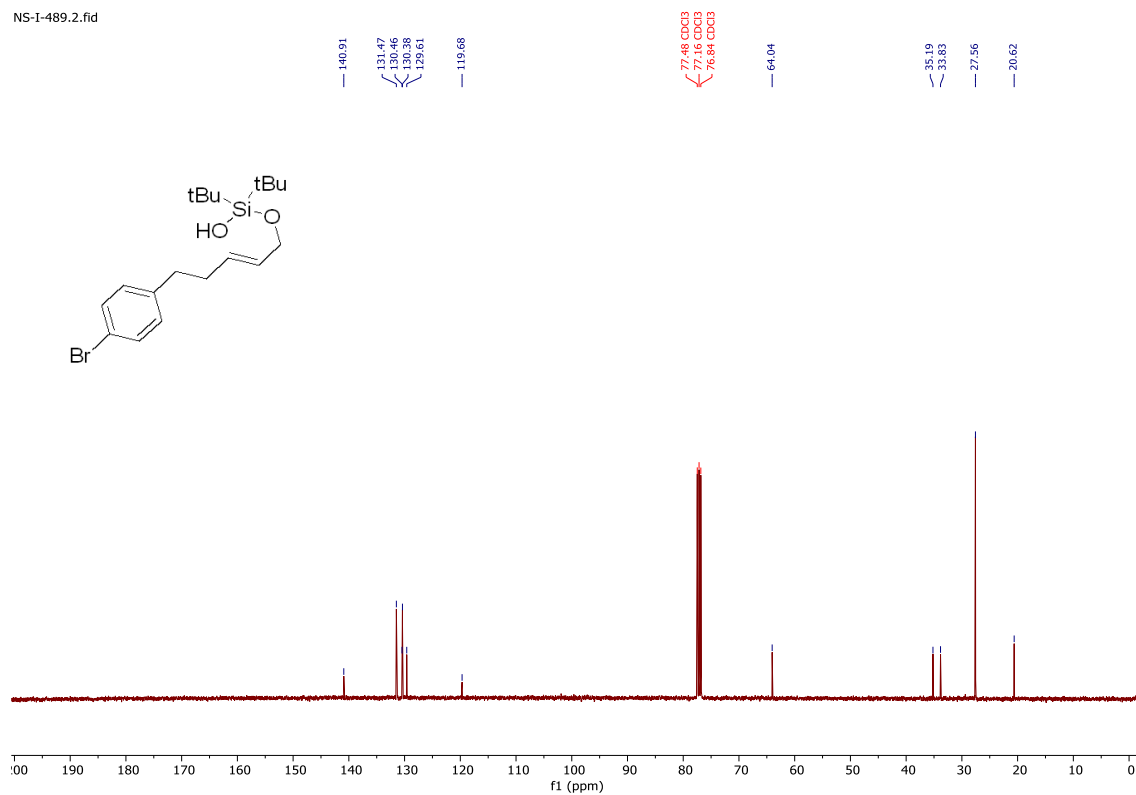

Compound 14 ( $^1\text{H}$  NMR: 600 MHz,  $^{13}\text{C}\{^1\text{H}\}$  NMR: 150 MHz)

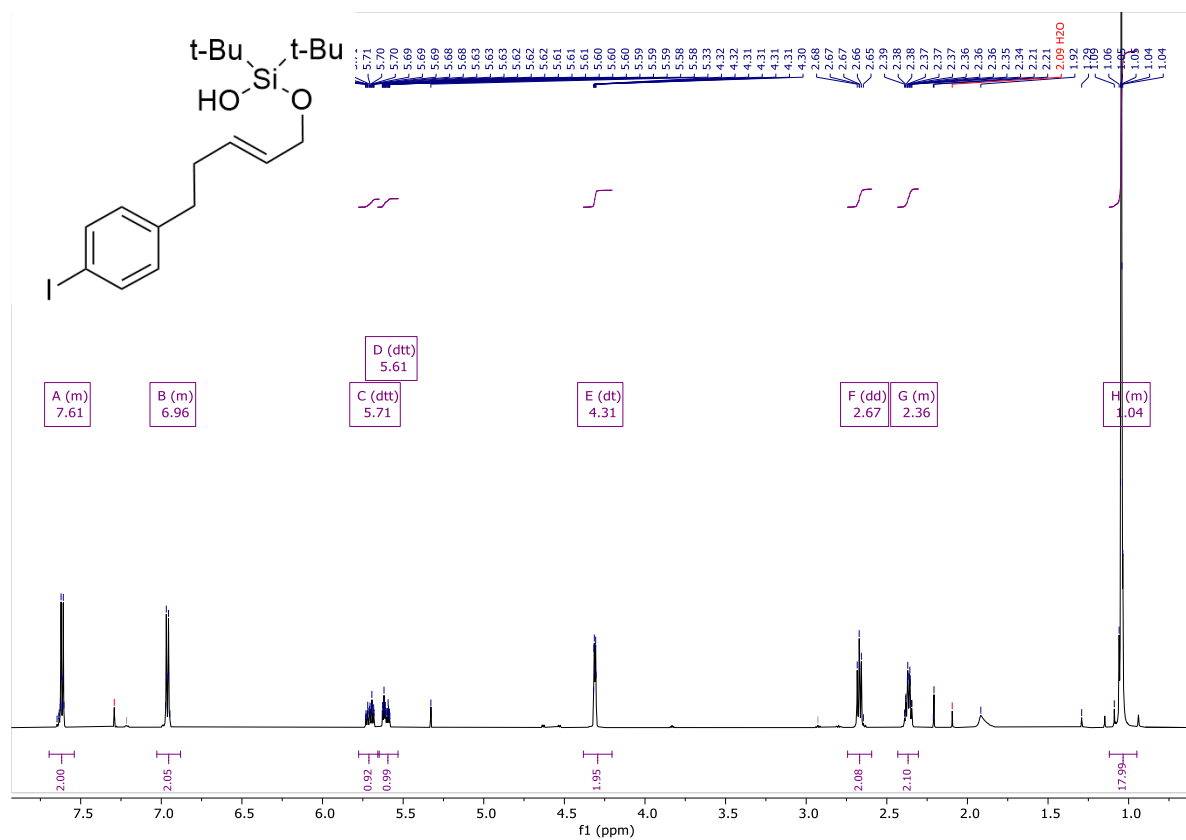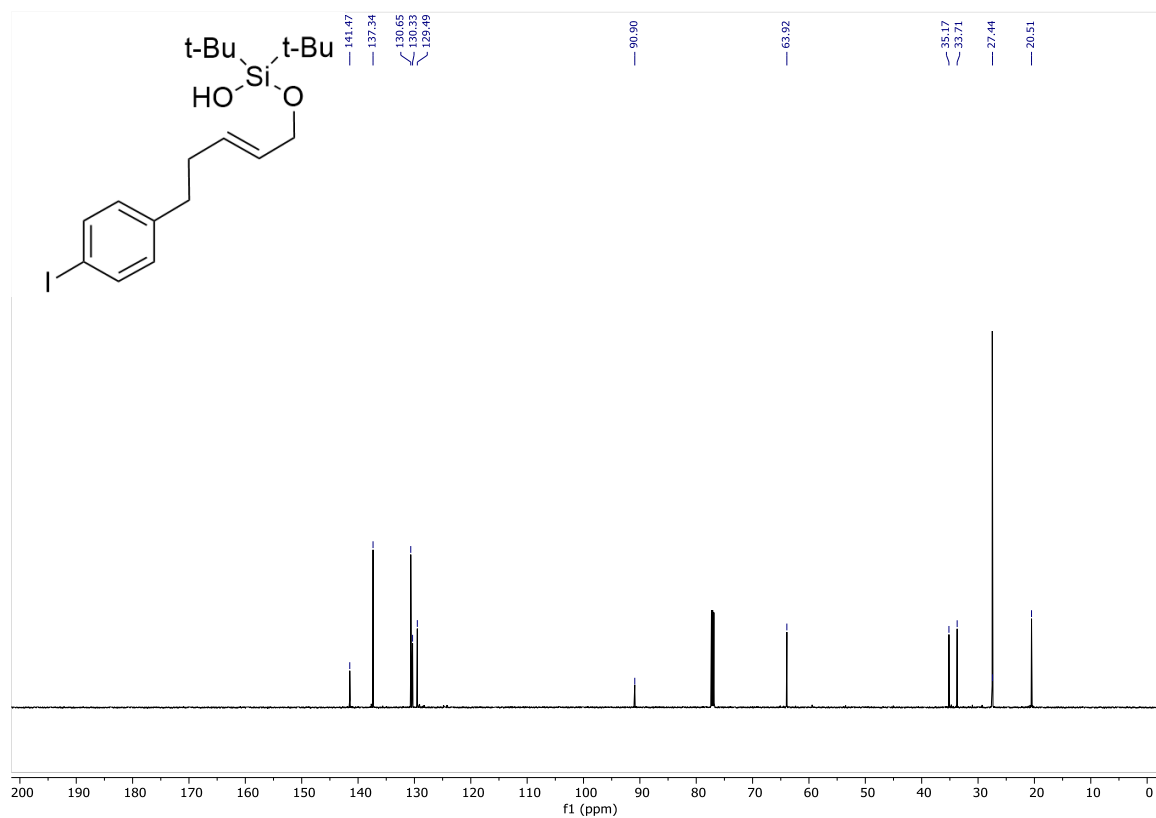

Compound 15 ( $^1\text{H}$  NMR: 400 MHz,  $^{13}\text{C}\{^1\text{H}\}$  NMR: 100 MHz)

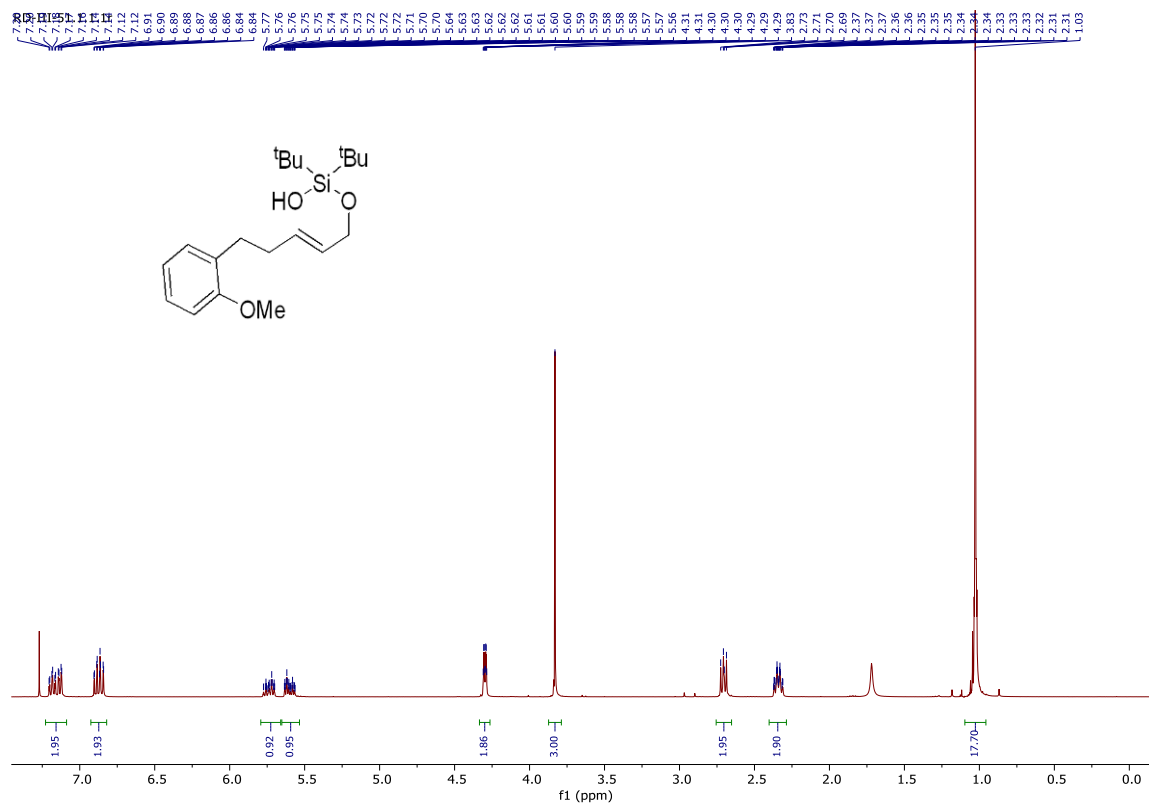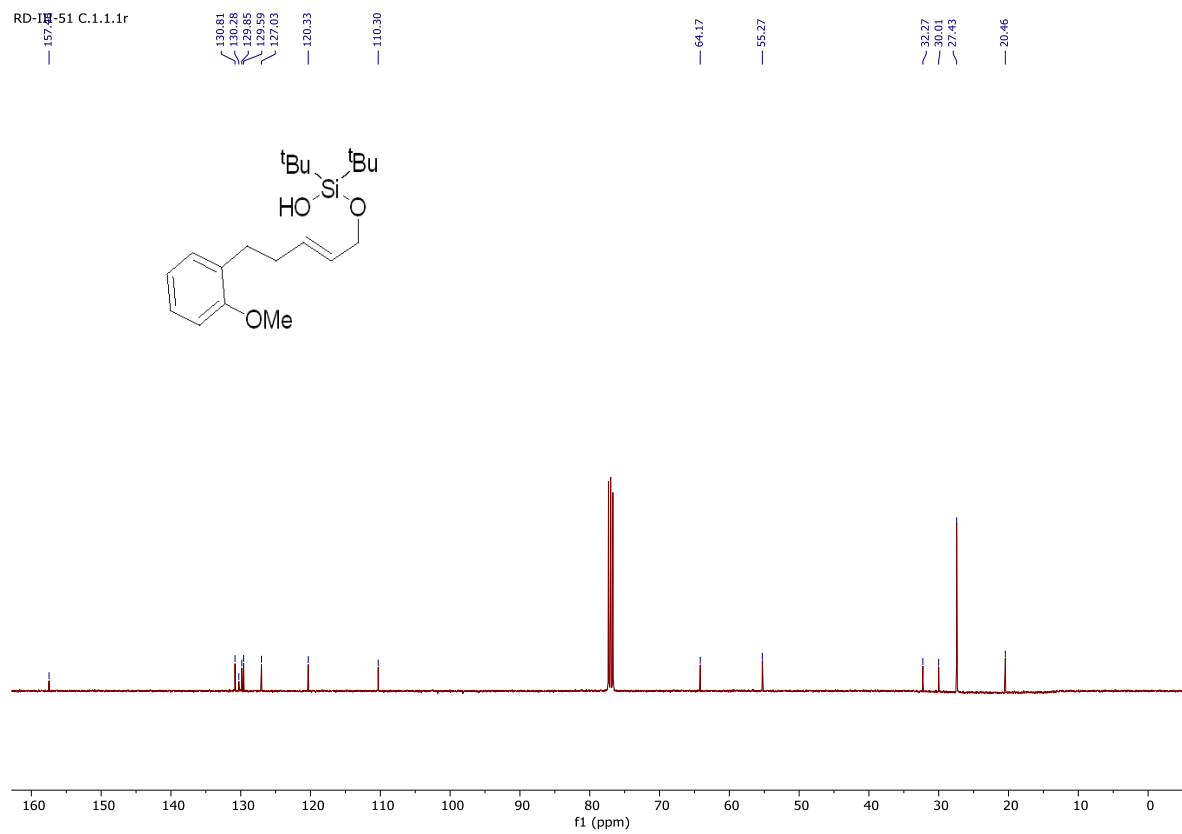

Compound 16 ( $^1\text{H}$  NMR: 400 MHz,  $^{13}\text{C}$  NMR: 100 MHz)

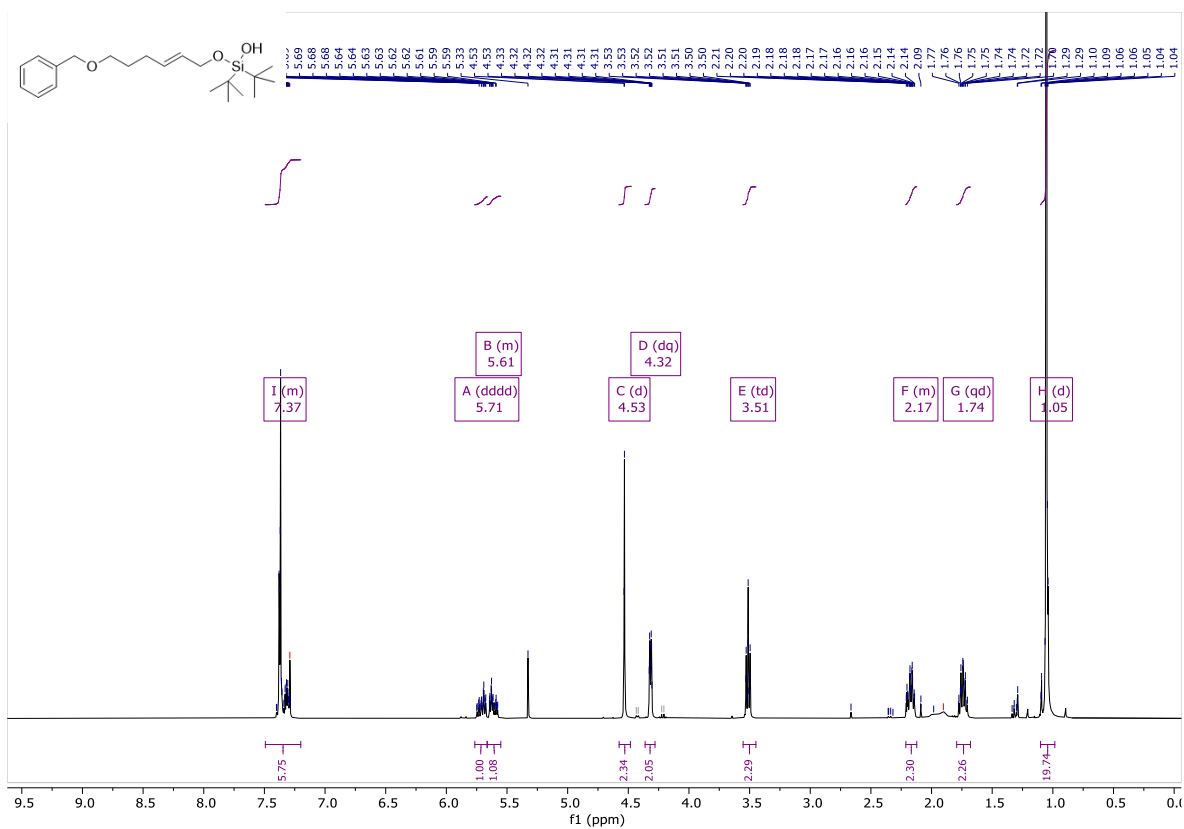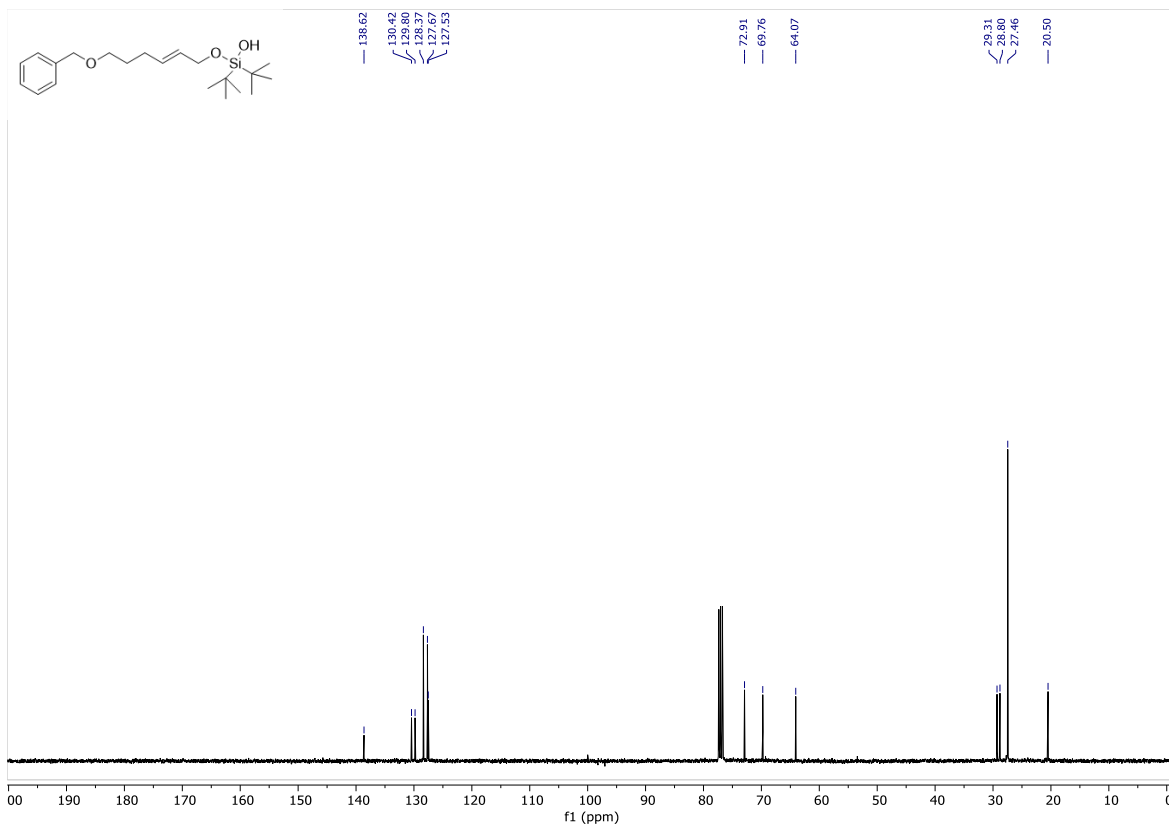

Compound 17 ( $^1\text{H}$  NMR: 400 MHz,  $^{13}\text{C}$ {H} NMR: 100 MHz)

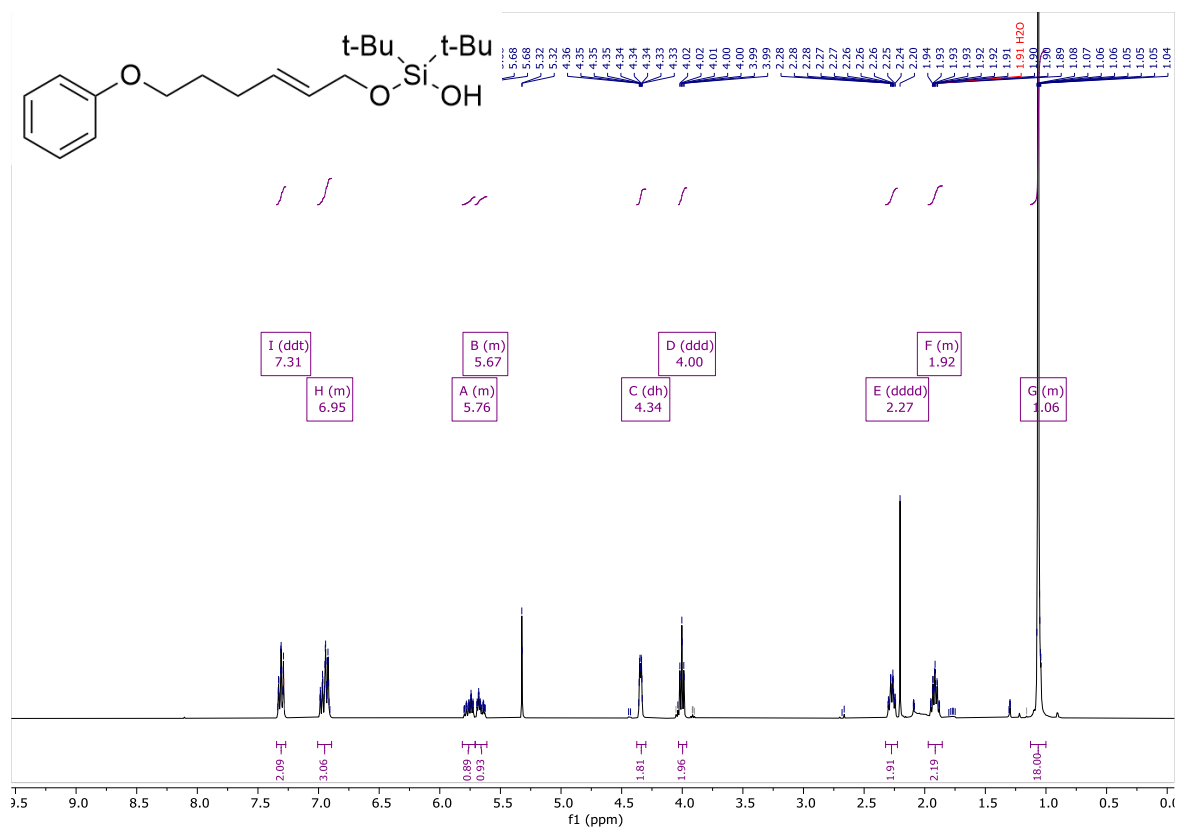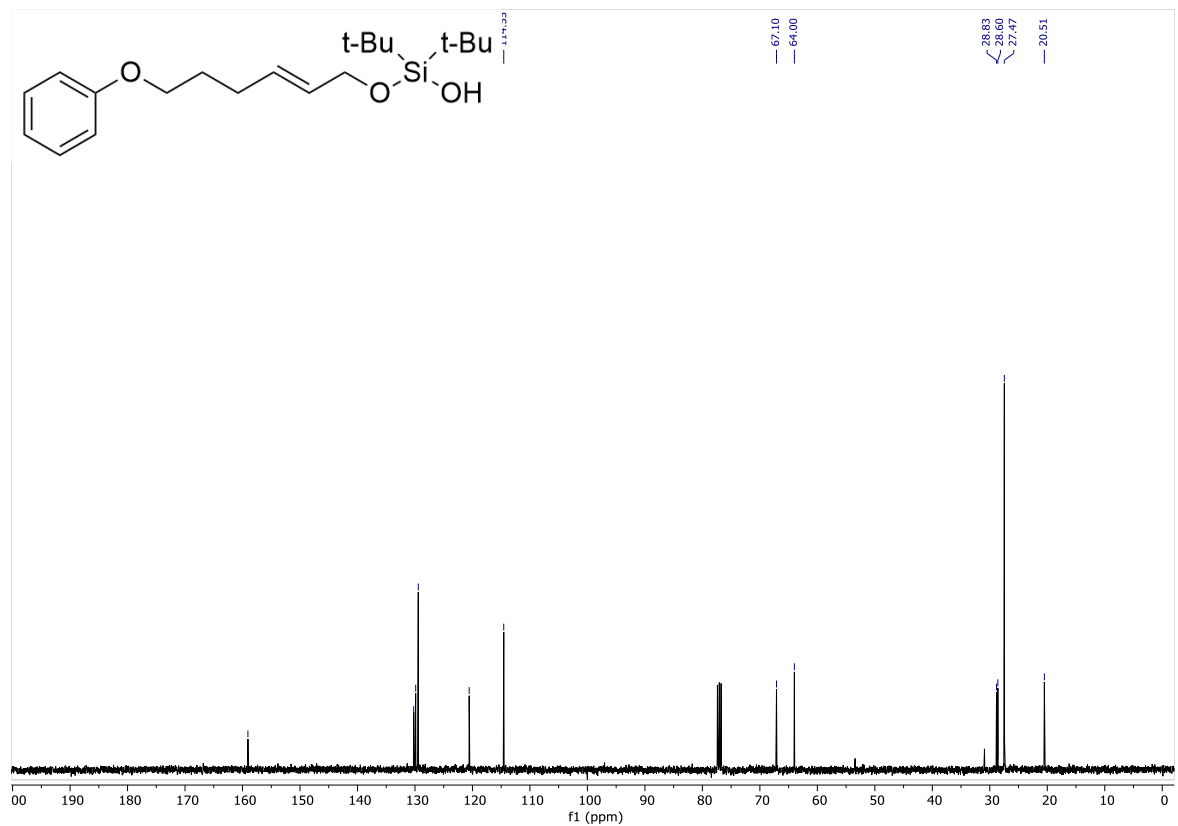



Compound 20 ( $^1\text{H}$  NMR: 400 MHz,  $^{13}\text{C}\{^1\text{H}\}$  NMR: 100 MHz)

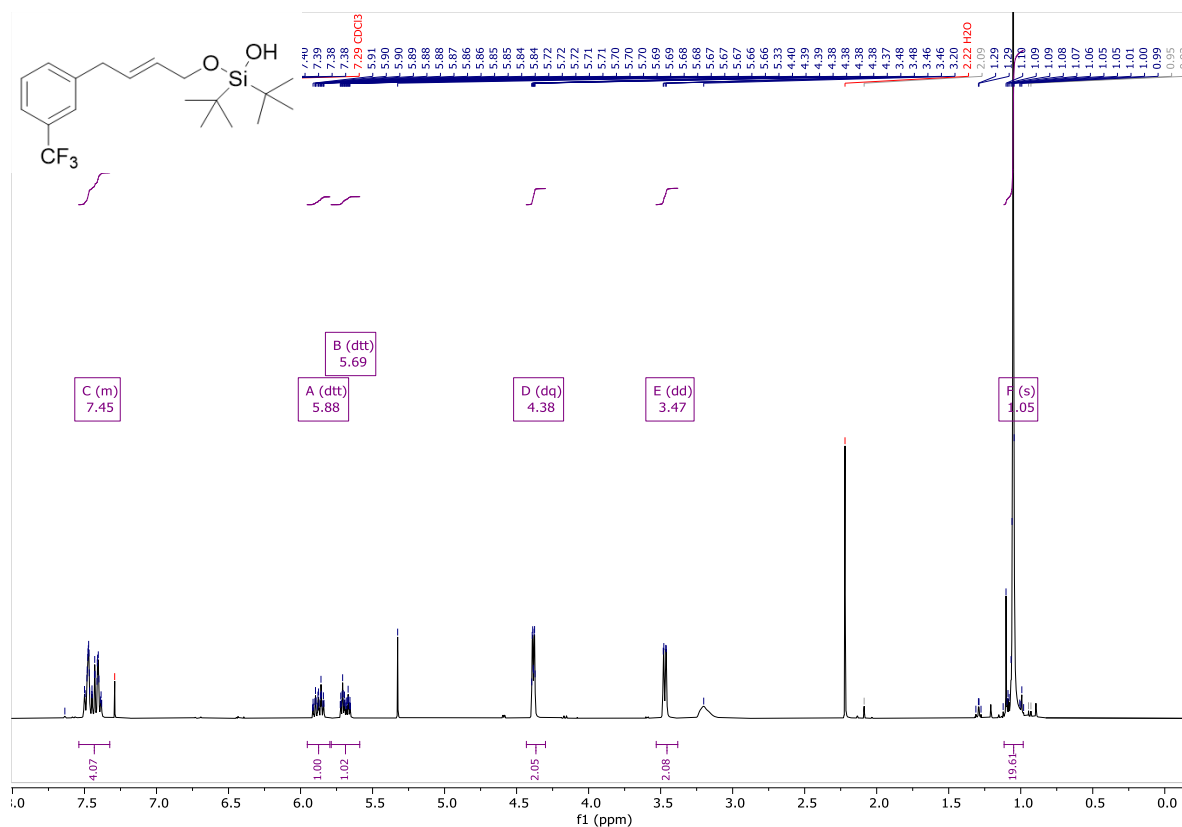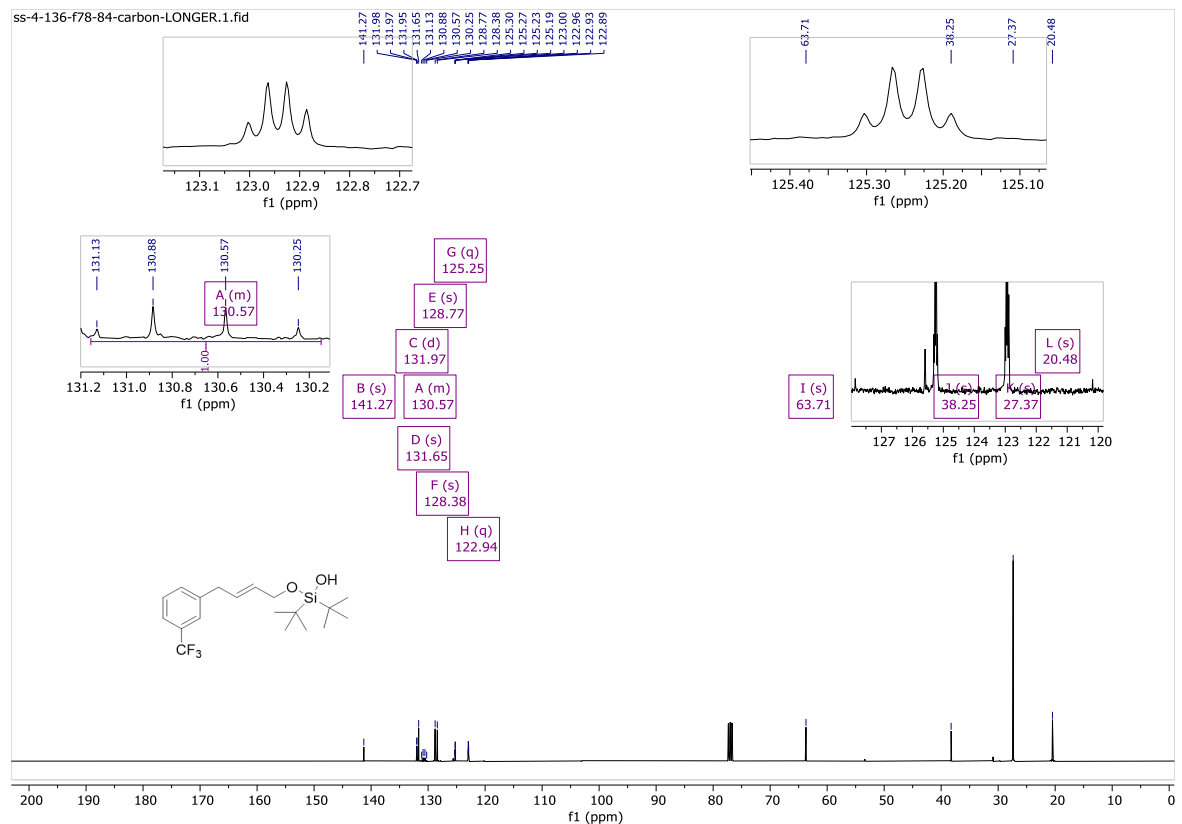

Compound 24 ( $^1\text{H}$  NMR: 400 MHz,  $^{13}\text{C}$ { $^1\text{H}$ } NMR: 100 MHz)

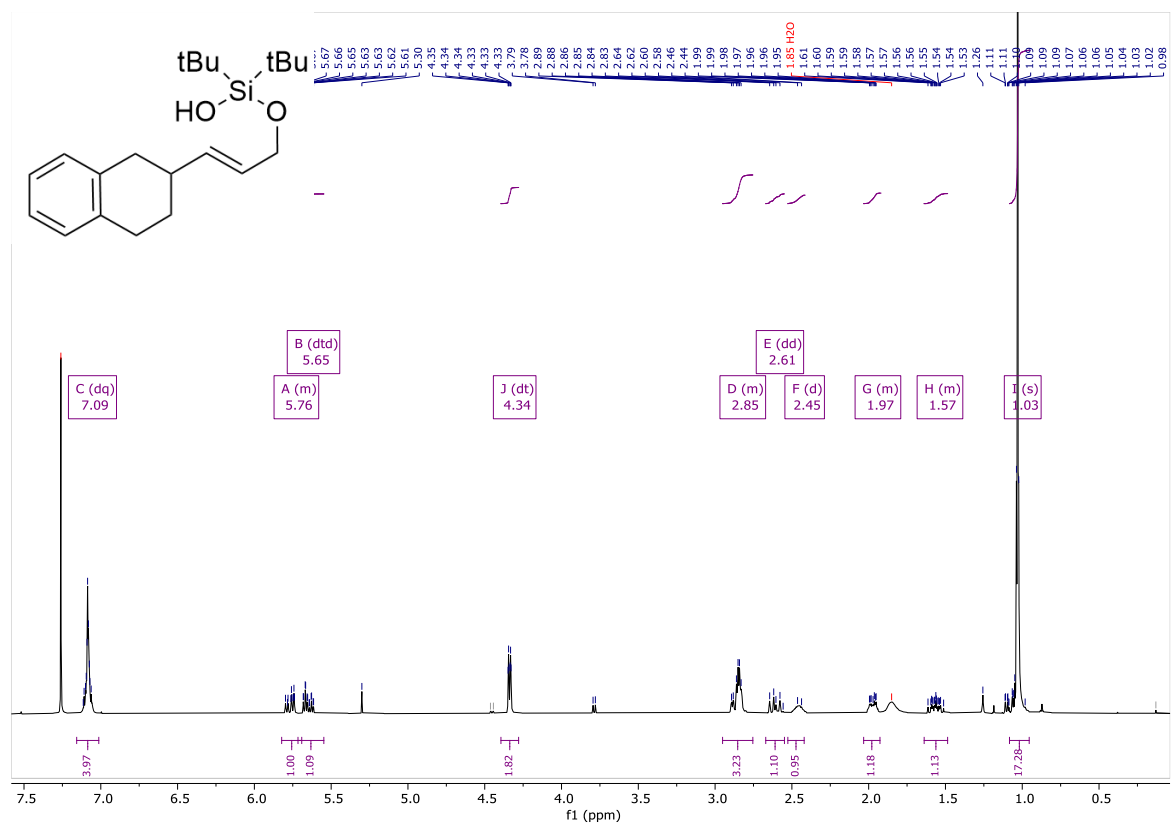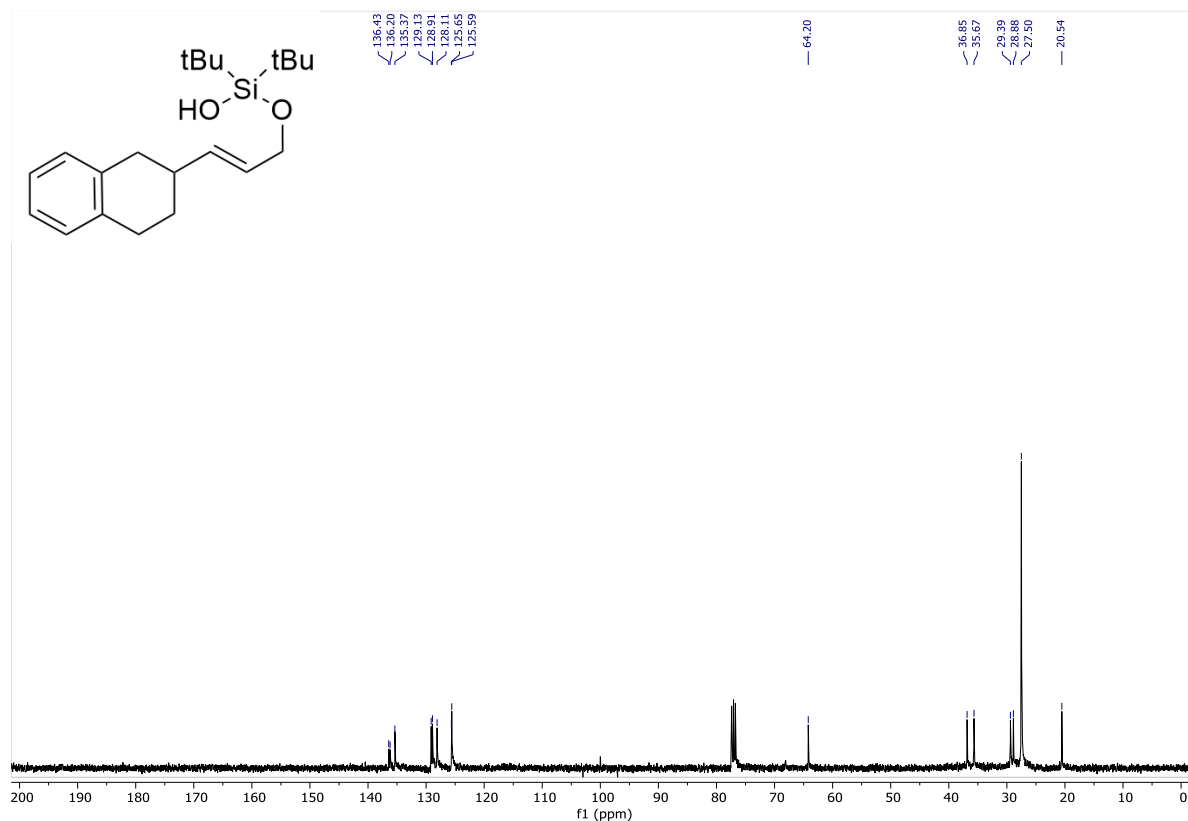

Compound 25 ( $^1\text{H}$  NMR: 400 MHz,  $^{13}\text{C}\{^1\text{H}\}$  NMR: 100 MHz)

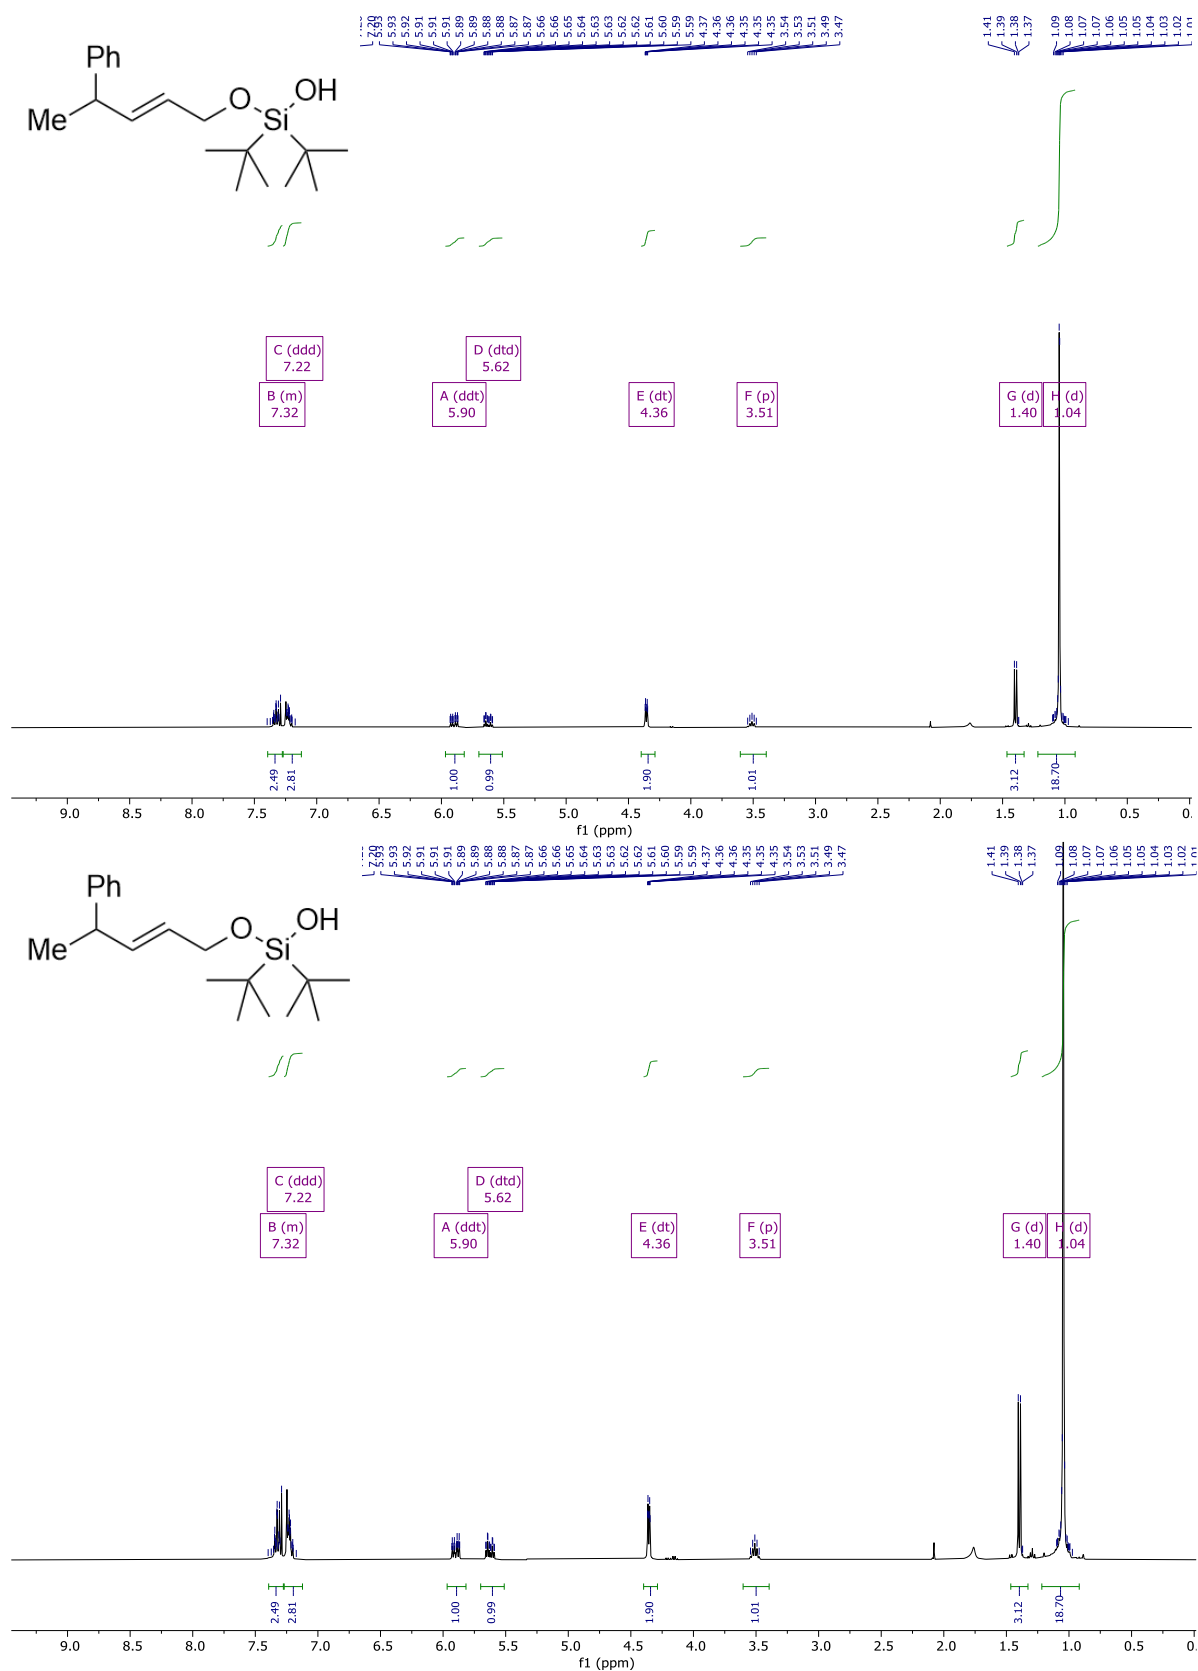



Compound 27 ( $^1\text{H}$  NMR: 400 MHz,  $^{13}\text{C}$ { $^1\text{H}$ } NMR: 100 MHz)

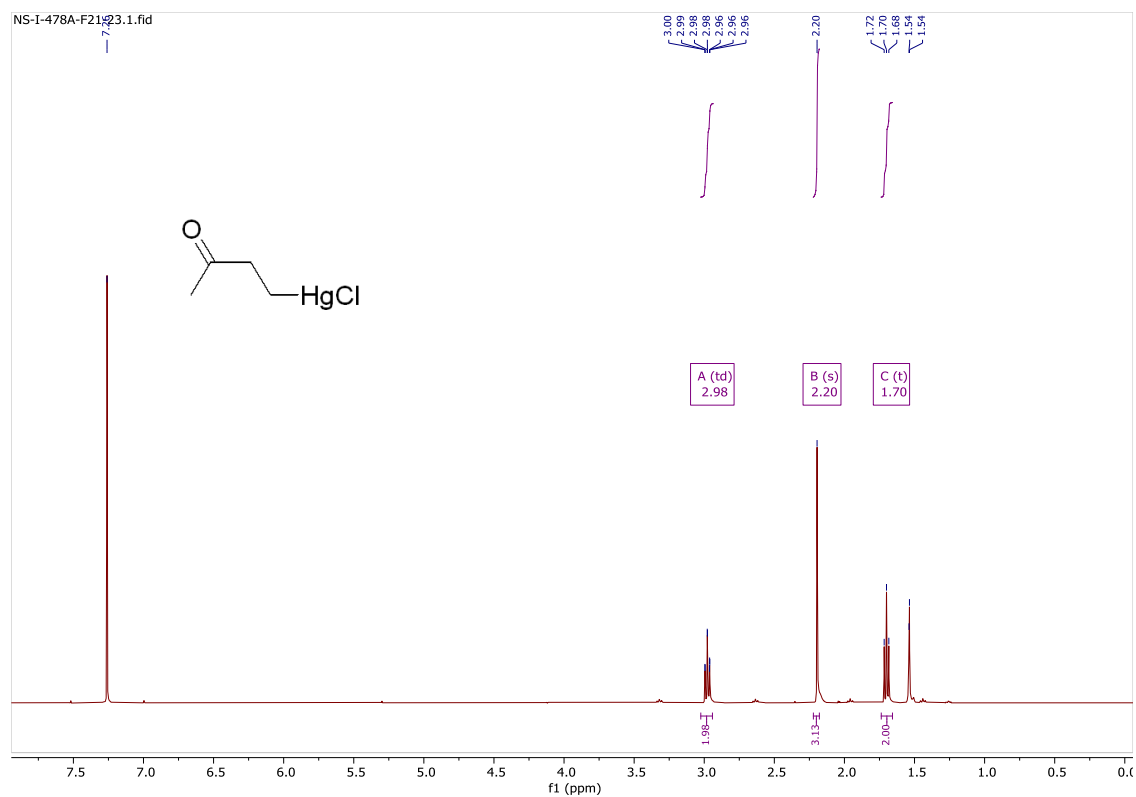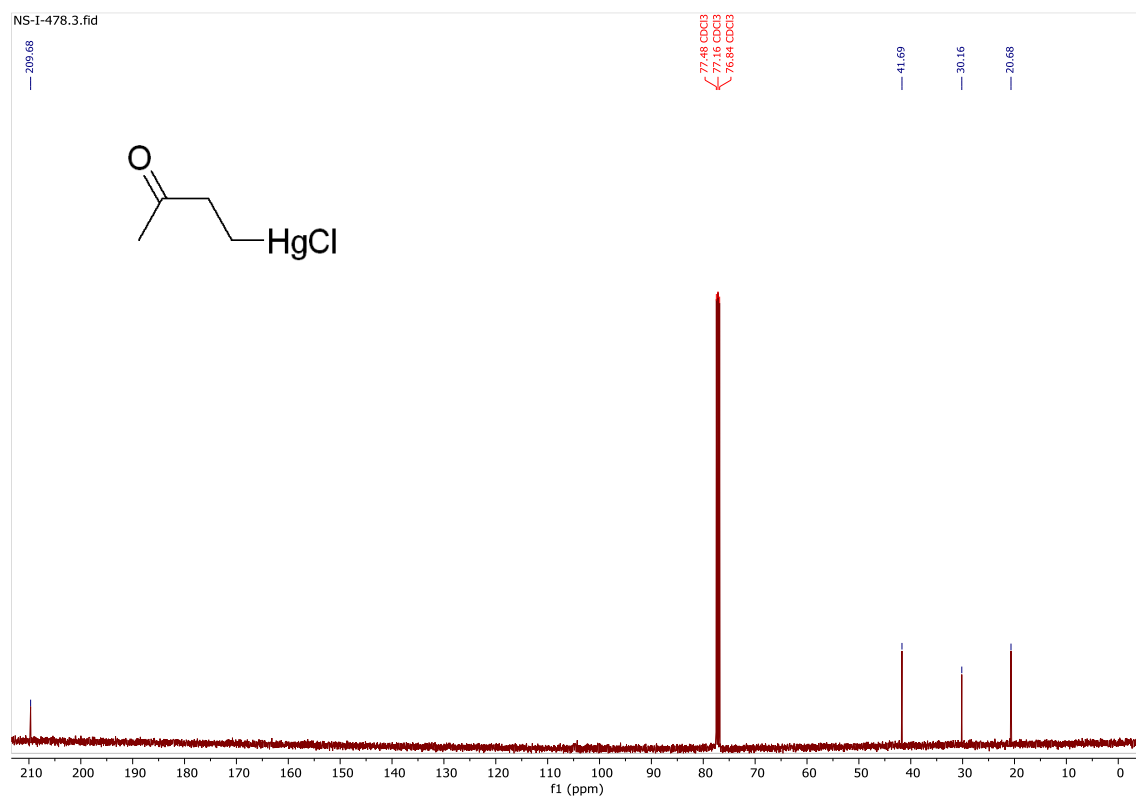

Compound 28 ( $^1\text{H}$  NMR: 400 MHz,  $^{13}\text{C}$ { $^1\text{H}$ } NMR: 100 MHz)

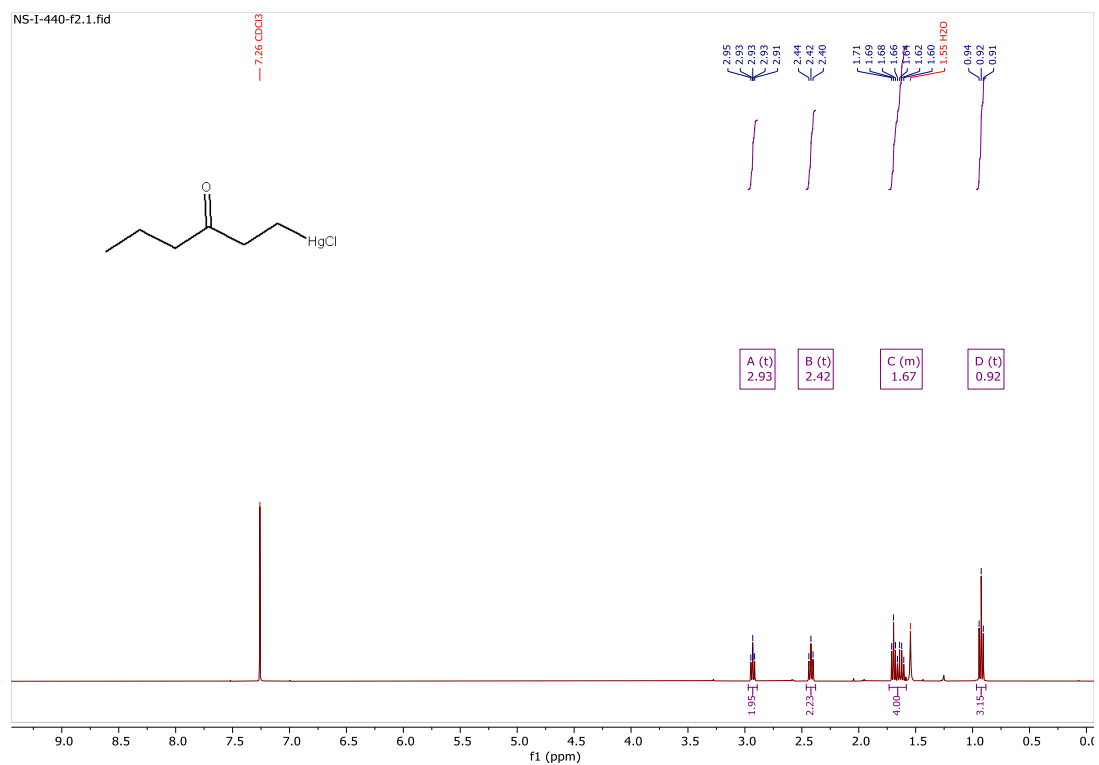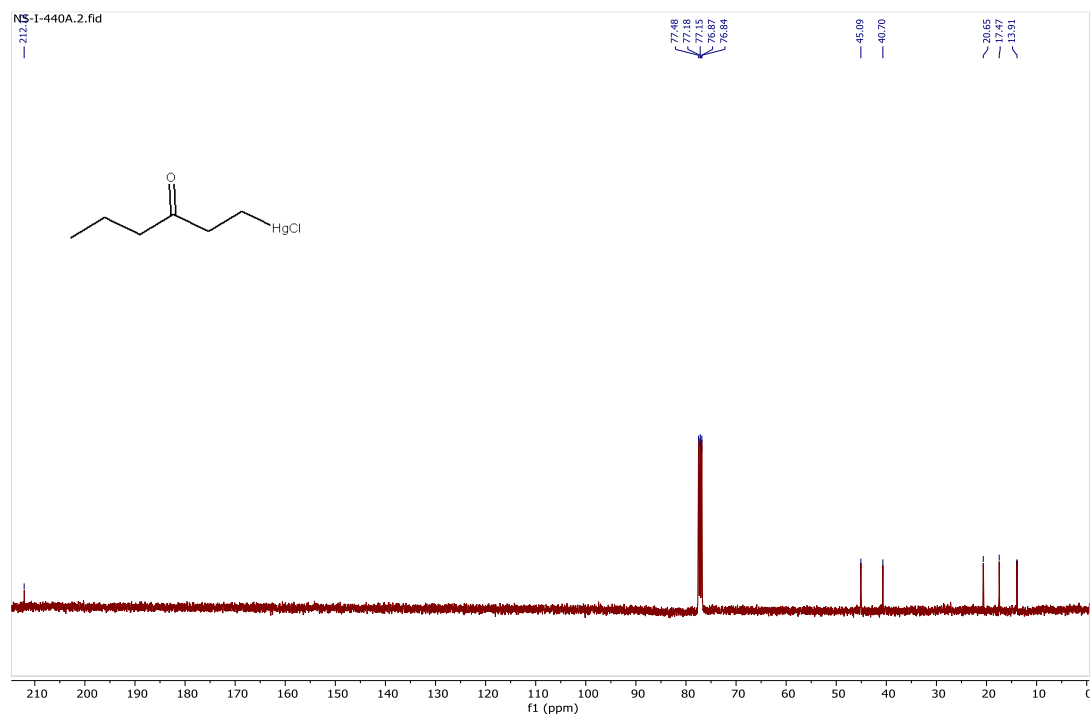

Compound 29 ( $^1\text{H}$  NMR: 400 MHz,  $^{13}\text{C}\{^1\text{H}\}$  NMR: 100 MHz)

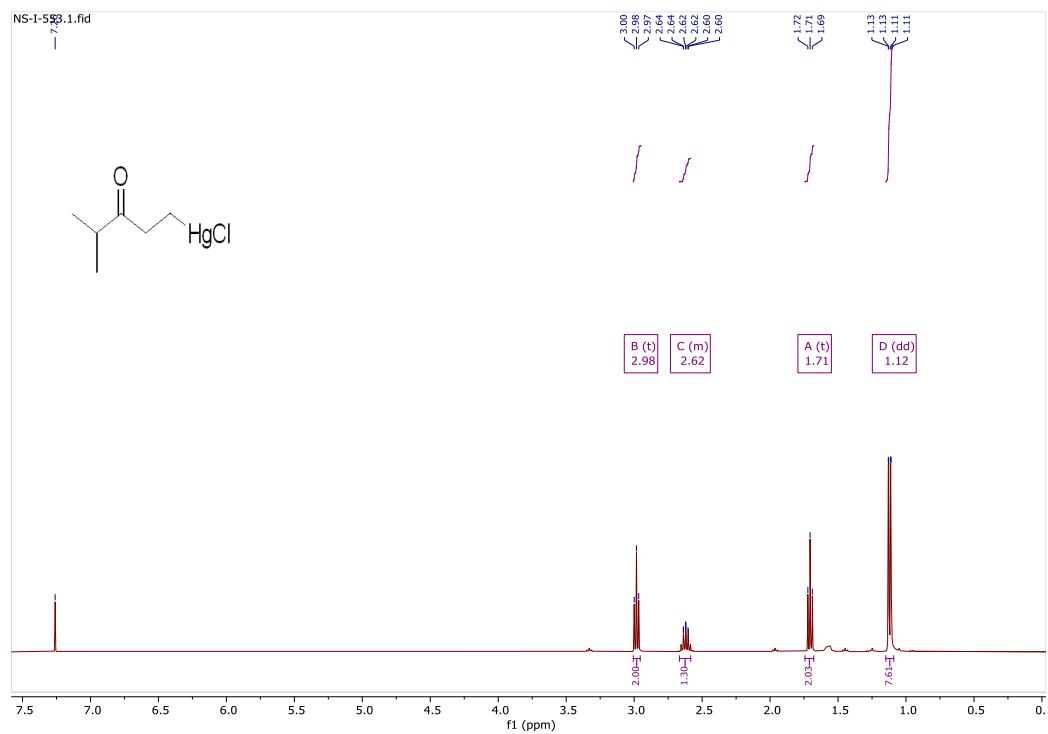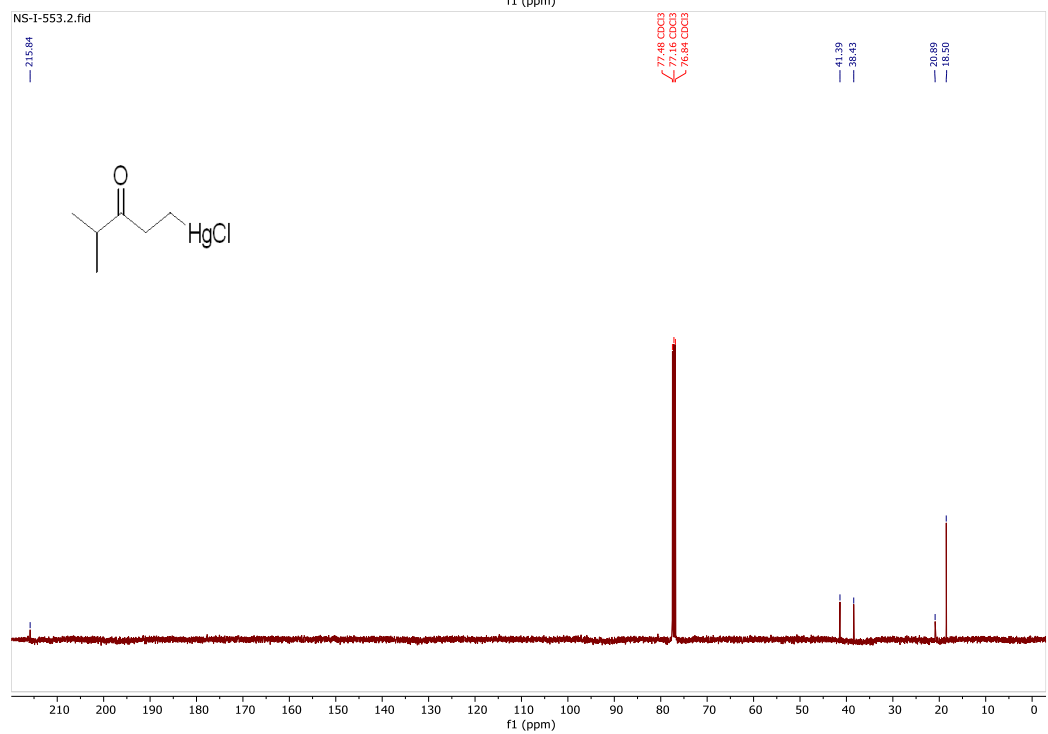

Compound 30 ( $^1\text{H}$  NMR: 400 MHz,  $^{13}\text{C}$  NMR: 100 MHz)

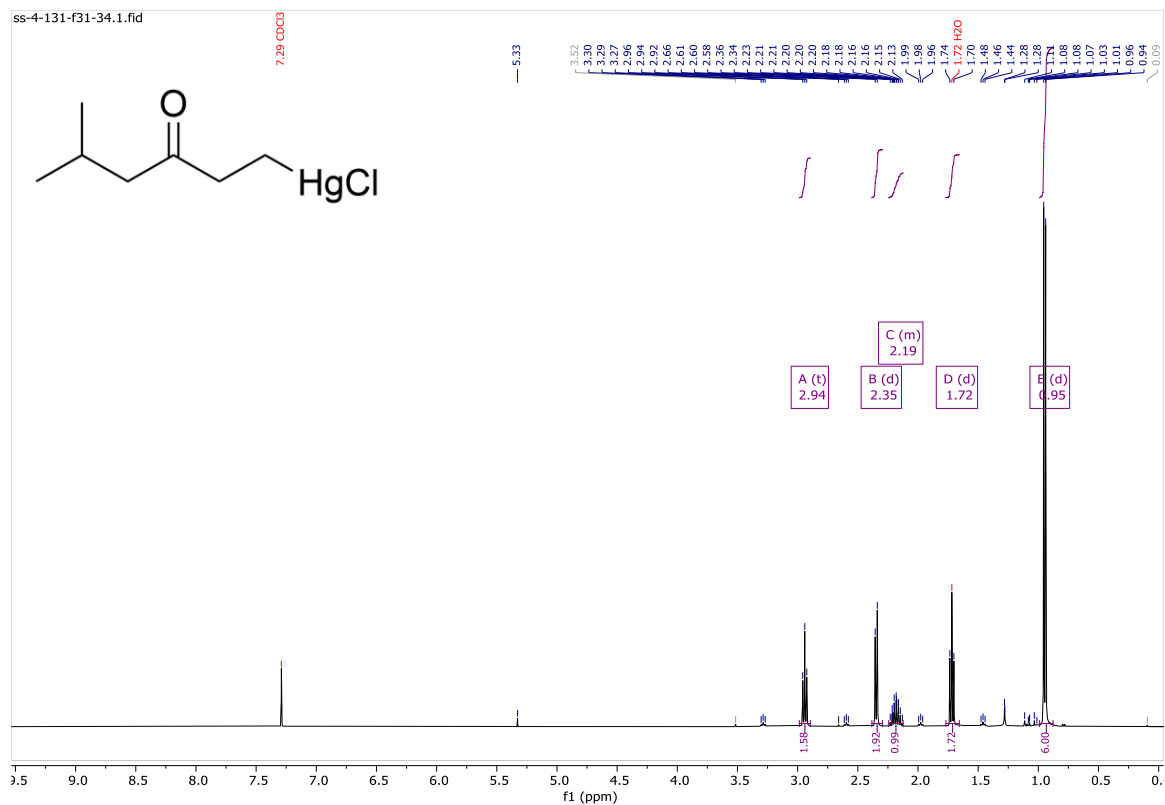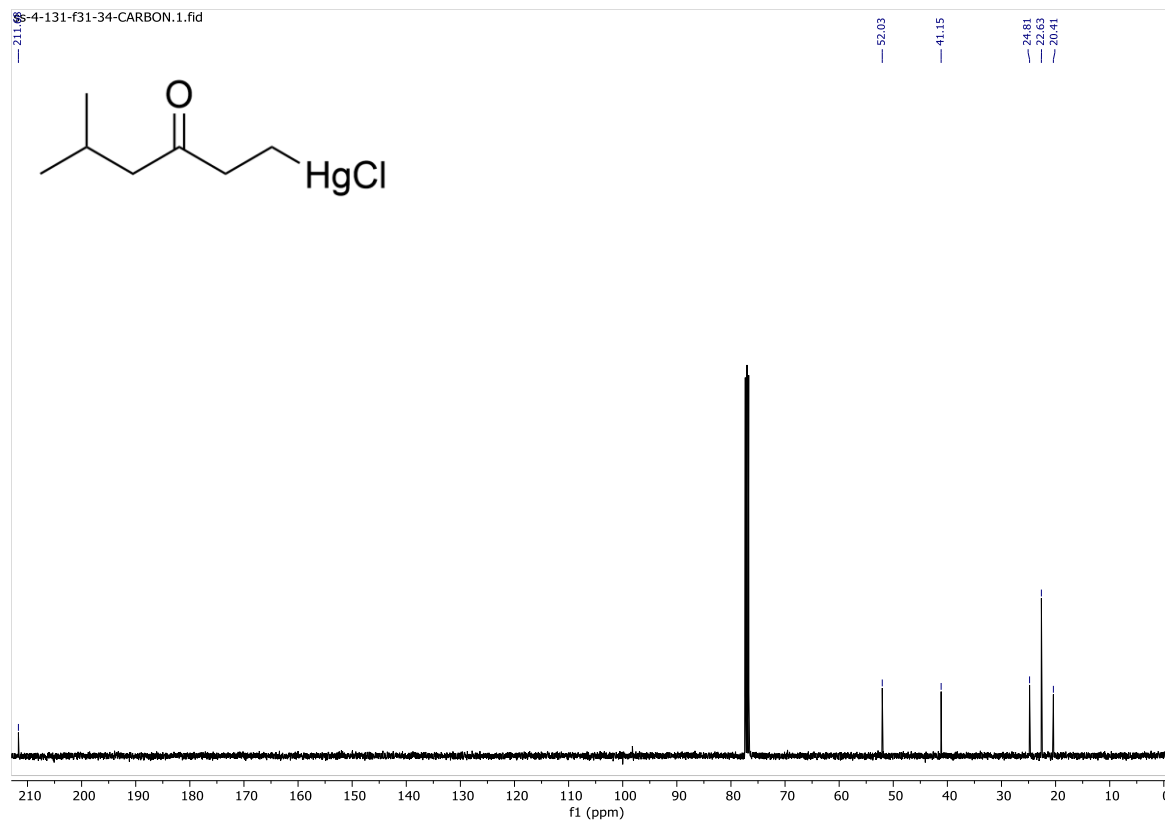



Compound 31 ( $^1\text{H}$  NMR: 400 MHz,  $^{13}\text{C}\{^1\text{H}\}$  NMR: 100 MHz)

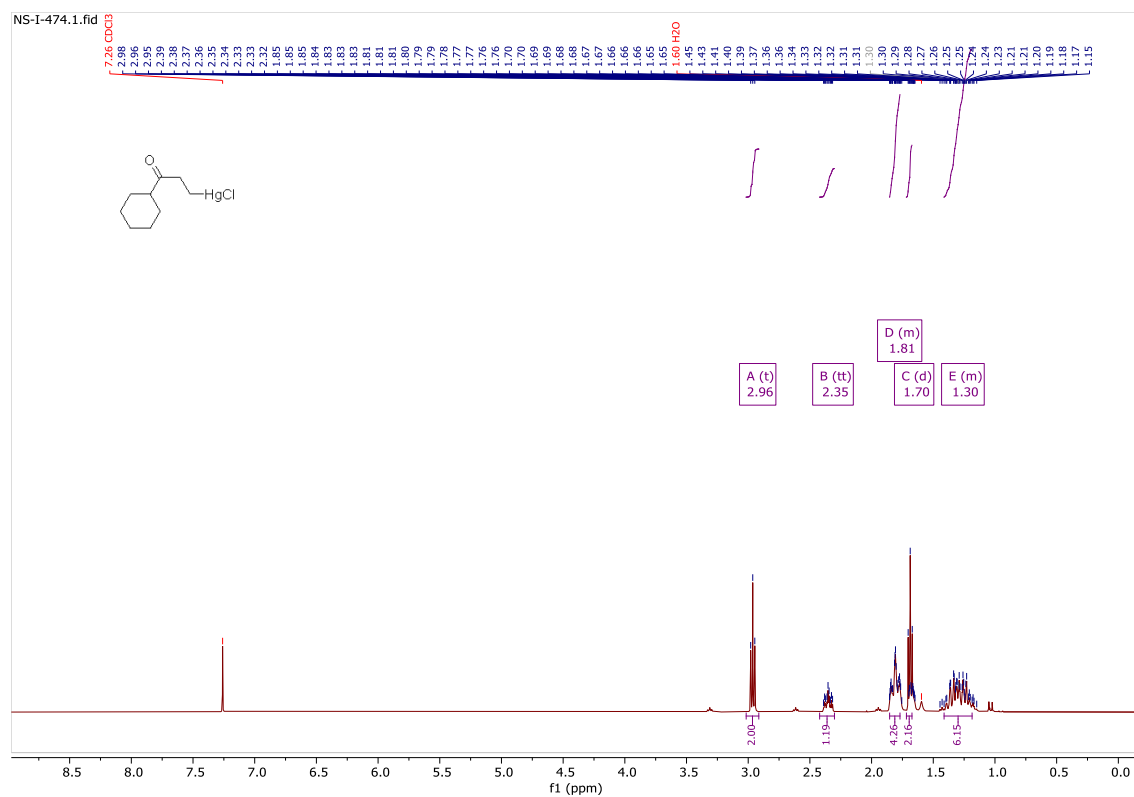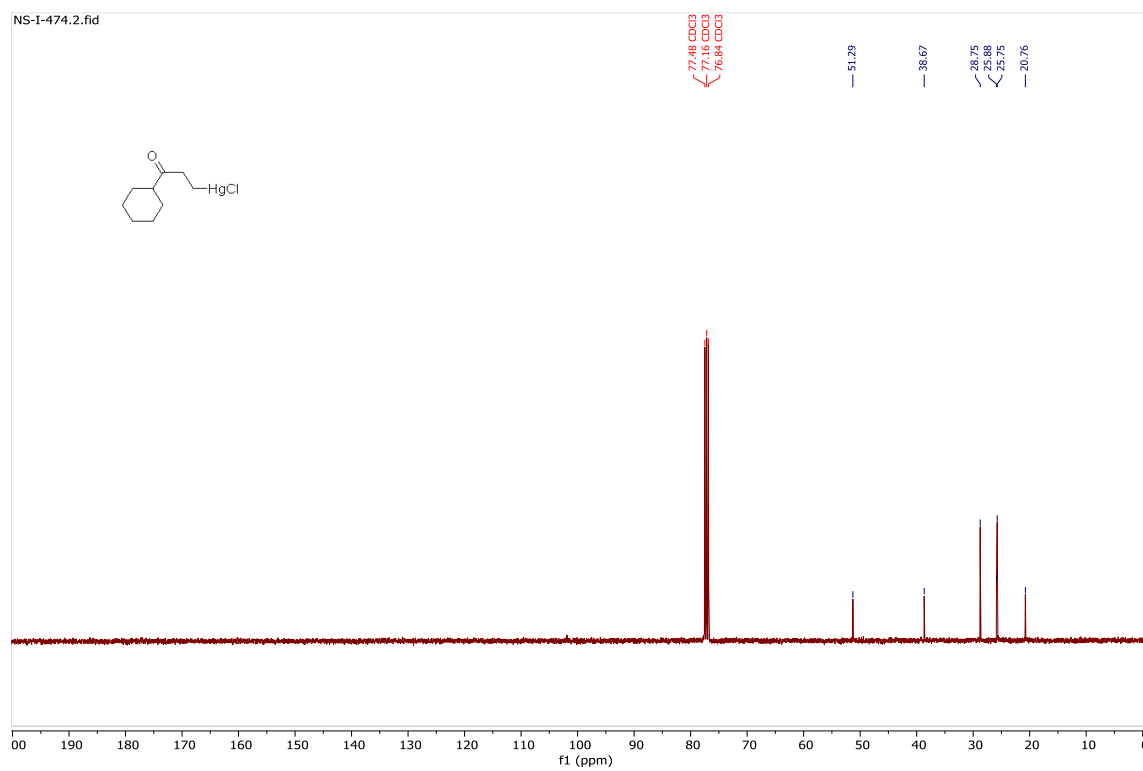



# Compound 33 (<sup>1</sup>H NMR: 400 MHz, <sup>13</sup>C{<sup>1</sup>H} NMR: 100 MHz)

RD-III-5 Pure.1.1.1r  
Pure

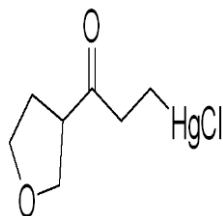

3.97  
3.95  
3.93  
3.93  
3.93  
3.90  
3.90  
3.89  
3.88  
3.86  
3.82  
3.82  
3.81  
3.80  
3.79  
3.79  
3.77  
3.75  
3.25  
3.23  
3.23  
3.21  
3.21  
3.19  
3.10  
3.08  
3.07  
3.03  
3.03  
3.00  
2.98  
2.97  
2.95  
2.15  
2.13  
2.11  
2.10  
1.76  
1.74  
1.73

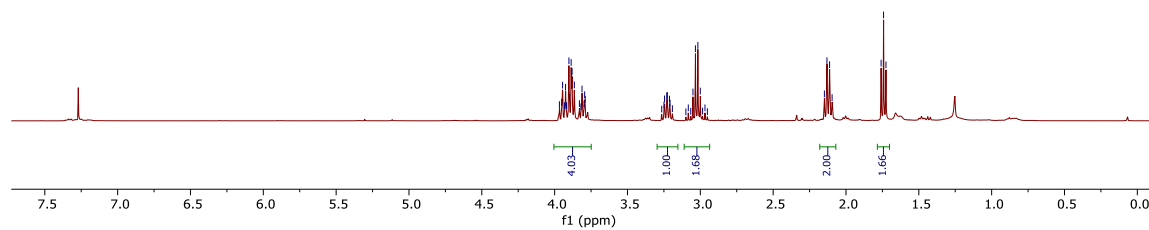

RD-III-5.1.1.1r

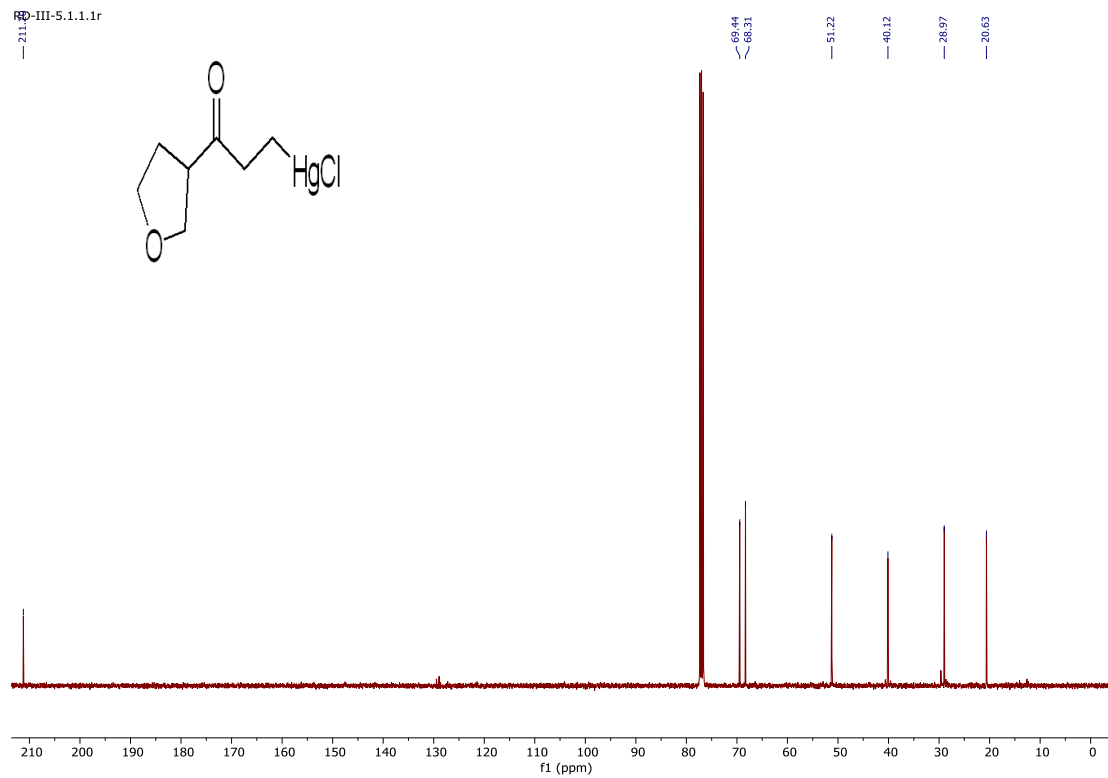

Compound 34 ( $^1\text{H}$  NMR: 400 MHz,  $^{13}\text{C}\{^1\text{H}\}$  NMR: 100 MHz)

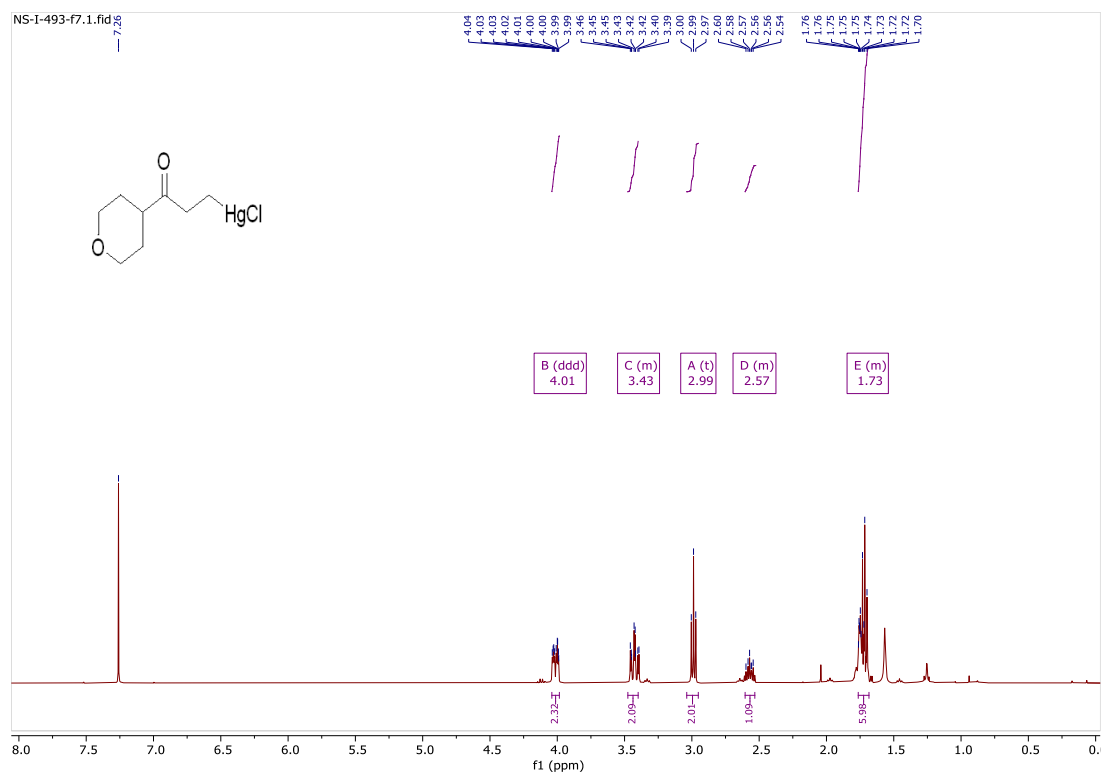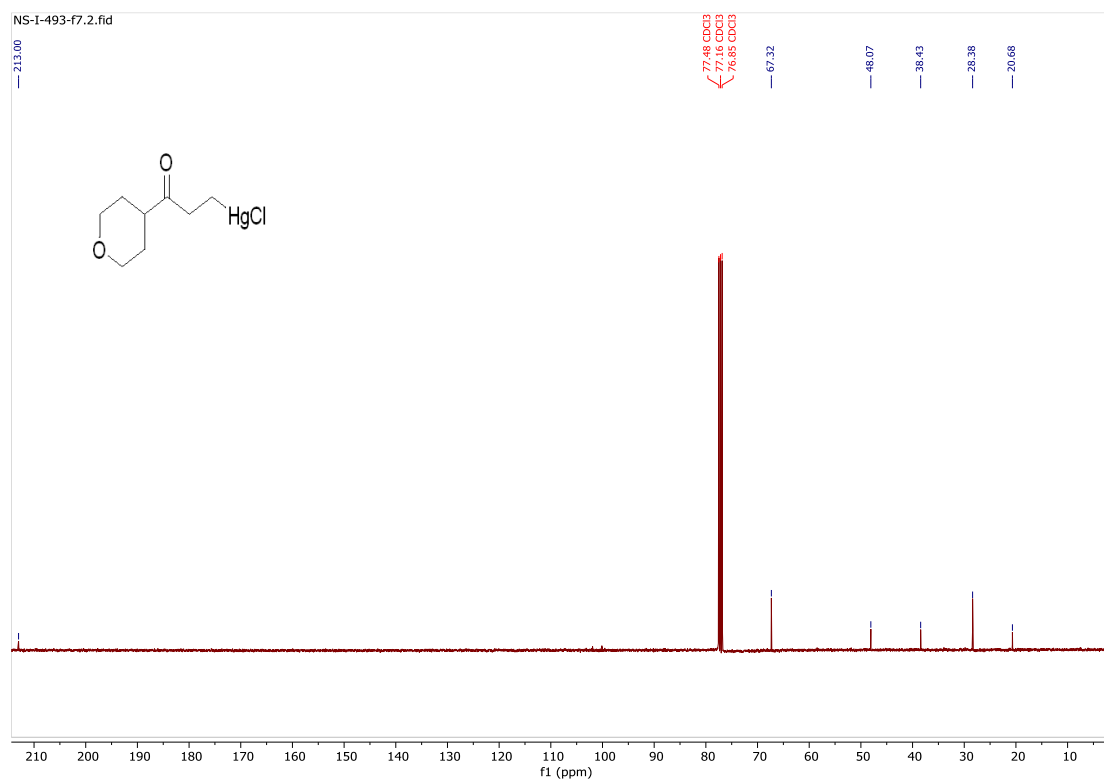

Compound 35 ( $^1\text{H}$  NMR: 400 MHz,  $^{13}\text{C}\{^1\text{H}\}$  NMR: 100 MHz)

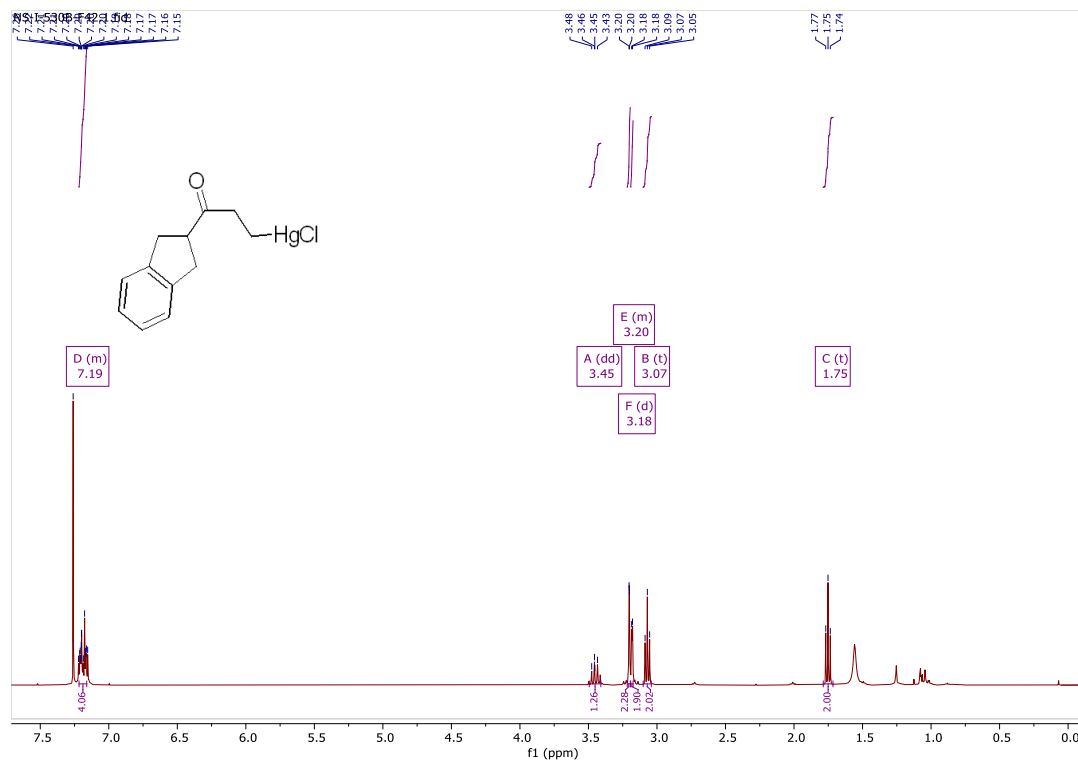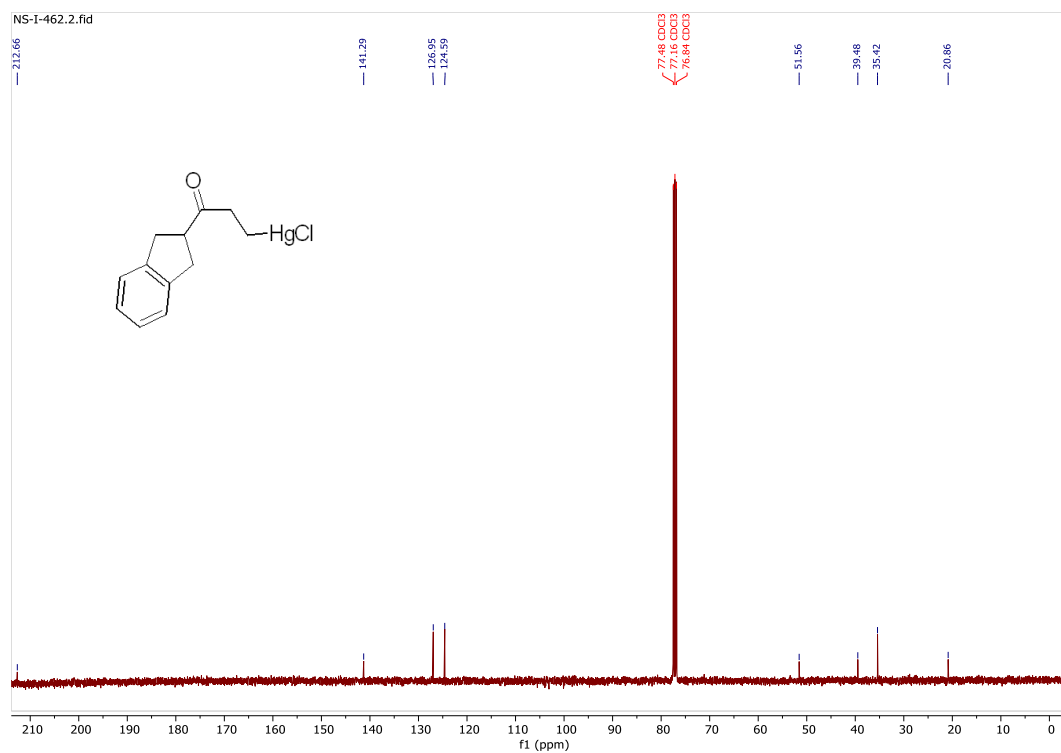

Compound 36 ( $^1\text{H}$  NMR: 400 MHz,  $^{13}\text{C}\{^1\text{H}\}$  NMR: 100 MHz)

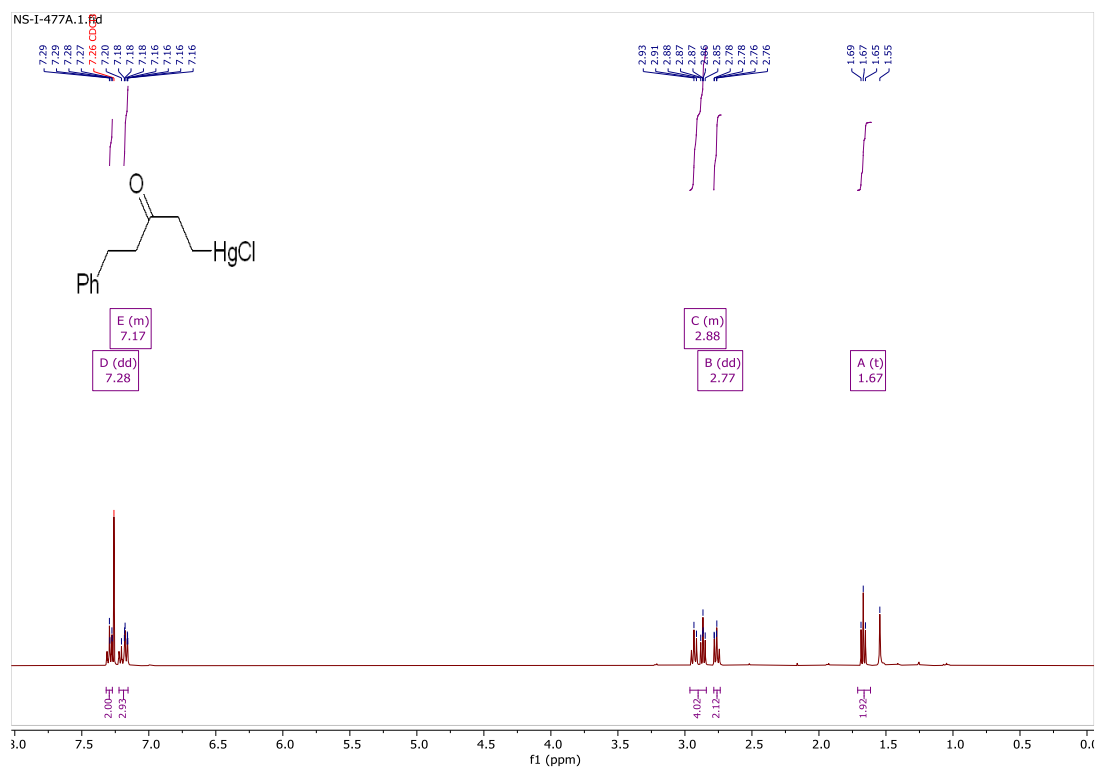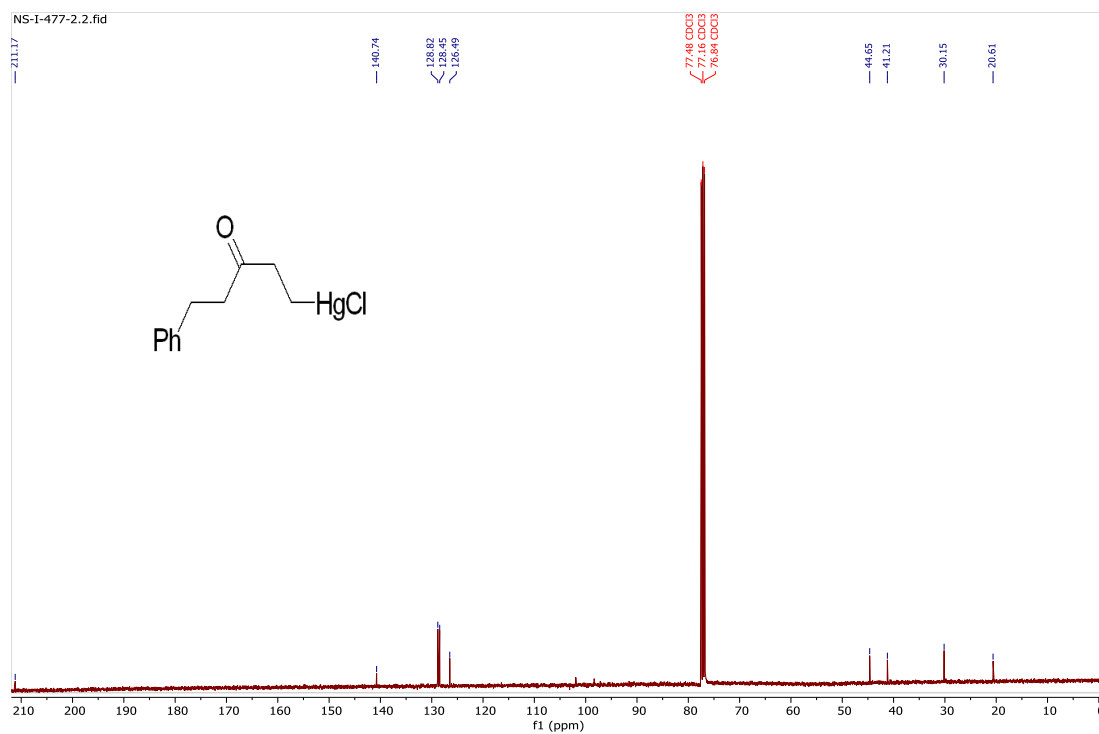

Compound 37 ( $^1\text{H}$  NMR: 600 MHz,  $^{13}\text{C}\{^1\text{H}\}$  NMR: 150 MHz)

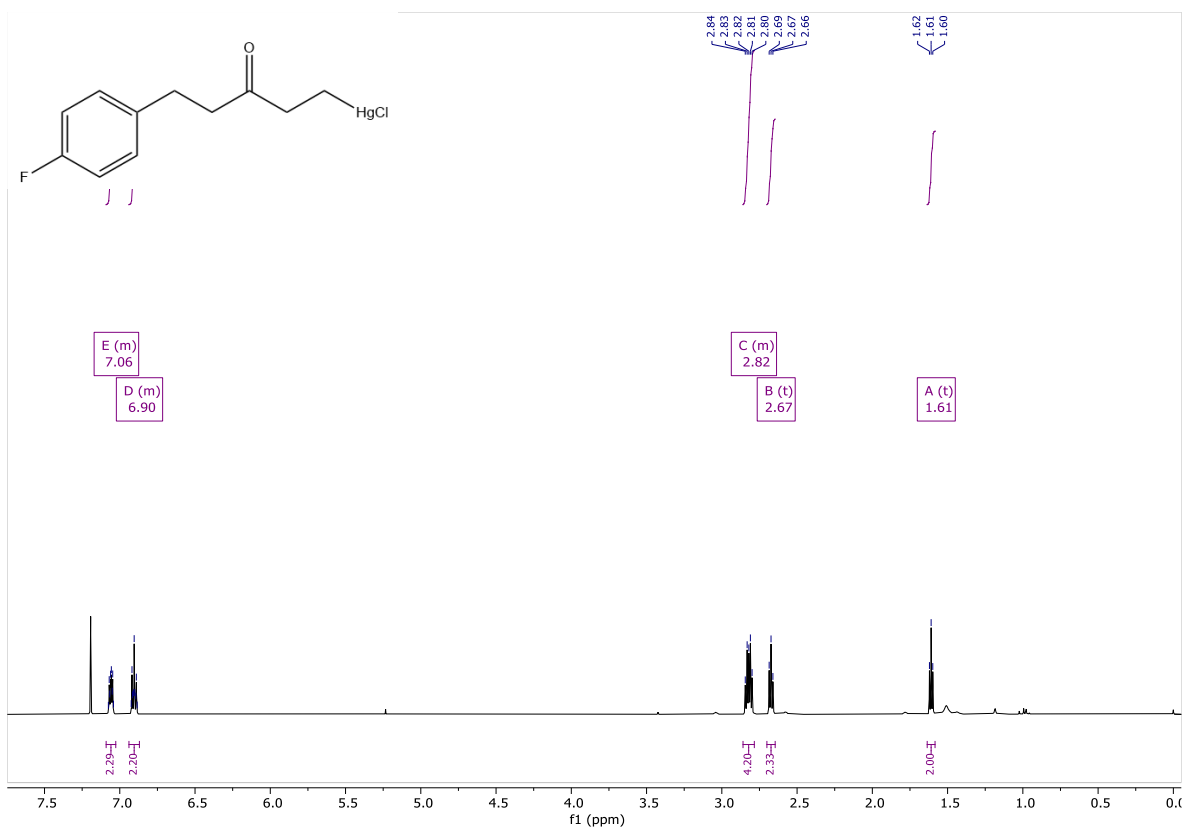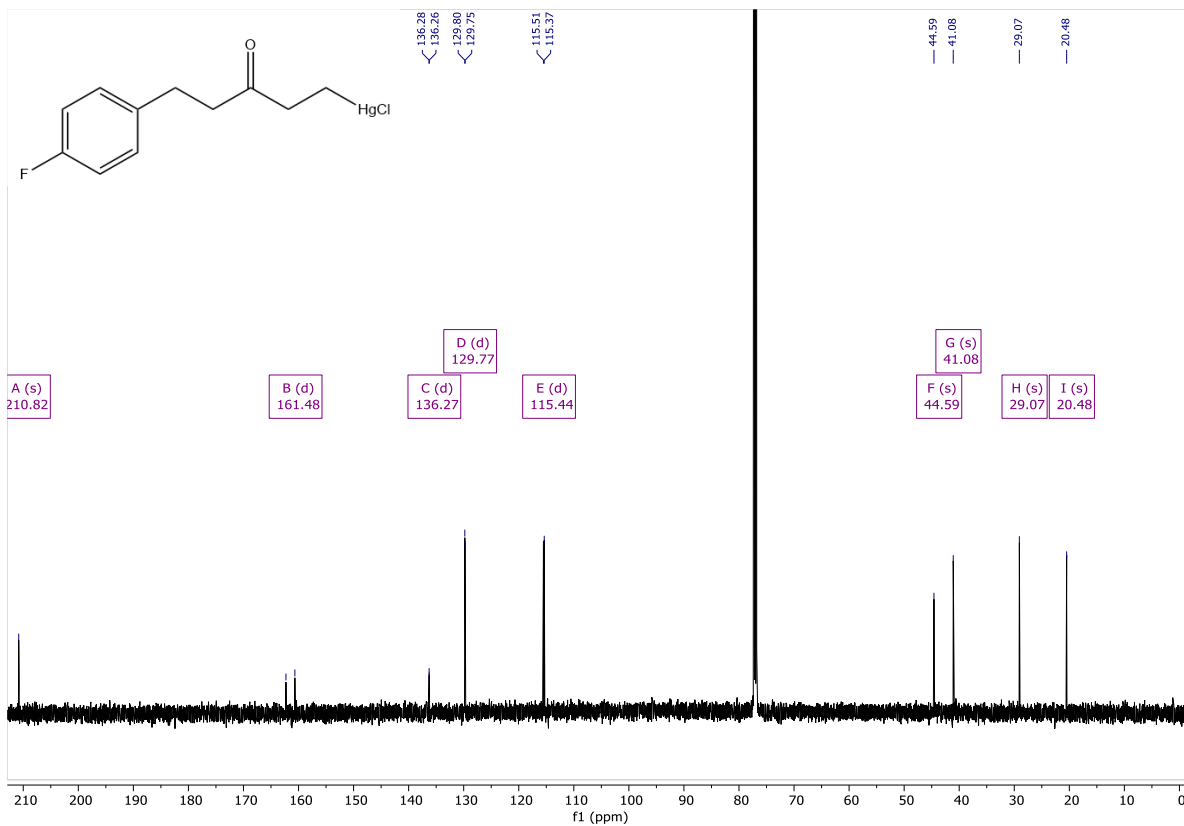

Compound 38 ( $^1\text{H}$  NMR: 400 MHz,  $^{13}\text{C}$ { $^1\text{H}$ } NMR: 100 MHz)

RD-III-1 Spt

7.72  
7.71  
7.12  
7.10

2.93  
2.86  
2.80  
2.87  
2.77  
2.75  
2.73

1.71  
1.68  
1.67

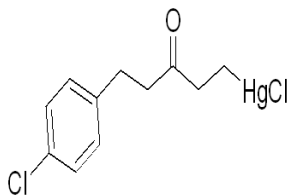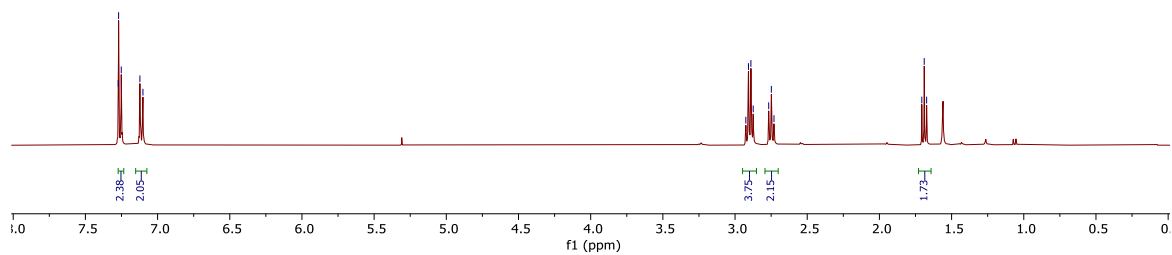

RD-III-1.3.1.1r

210

138.08  
132.07  
129.69  
128.71

44.24  
41.00  
29.13  
20.47

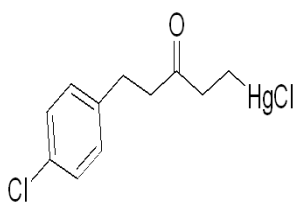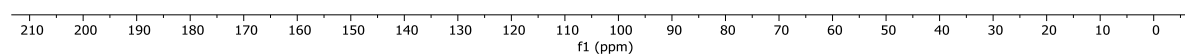



Compound 39 ( $^1\text{H}$  NMR: 400 MHz,  $^{13}\text{C}\{^1\text{H}\}$  NMR: 100 MHz)

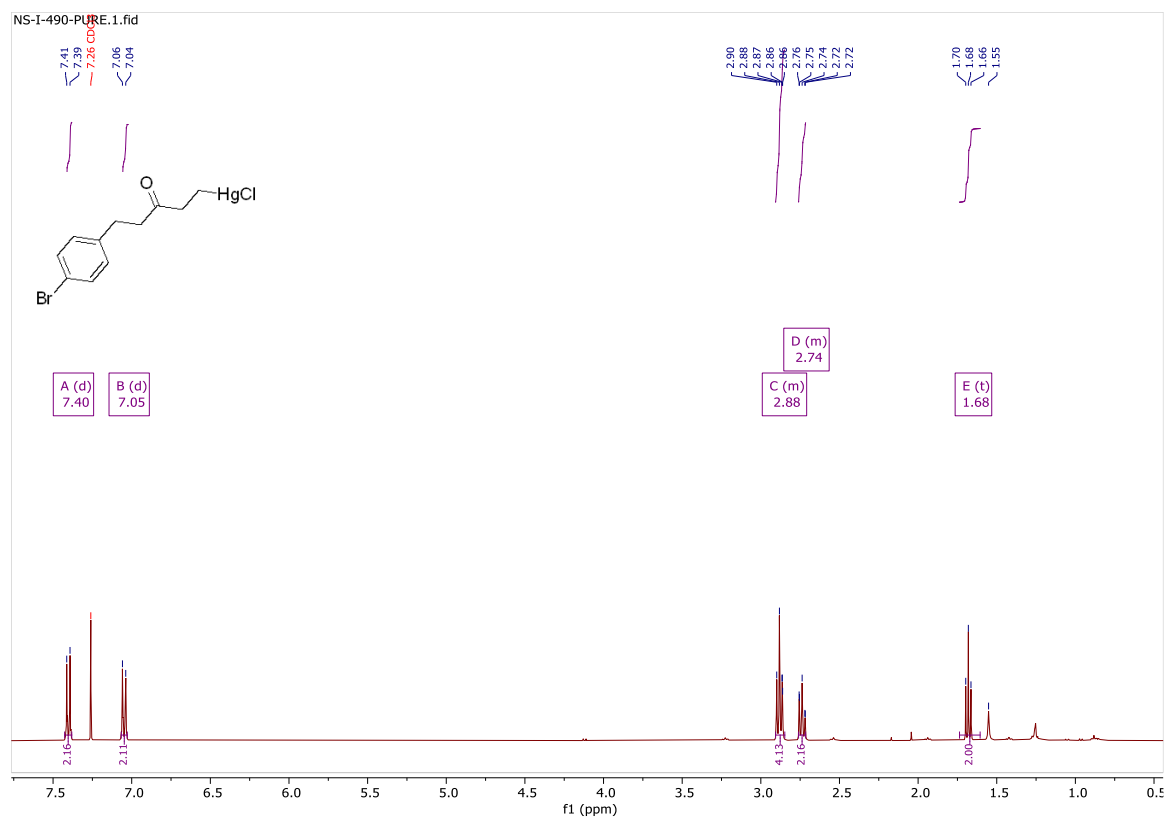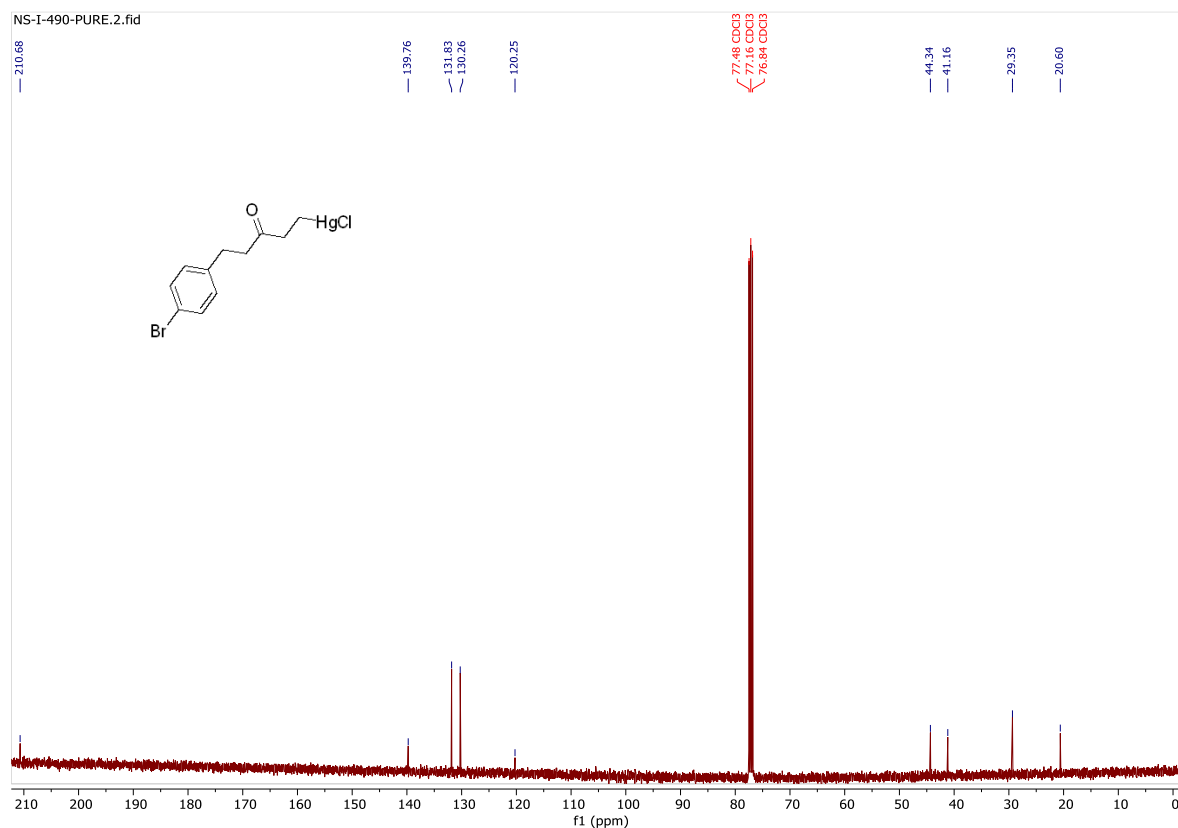

Compound 40 ( $^1\text{H}$  NMR: 600 MHz,  $^{13}\text{C}\{^1\text{H}\}$  NMR: 150 MHz)

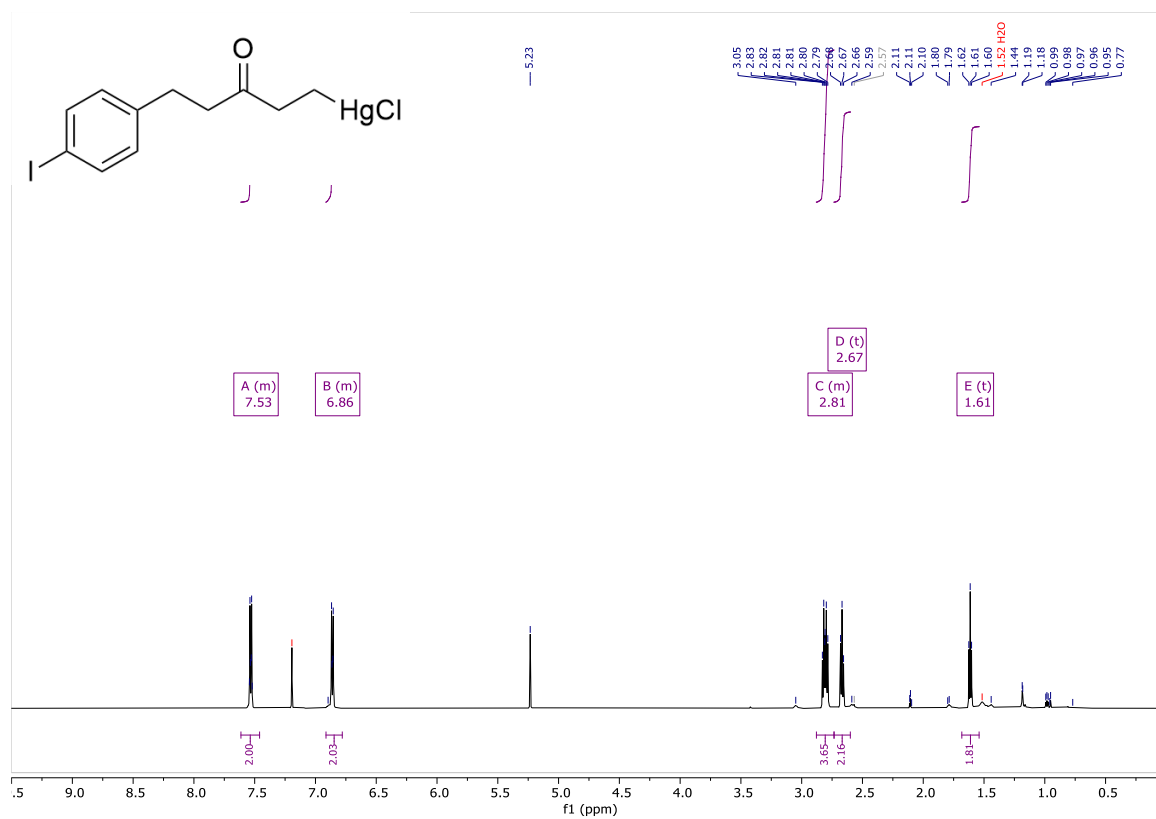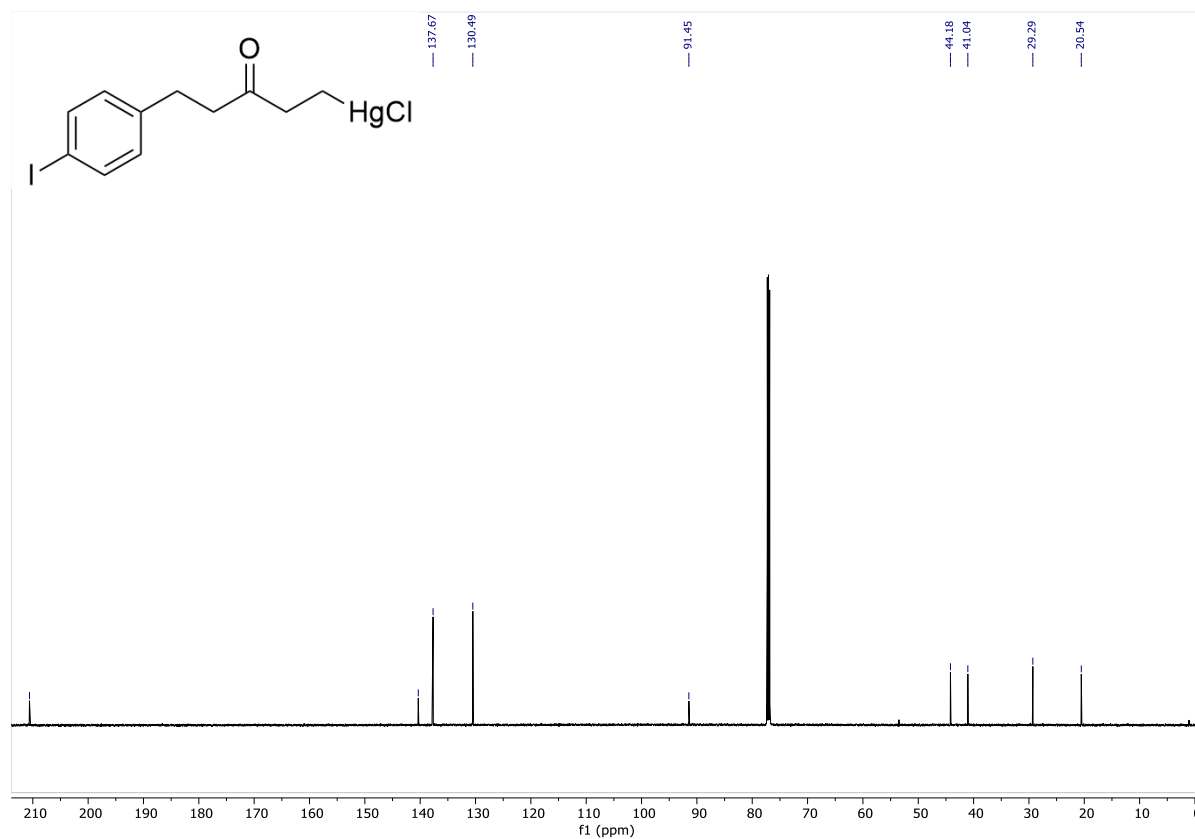

Compound 41 ( $^1\text{H}$  NMR: 400 MHz,  $^{13}\text{C}\{^1\text{H}\}$  NMR: 100 MHz)

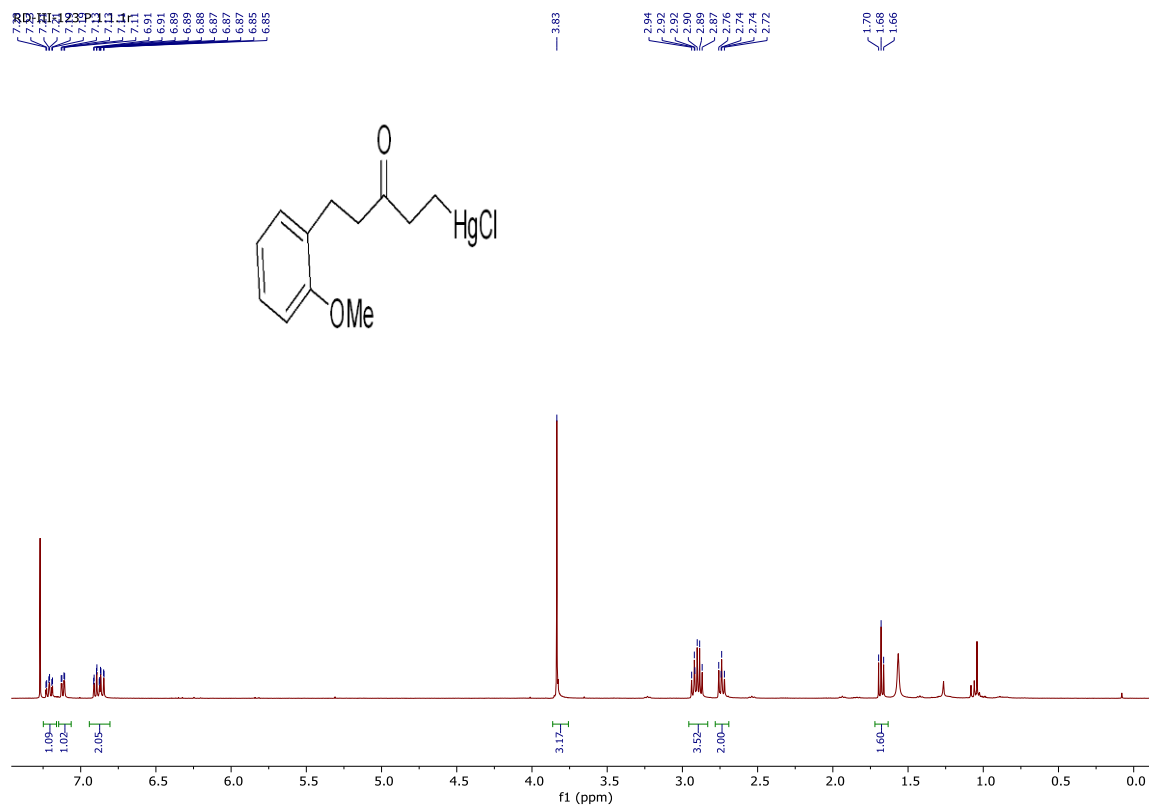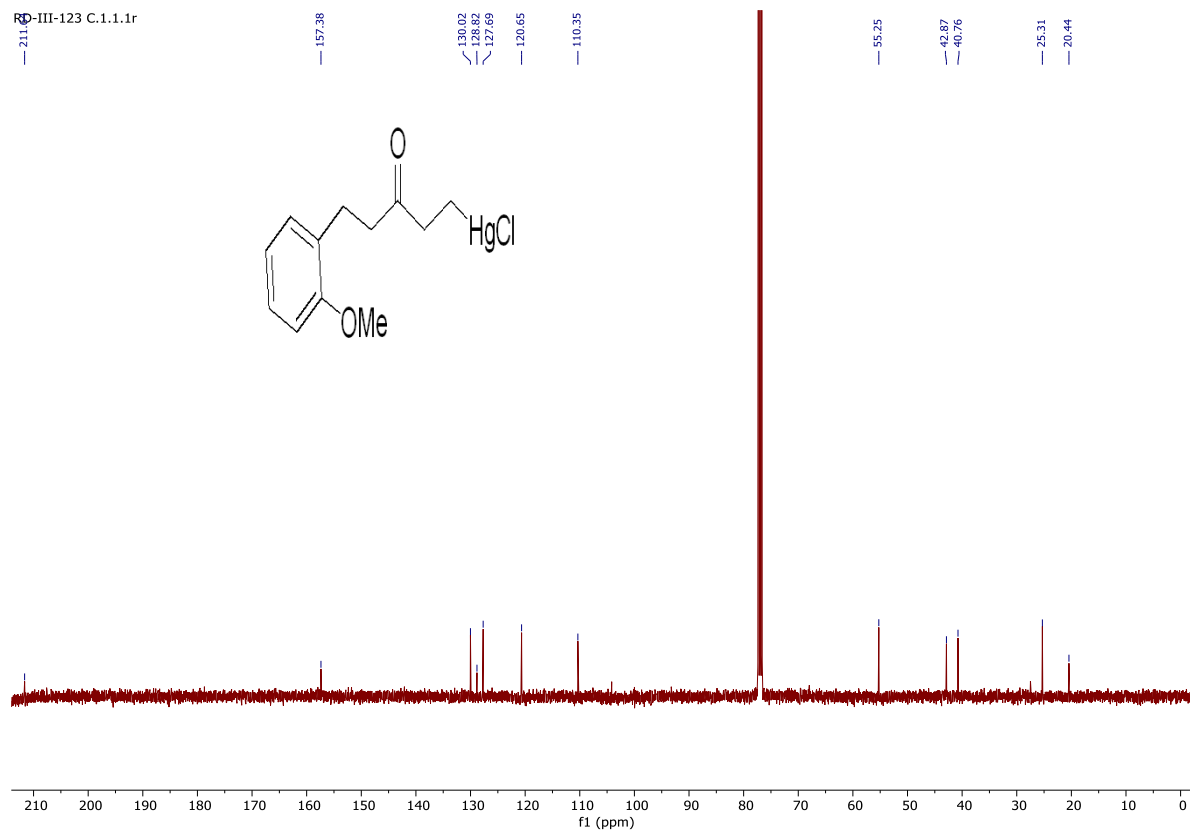

Compound 42 ( $^1\text{H}$  NMR: 400 MHz,  $^{13}\text{C}\{^1\text{H}\}$  NMR: 100 MHz)

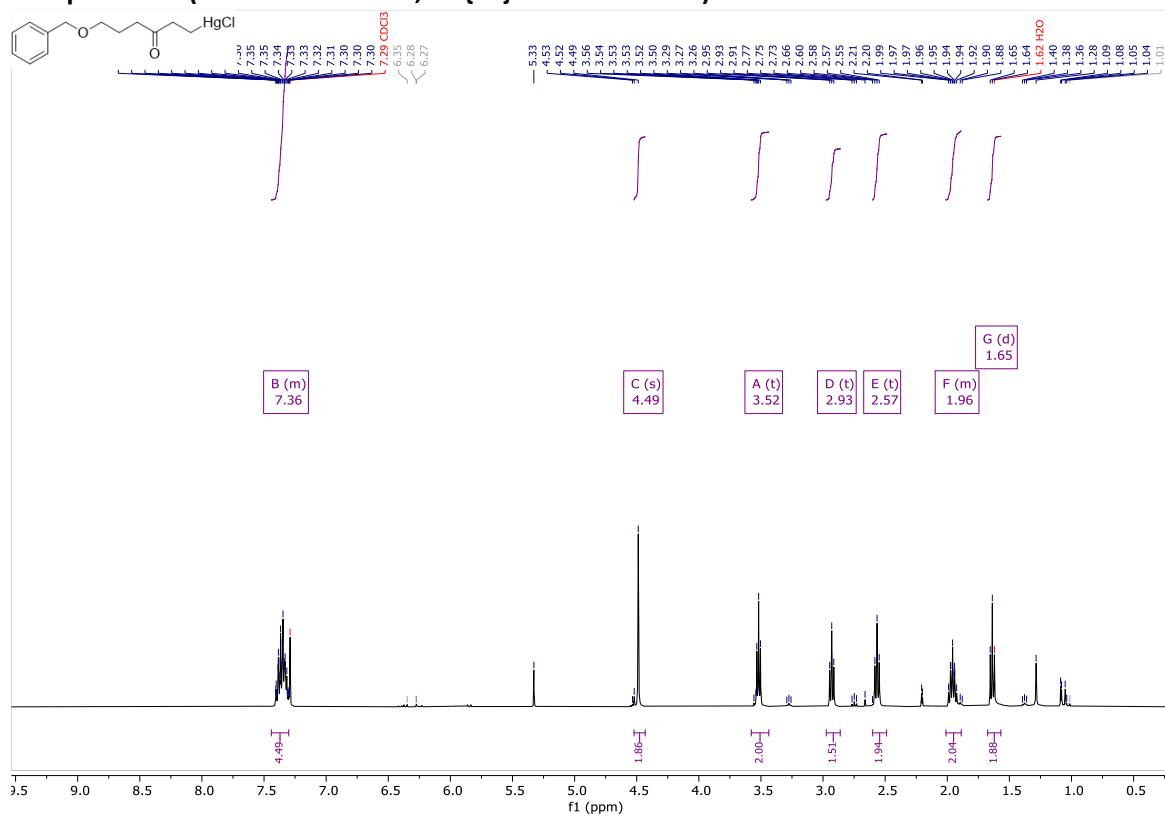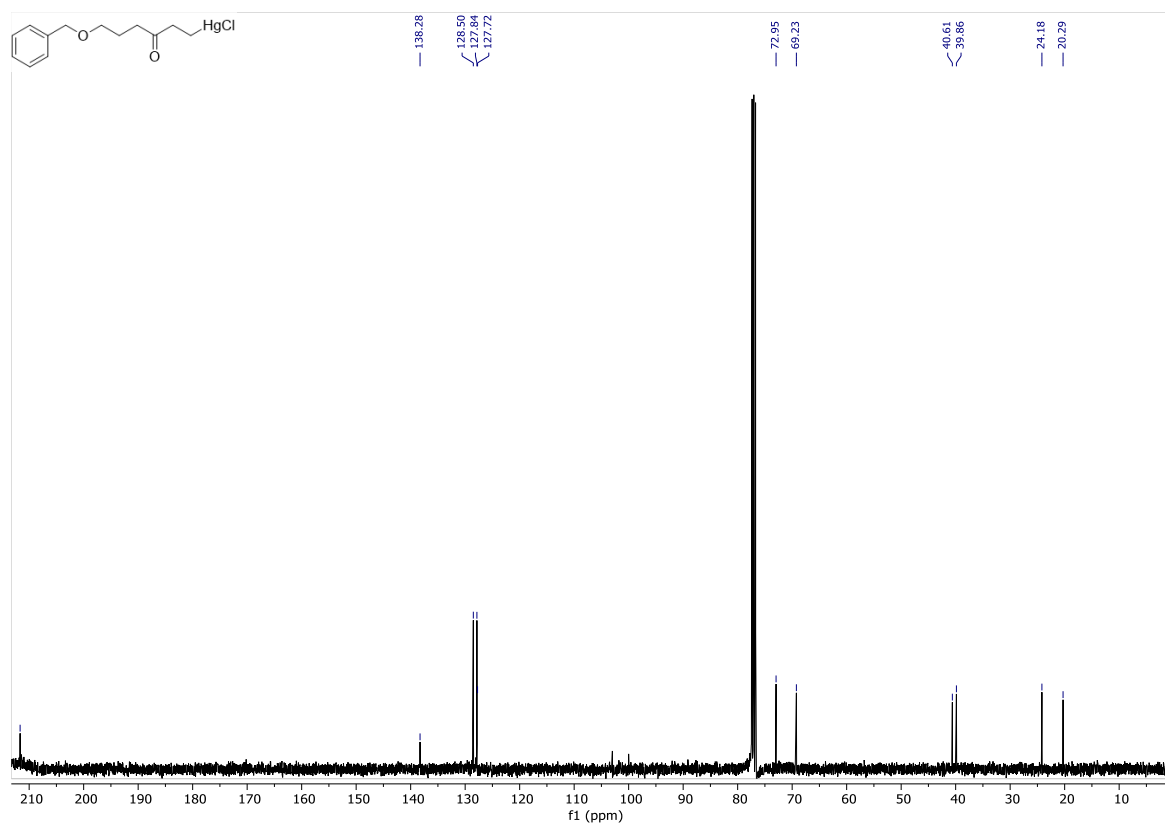

Compound 43 ( $^1\text{H}$  NMR: 600 MHz,  $^{13}\text{C}$ { $^1\text{H}$ } NMR: 150 MHz)

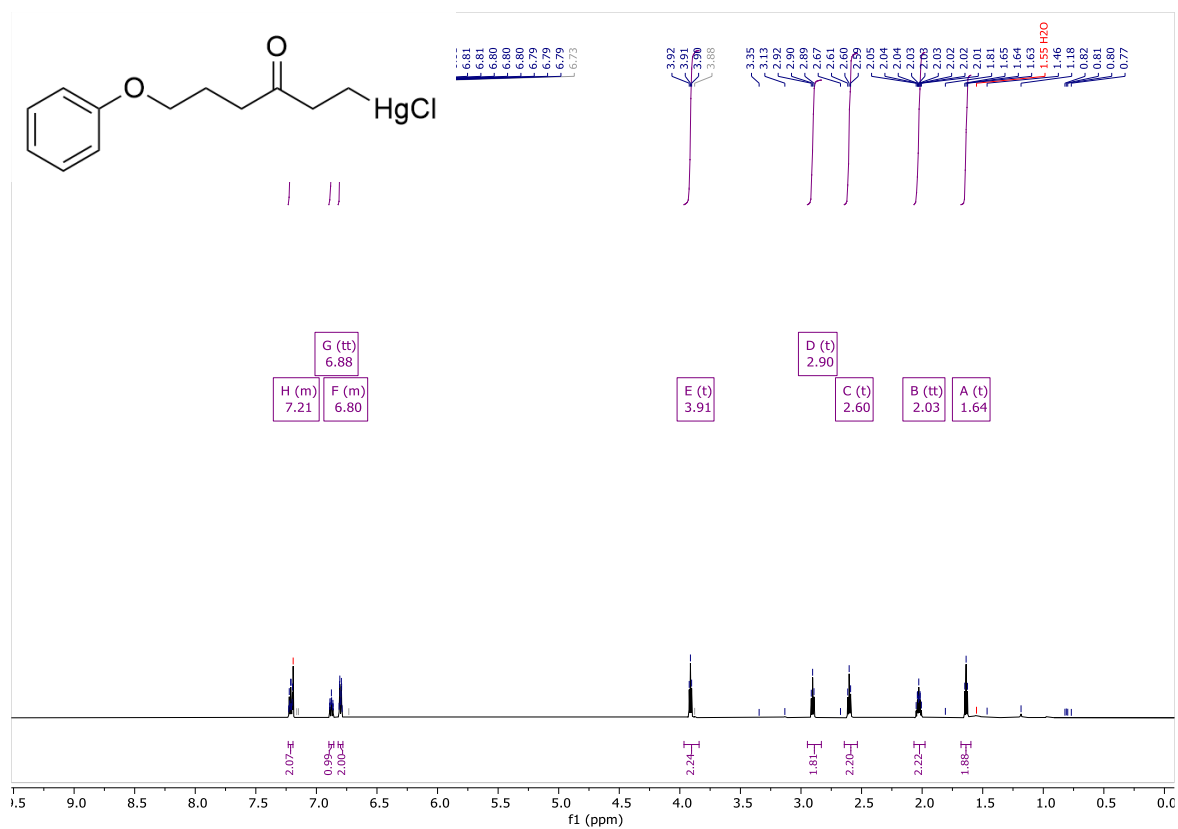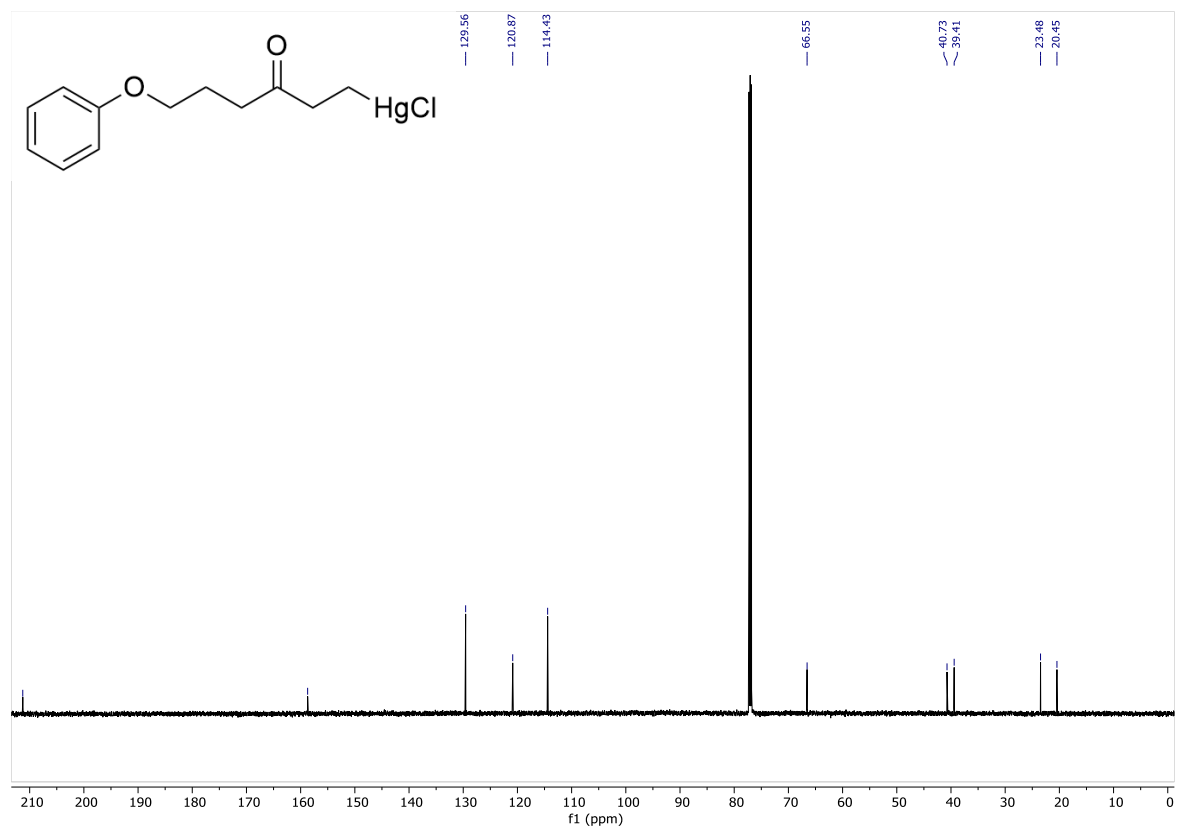

Compound 44 ( $^1\text{H}$  NMR: 600 MHz,  $^{13}\text{C}\{^1\text{H}\}$  NMR: 100 MHz)

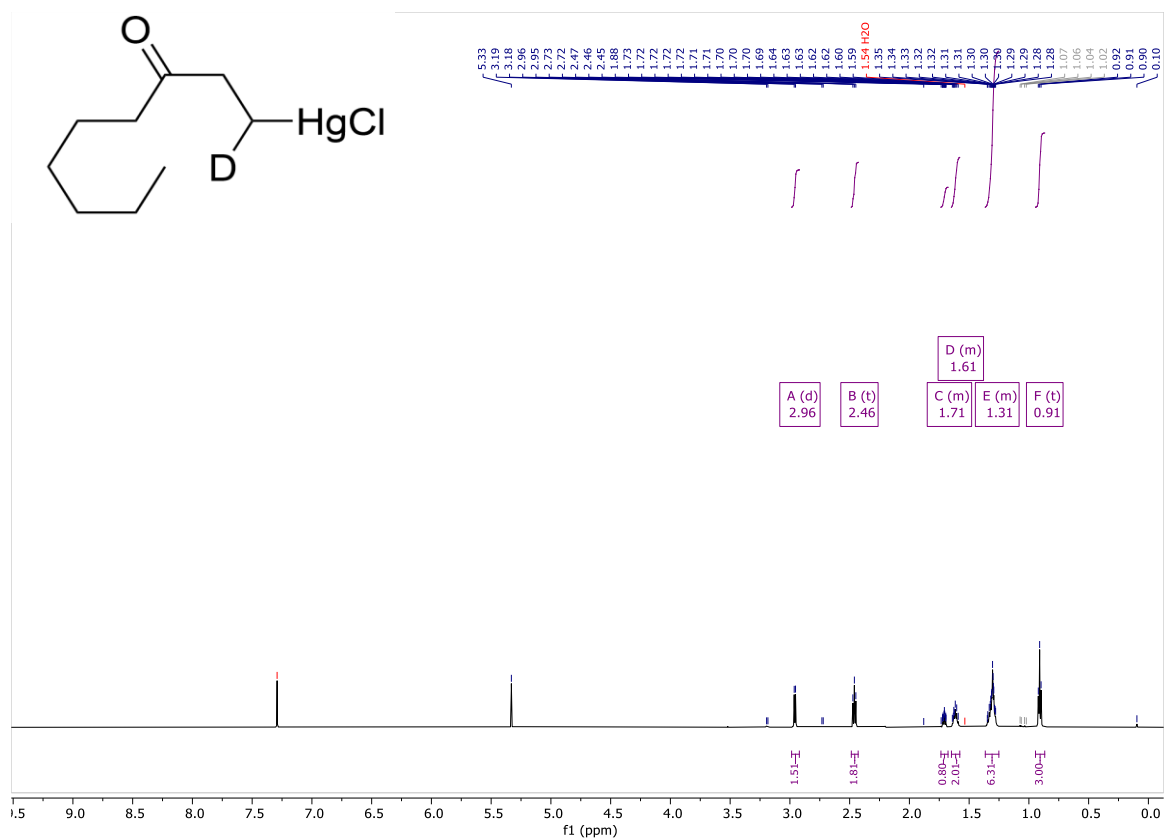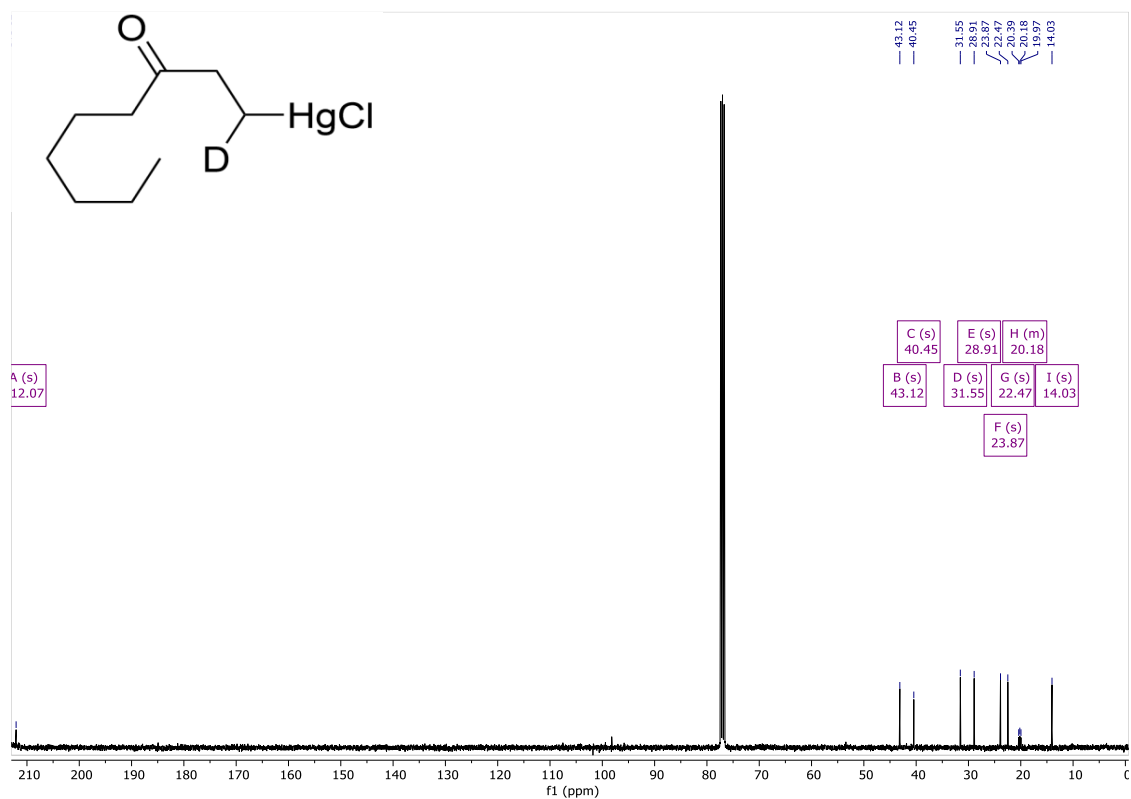

Compound 45 ( $^1\text{H}$  NMR: 400 MHz,  $^{13}\text{C}$ { $^1\text{H}$ } NMR: 100 MHz)

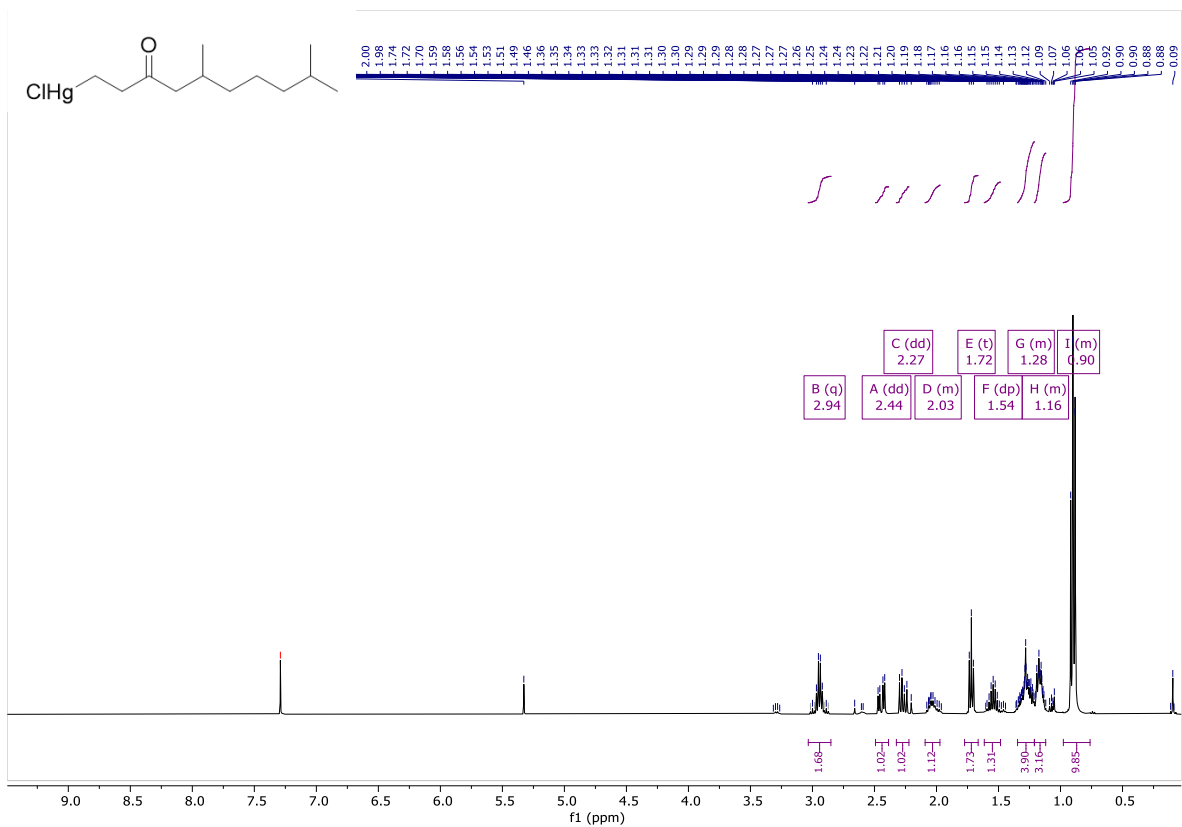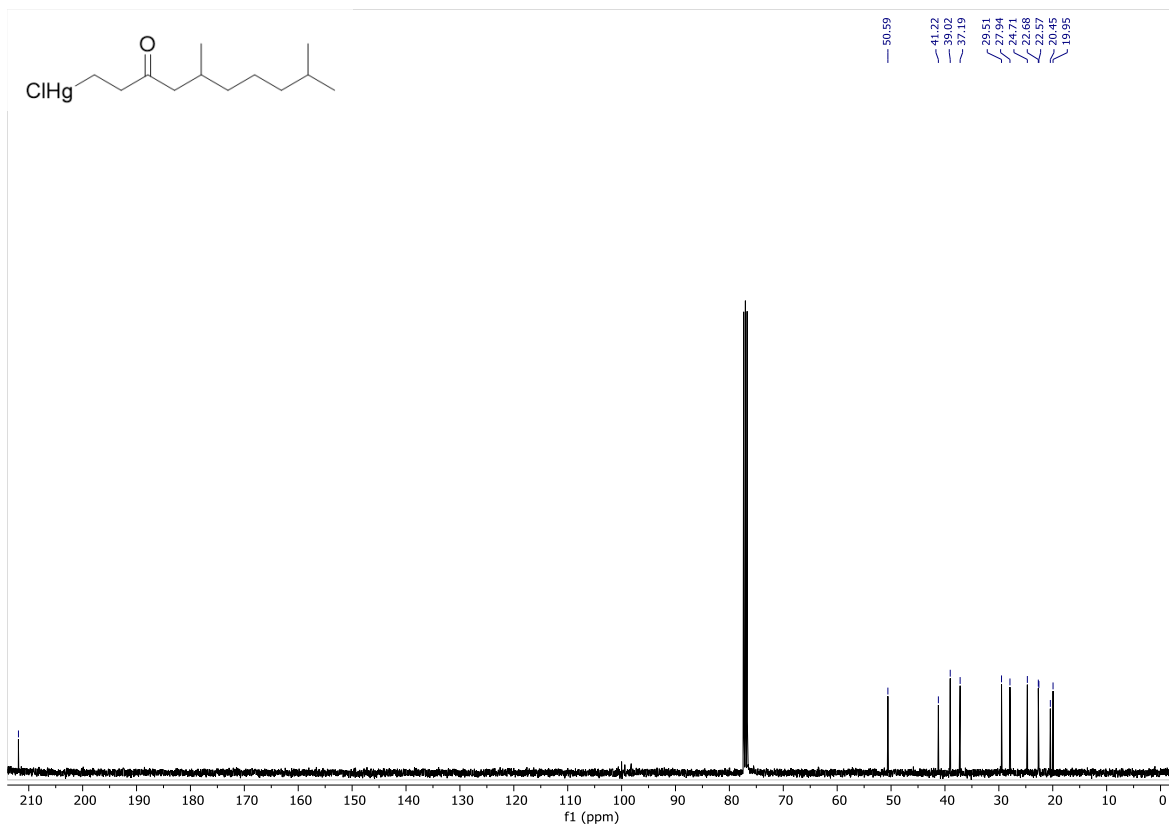

Compound 46 ( $^1\text{H}$  NMR: 400 MHz,  $^{13}\text{C}\{^1\text{H}\}$  NMR: 100 MHz)

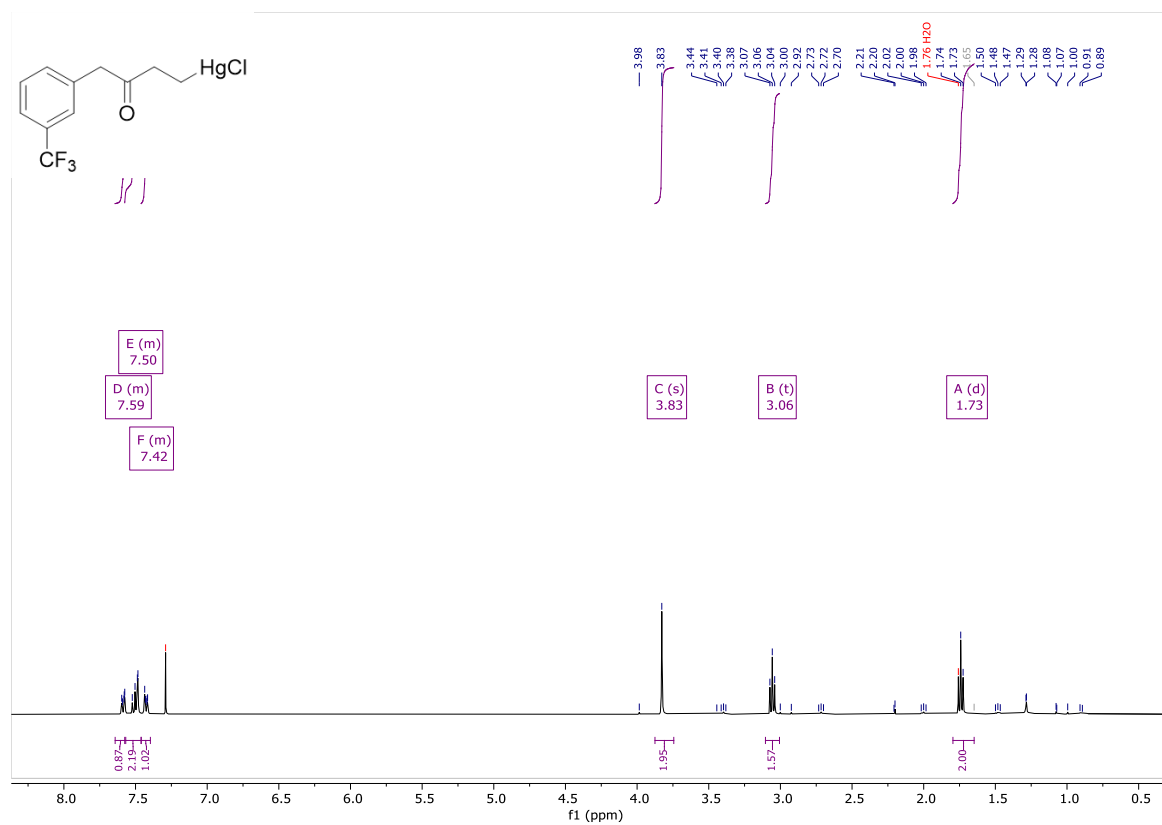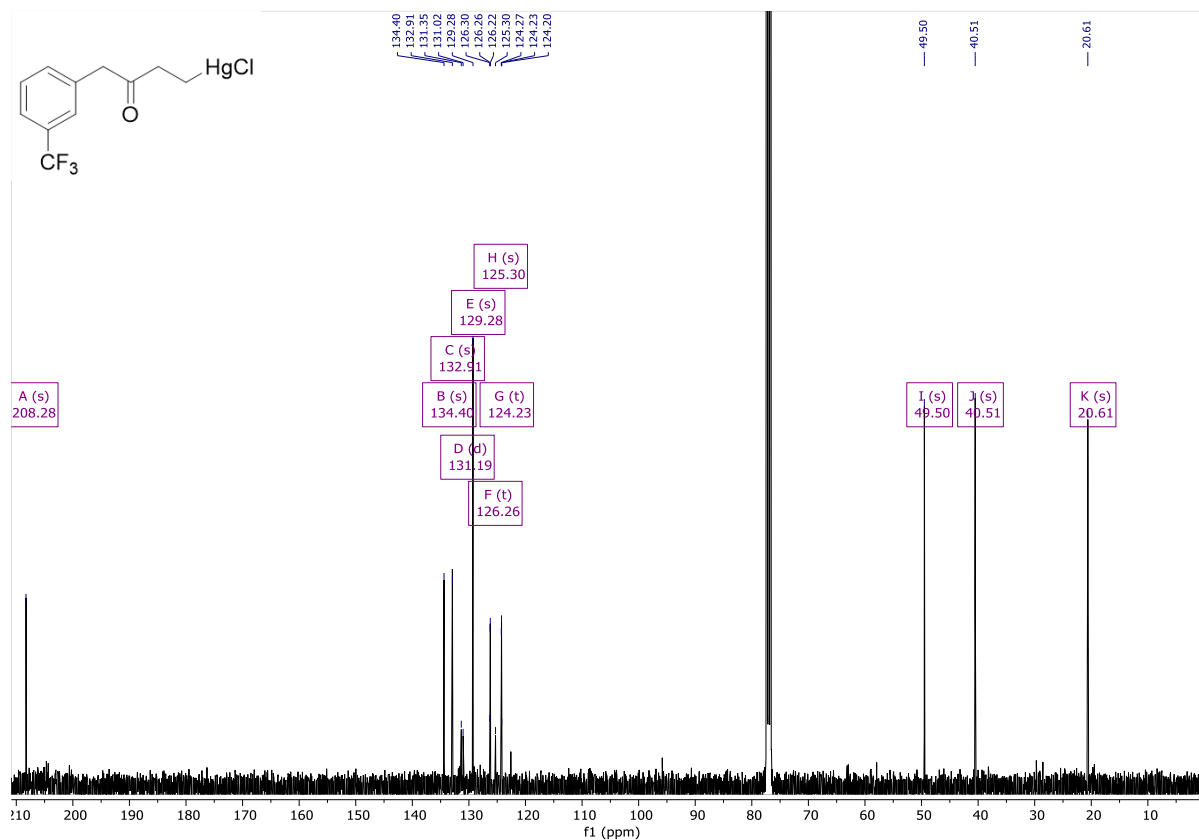



Compound 47 ( $^1\text{H}$  NMR: 400 MHz,  $^{13}\text{C}\{^1\text{H}\}$  NMR: 100 MHz)

RD-III-91 P.2.1.1r  
7.716, 7.718, 7.720, 7.722, 7.724, 7.726, 7.728, 7.730, 7.732, 7.734, 7.736, 7.738, 7.740, 7.742, 7.744, 7.746, 7.748, 7.750, 7.752, 7.754, 7.756, 7.758, 7.760, 7.762, 7.764, 7.766, 7.768, 7.770, 7.772, 7.774, 7.776, 7.778, 7.780, 7.782, 7.784, 7.786, 7.788, 7.790, 7.792, 7.794, 7.796, 7.798, 7.800, 7.802, 7.804, 7.806, 7.808, 7.810, 7.812, 7.814, 7.816, 7.818, 7.820, 7.822, 7.824, 7.826, 7.828, 7.830, 7.832, 7.834, 7.836, 7.838, 7.840, 7.842, 7.844, 7.846, 7.848, 7.850, 7.852, 7.854, 7.856, 7.858, 7.860, 7.862, 7.864, 7.866, 7.868, 7.870, 7.872, 7.874, 7.876, 7.878, 7.880, 7.882, 7.884, 7.886, 7.888, 7.890, 7.892, 7.894, 7.896, 7.898, 7.900, 7.902, 7.904, 7.906, 7.908, 7.910, 7.912, 7.914, 7.916, 7.918, 7.920, 7.922, 7.924, 7.926, 7.928, 7.930, 7.932, 7.934, 7.936, 7.938, 7.940, 7.942, 7.944, 7.946, 7.948, 7.950, 7.952, 7.954, 7.956, 7.958, 7.960, 7.962, 7.964, 7.966, 7.968, 7.970, 7.972, 7.974, 7.976, 7.978, 7.980, 7.982, 7.984, 7.986, 7.988, 7.990, 7.992, 7.994, 7.996, 7.998, 8.000

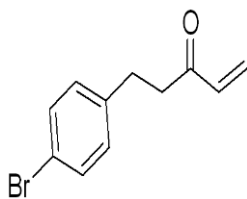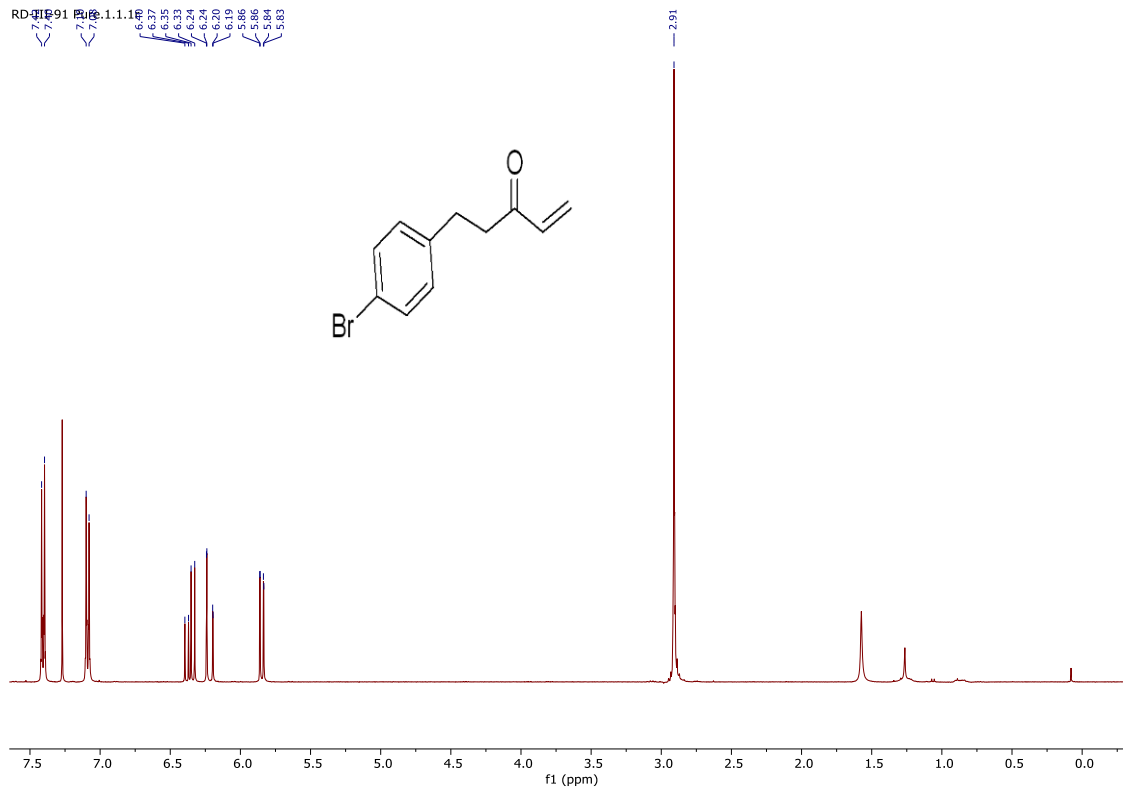

Compound 48 ( $^1\text{H}$  NMR: 400 MHz,  $^{13}\text{C}\{^1\text{H}\}$  NMR: 100 MHz)

RD-III-82  
7.33  
7.13  
7.06

3.30  
3.29  
3.27  
3.07  
3.06  
3.04  
2.90  
2.88  
2.75  
2.73  
2.71

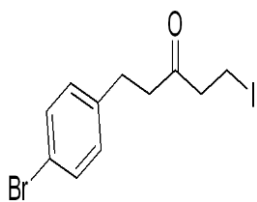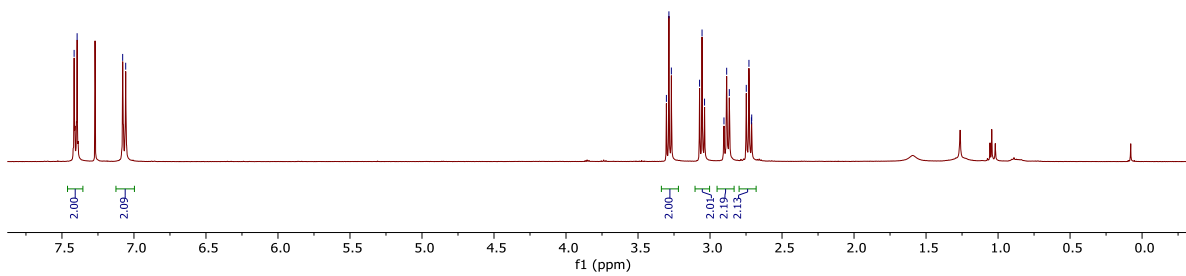

RD-III-82 carbon.1.1.1r

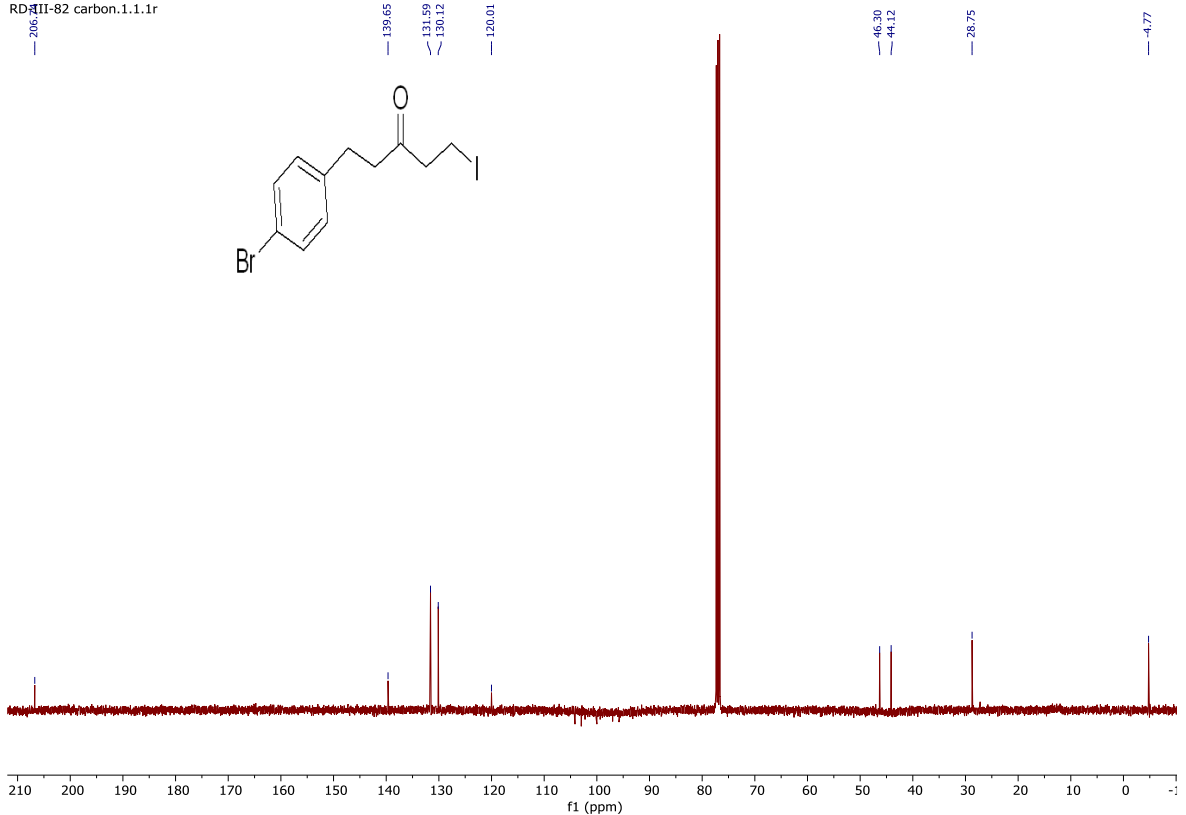



Compound 50 ( $^1\text{H}$  NMR: 600 MHz,  $^{13}\text{C}\{^1\text{H}\}$  NMR: 125 MHz)

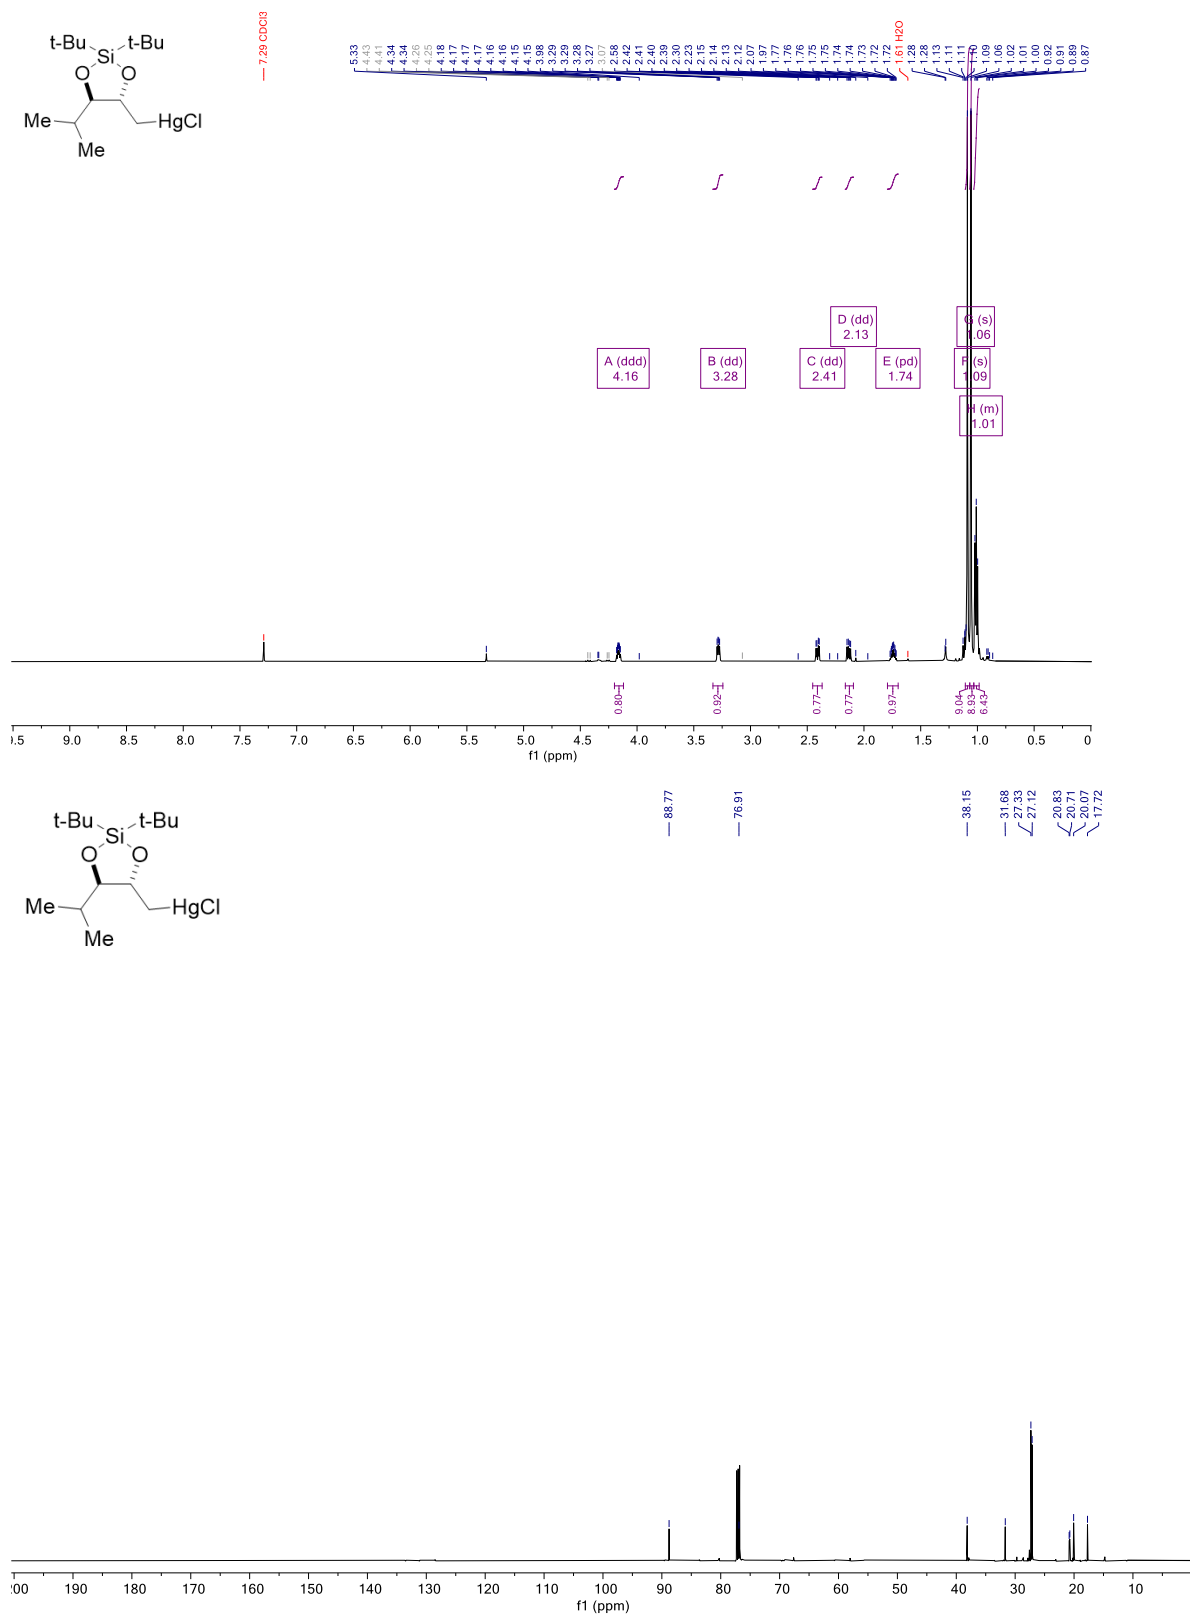

Compound 51 ( $^1\text{H}$  NMR: 400 MHz,  $^{13}\text{C}$ { $^1\text{H}$ } NMR: 100 MHz)

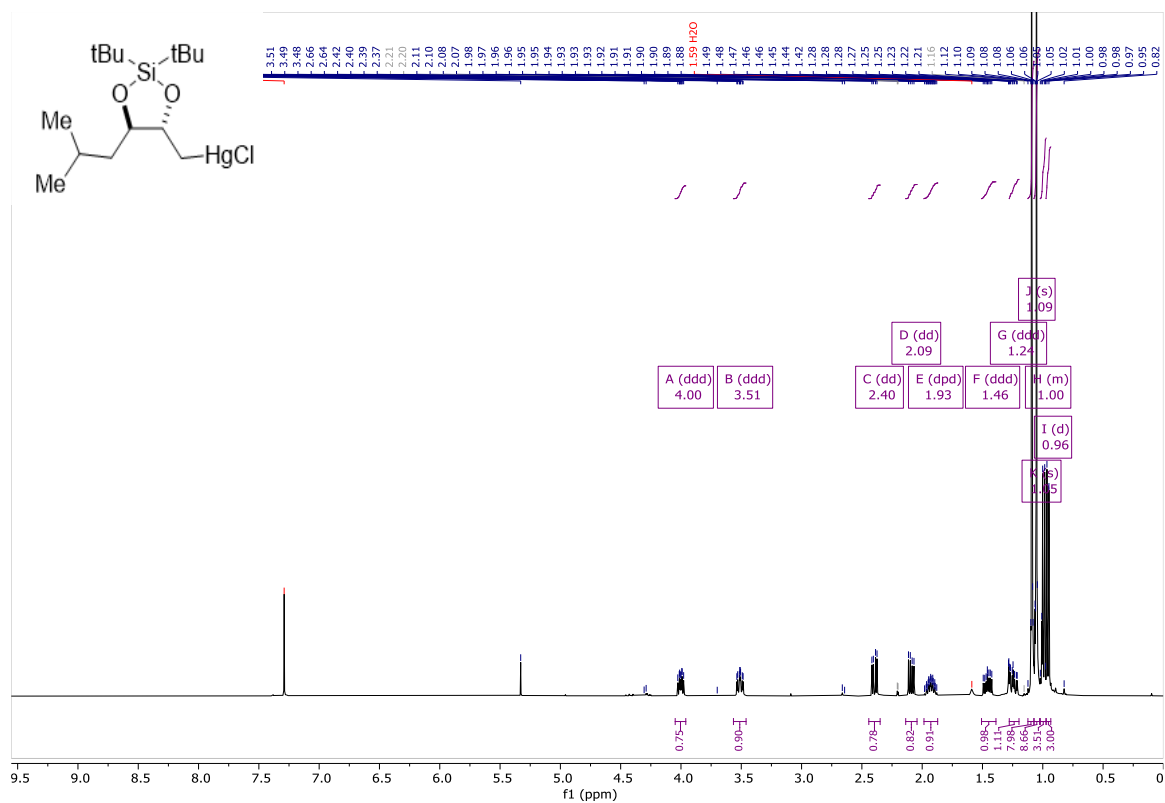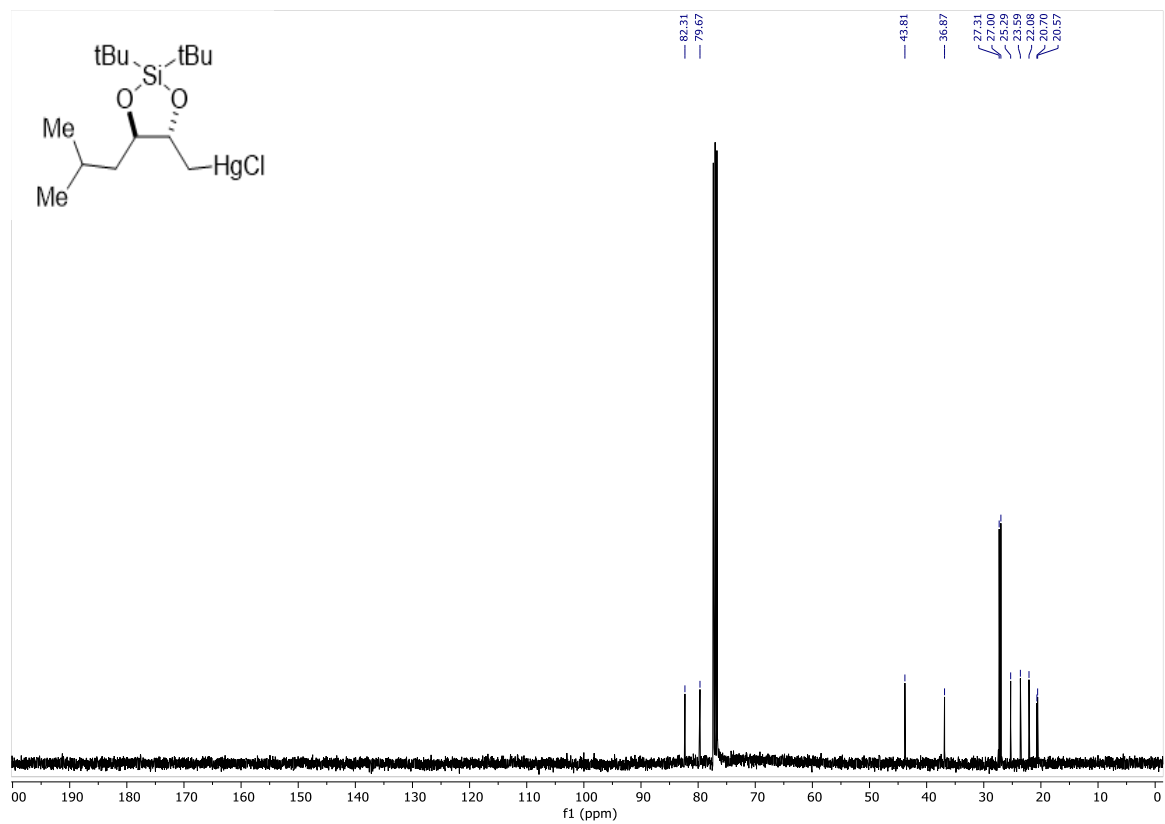

Compound 52 ( $^1\text{H}$  NMR: 600 MHz,  $^{13}\text{C}\{^1\text{H}\}$  NMR: 125 MHz)

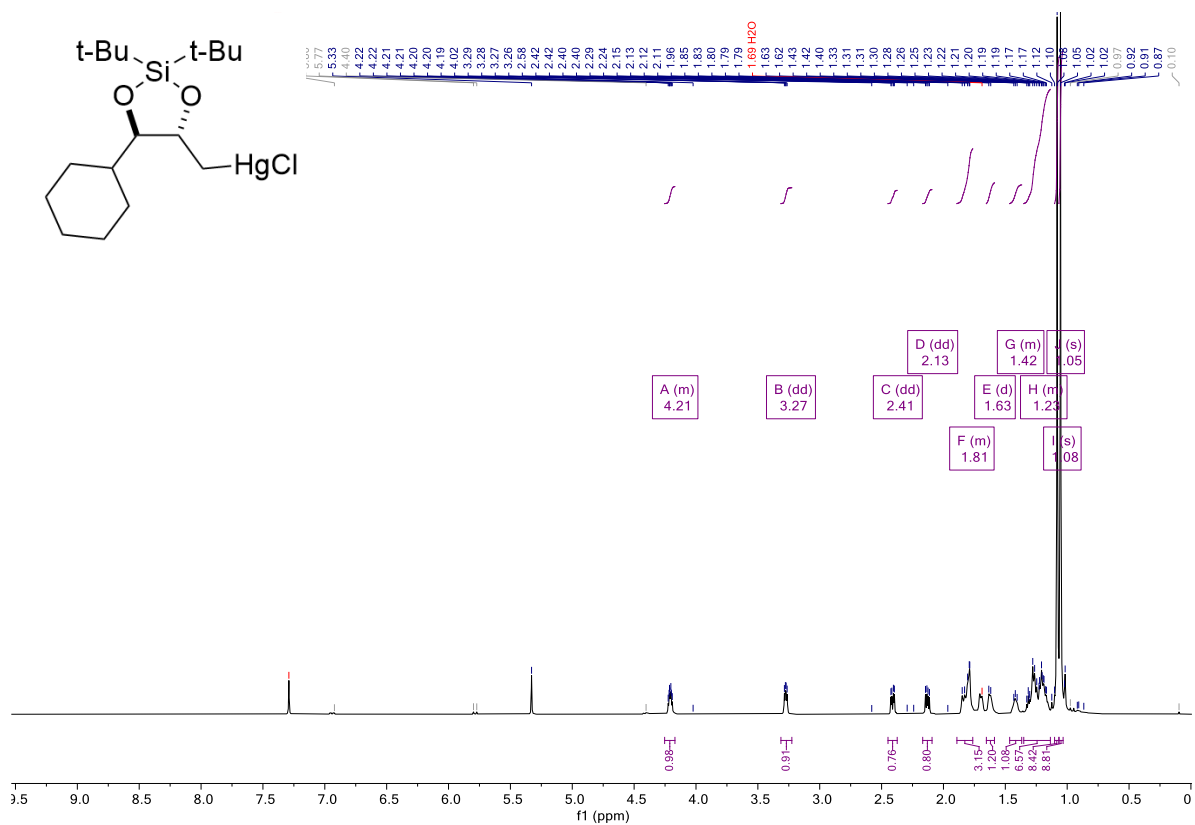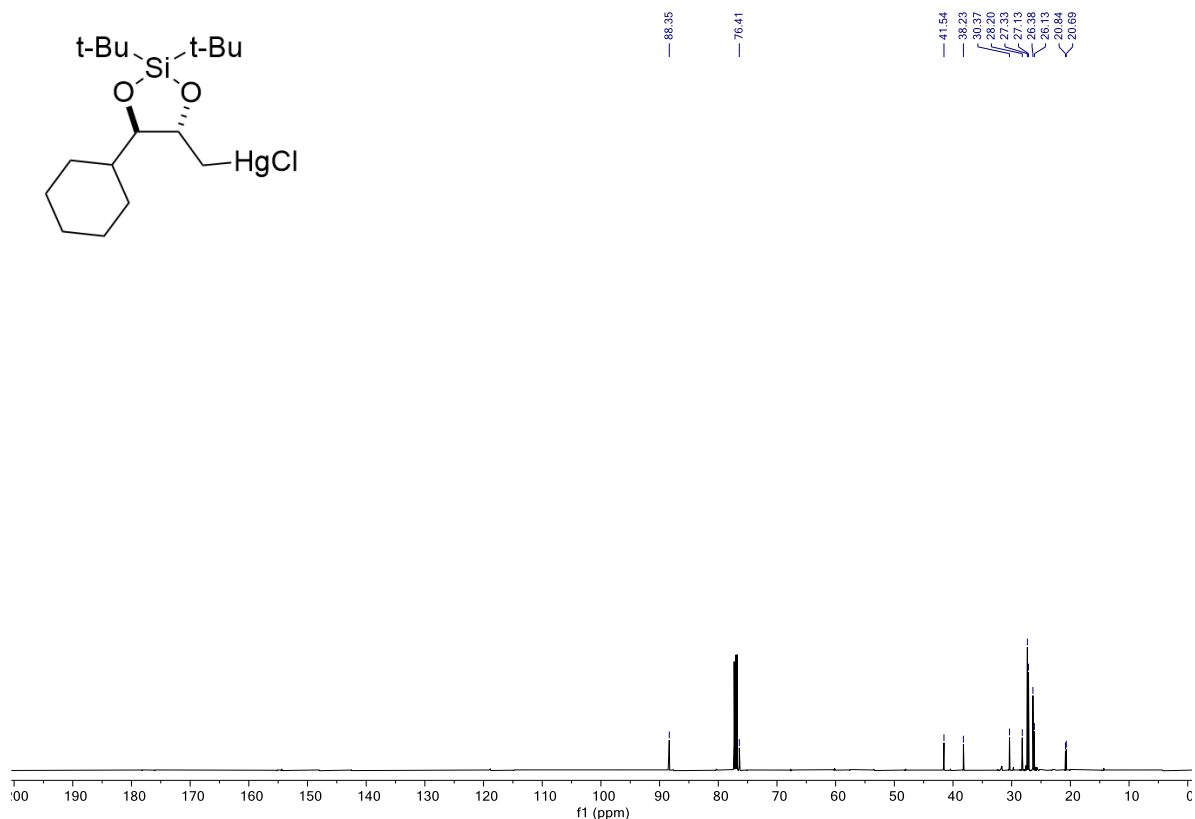

Compound 53 ( $^1\text{H}$  NMR: 600 MHz,  $^{13}\text{C}$  NMR: 125 MHz)

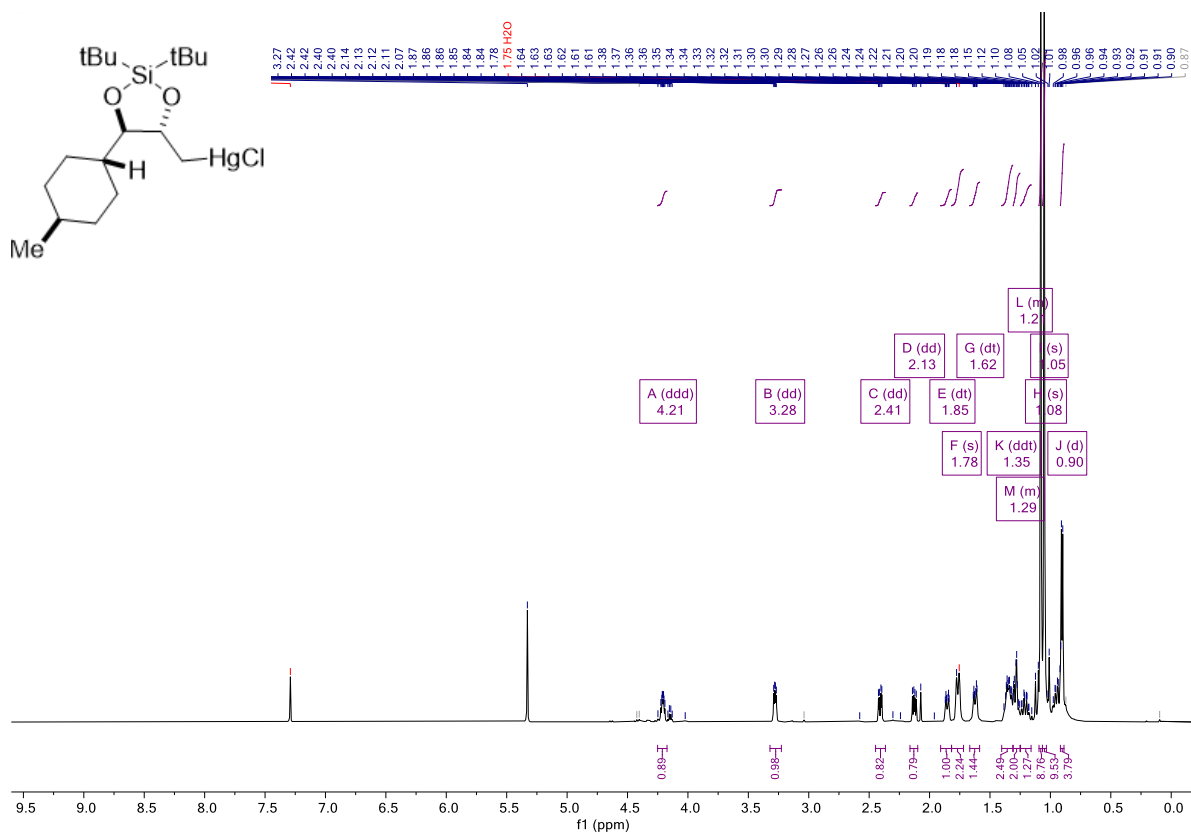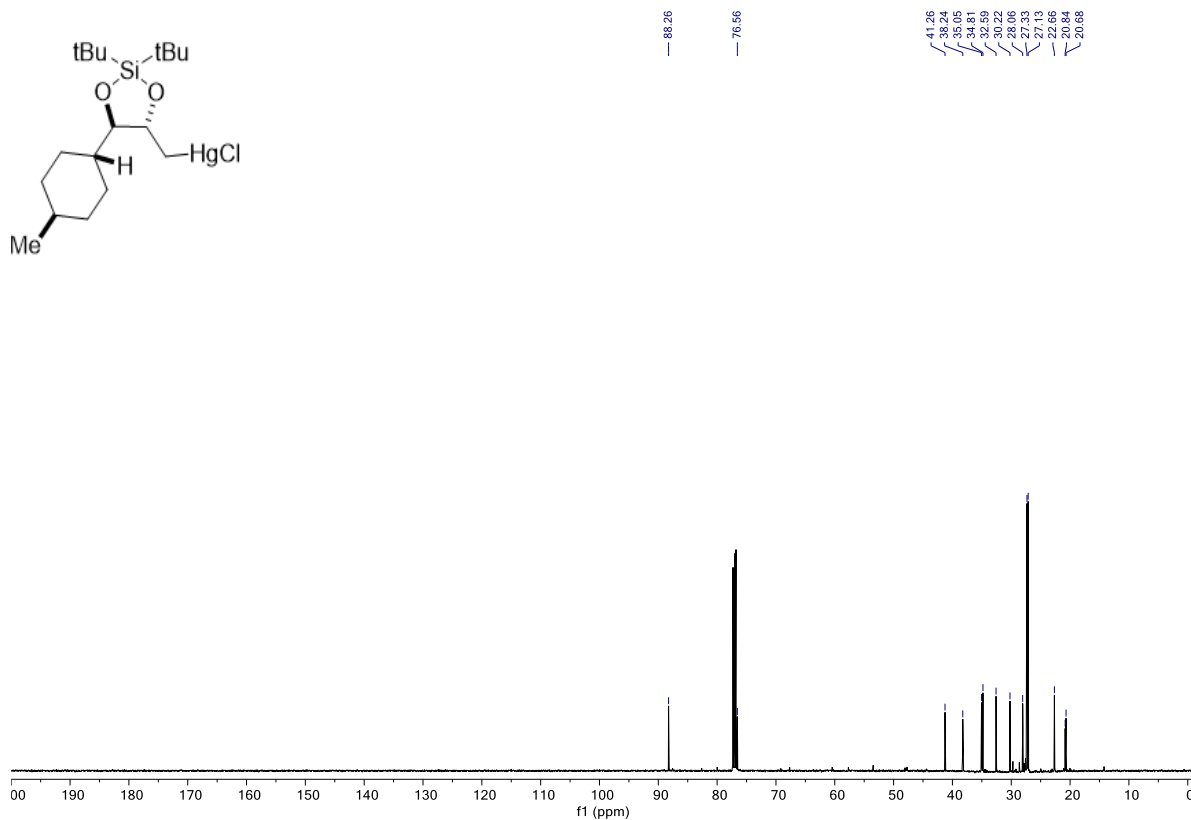





Compound 55 ( $^1\text{H}$  NMR: 600 MHz,  $^{13}\text{C}\{^1\text{H}\}$  NMR: 125 MHz)

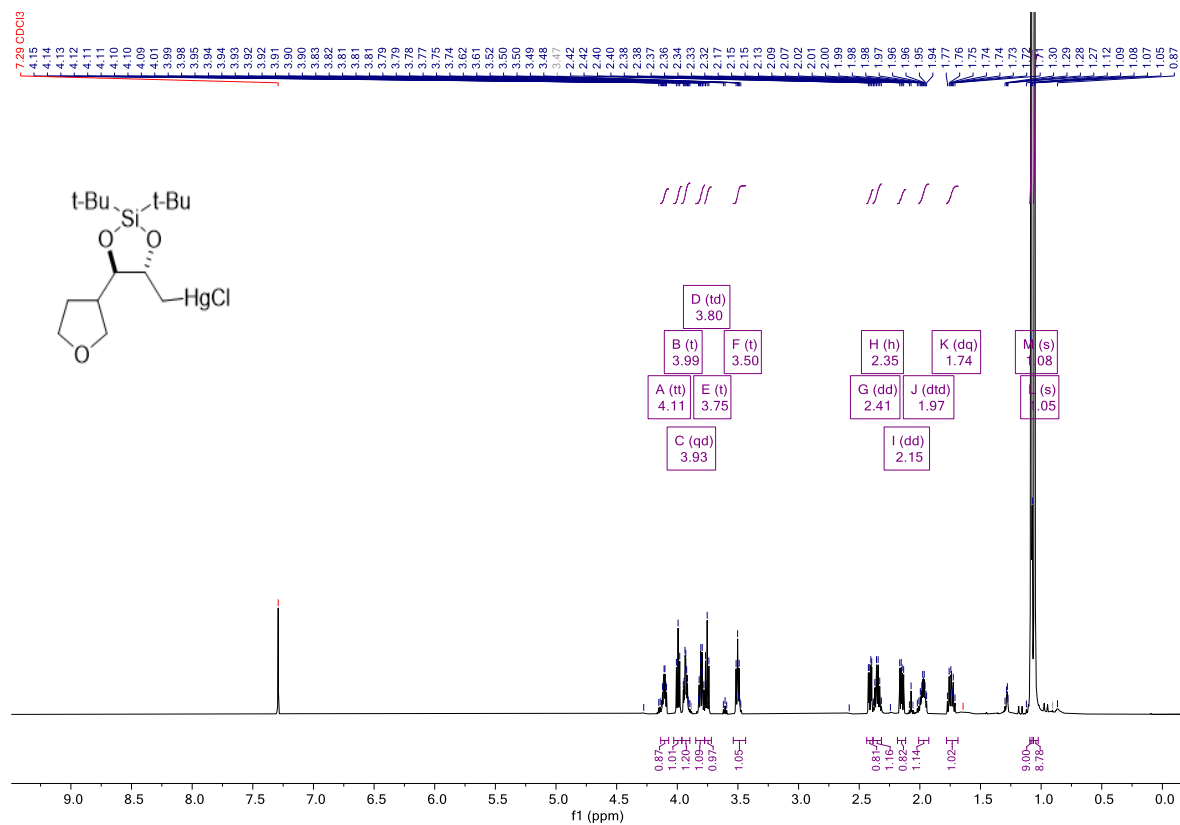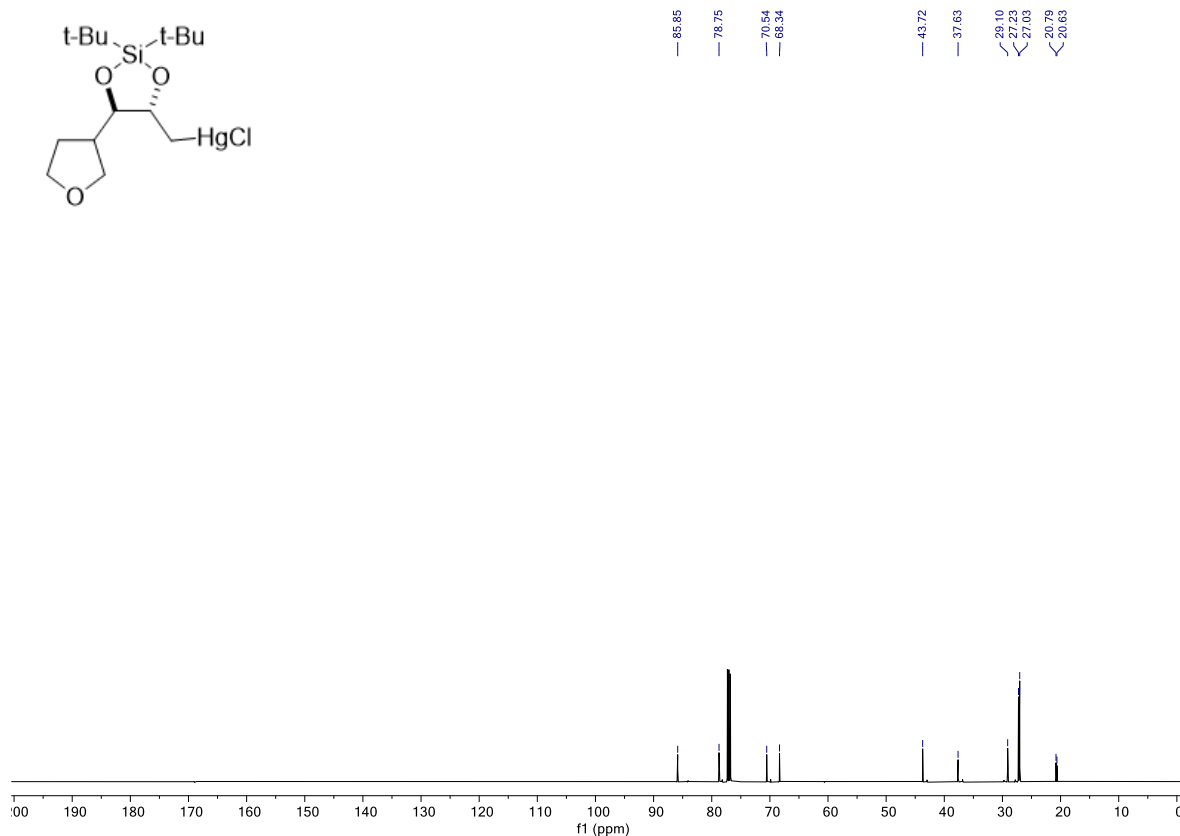

Compound 56 ( $^1\text{H}$  NMR: 600 MHz,  $^{13}\text{C}$ { $^1\text{H}$ } NMR: 100 MHz)

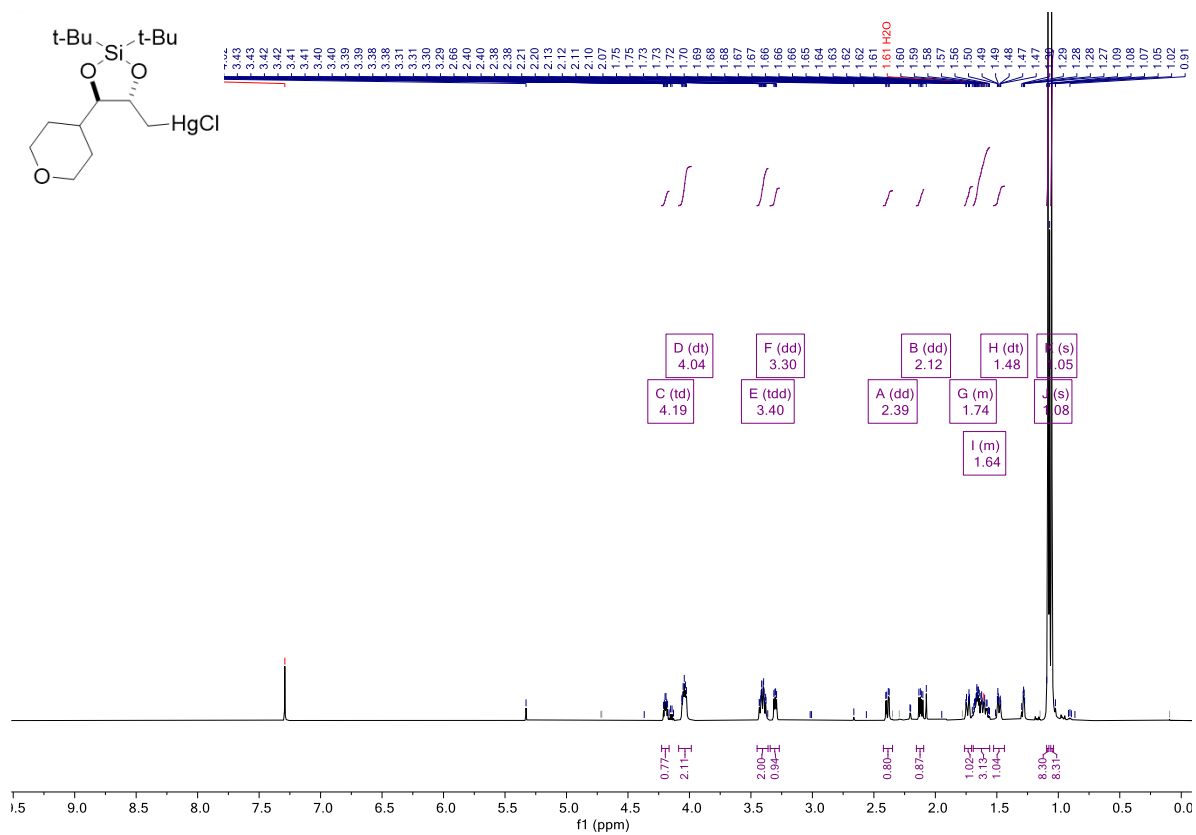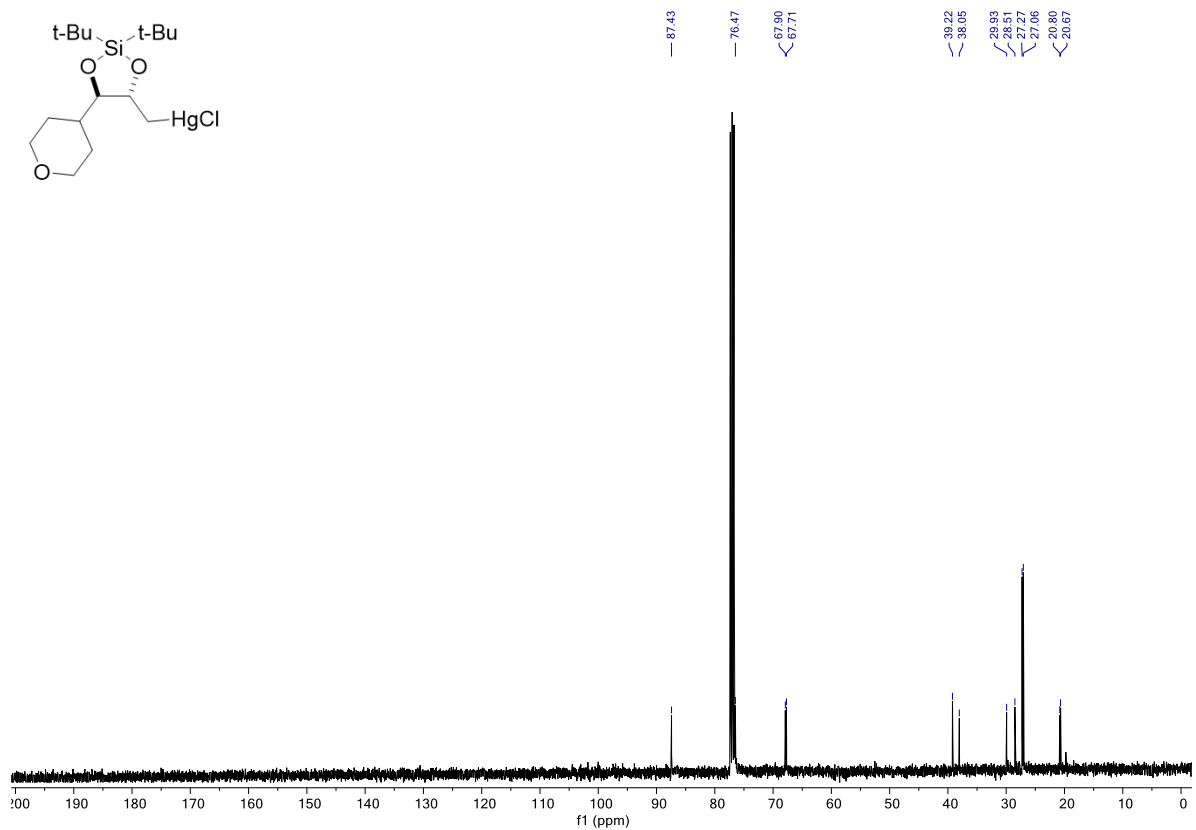

Compound 57 ( $^1\text{H}$  NMR: 400 MHz,  $^{13}\text{C}$ { $^1\text{H}$ } NMR: 100 MHz)

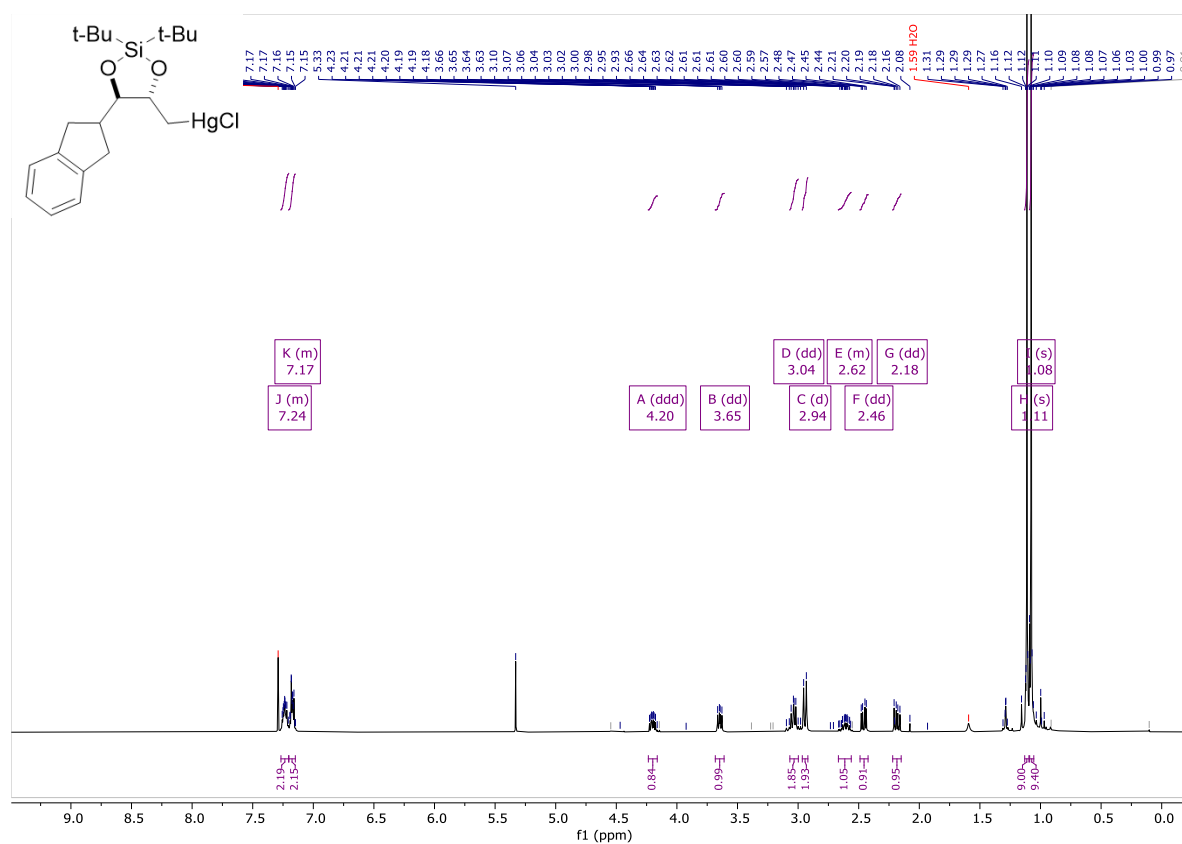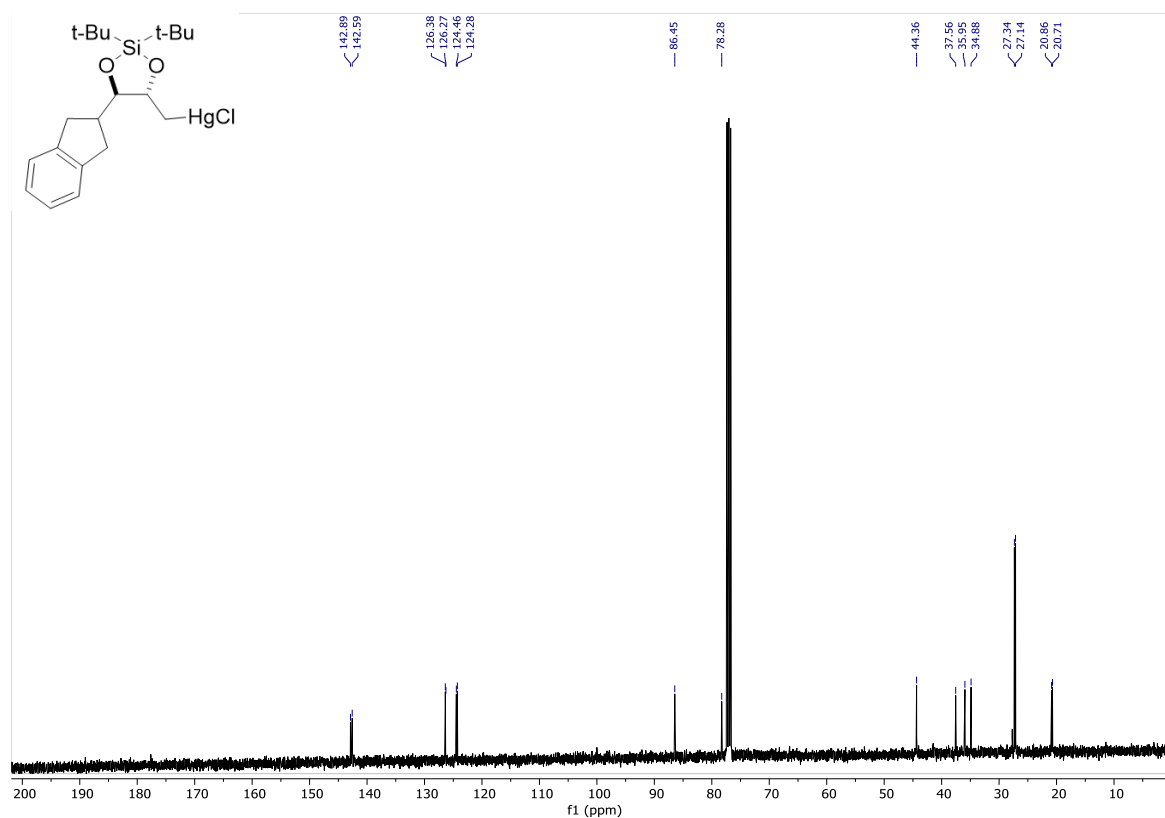



Compound 59 ( $^1\text{H}$  NMR: 400 MHz,  $^{13}\text{C}$ { $^1\text{H}$ } NMR: 100 MHz)

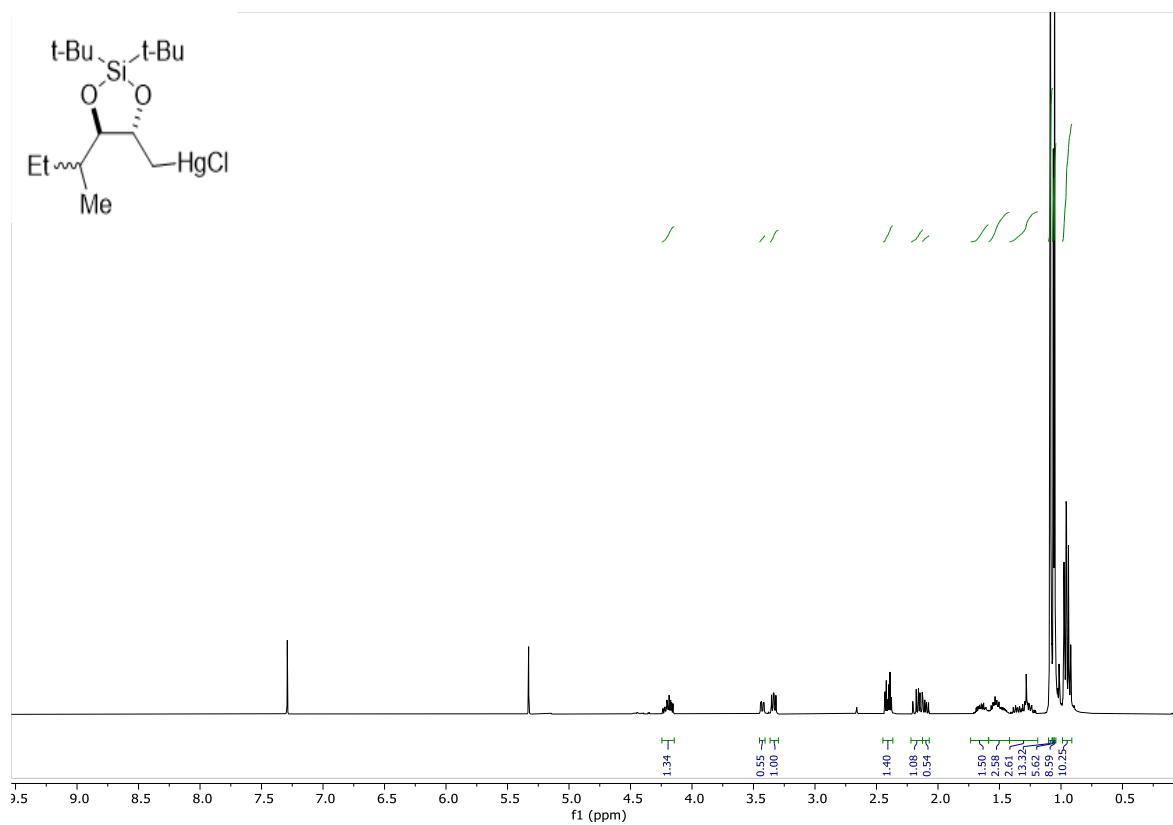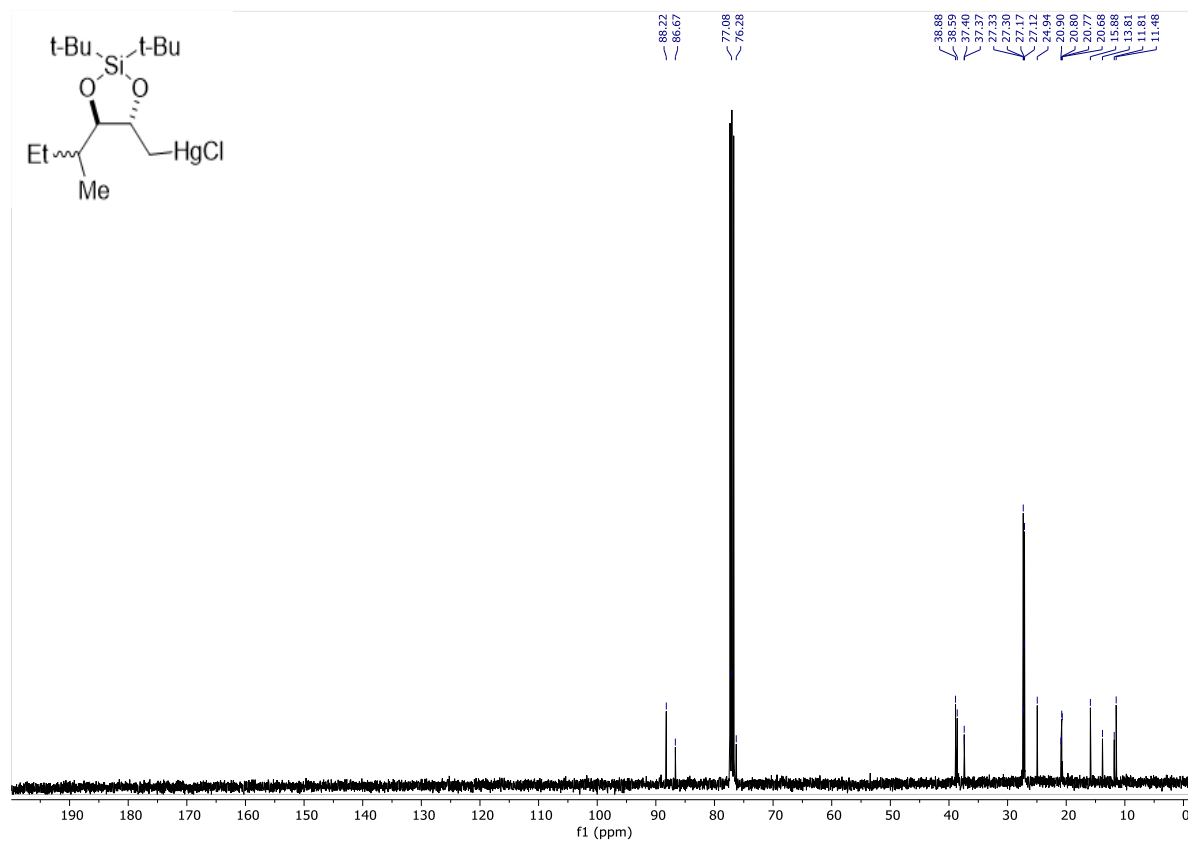

Compound 60 ( $^1\text{H}$  NMR: 600 MHz,  $^{13}\text{C}$ { $^1\text{H}$ } NMR: 125 MHz)

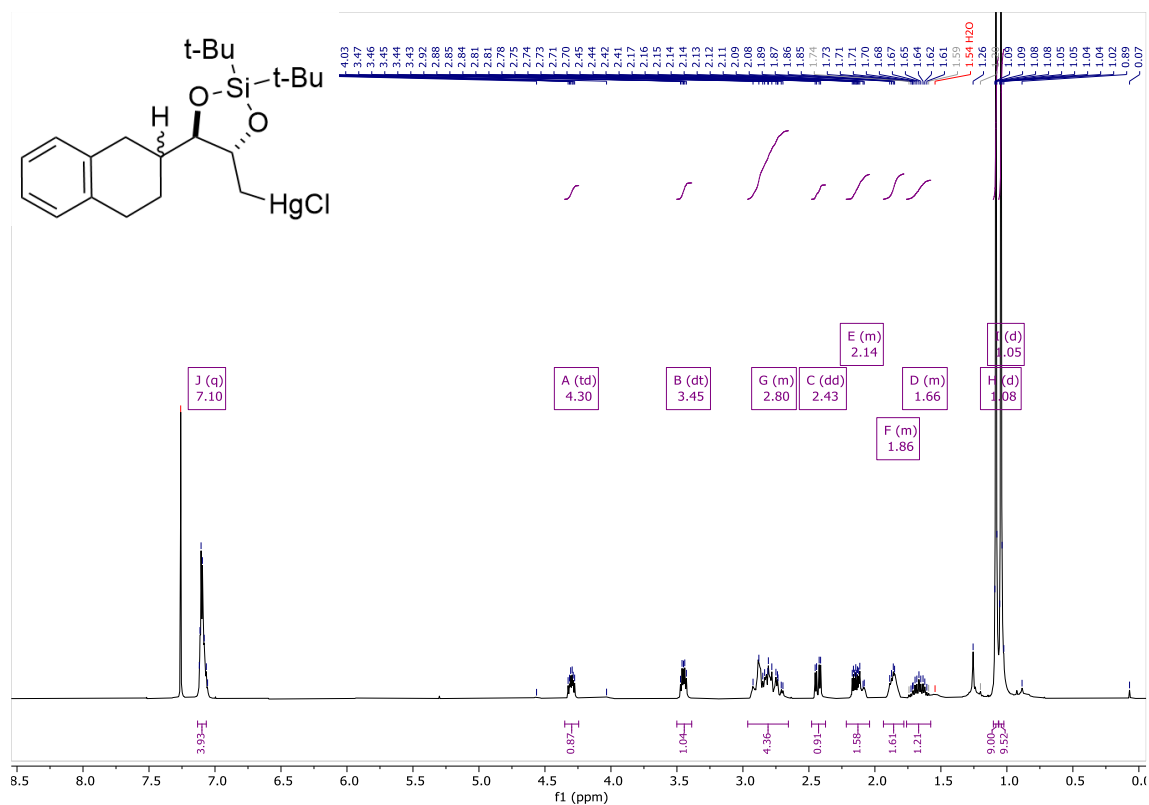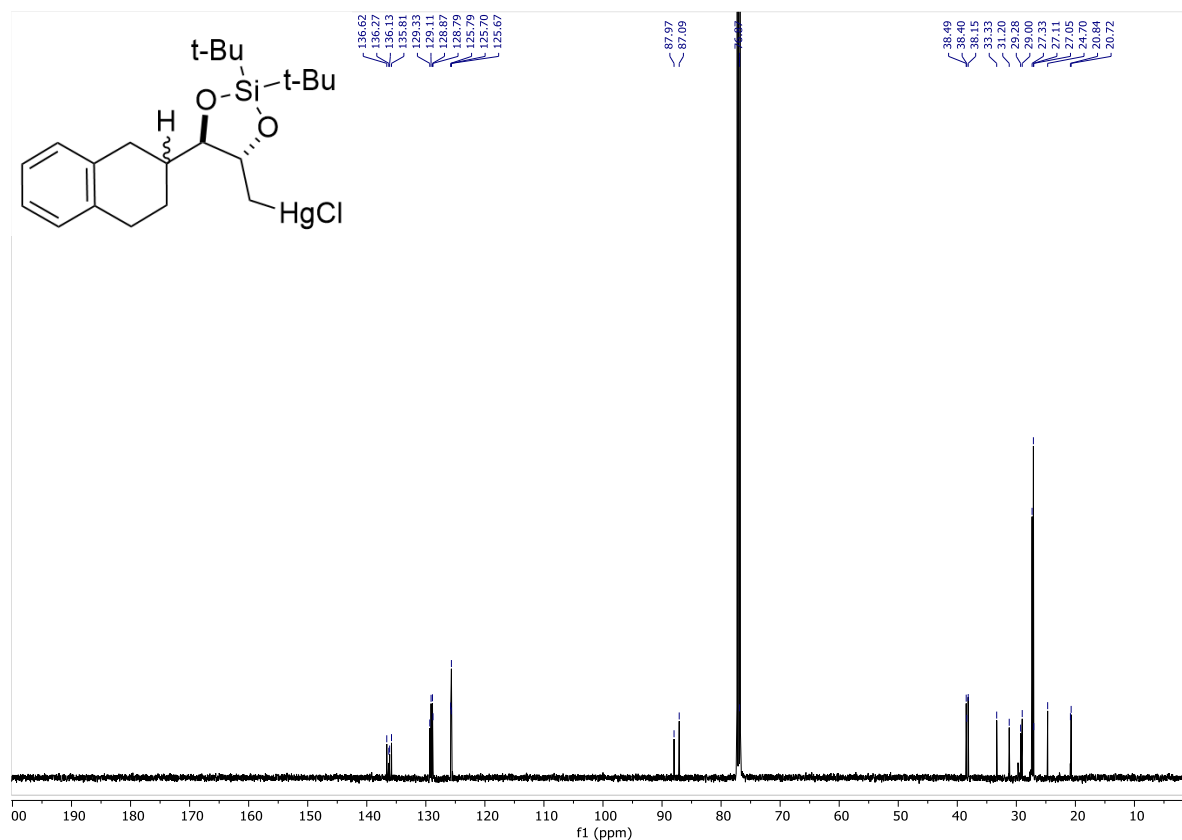

Compound 61 ( $^1\text{H}$  NMR: 400 MHz,  $^{13}\text{C}\{^1\text{H}\}$  NMR: 100 MHz)

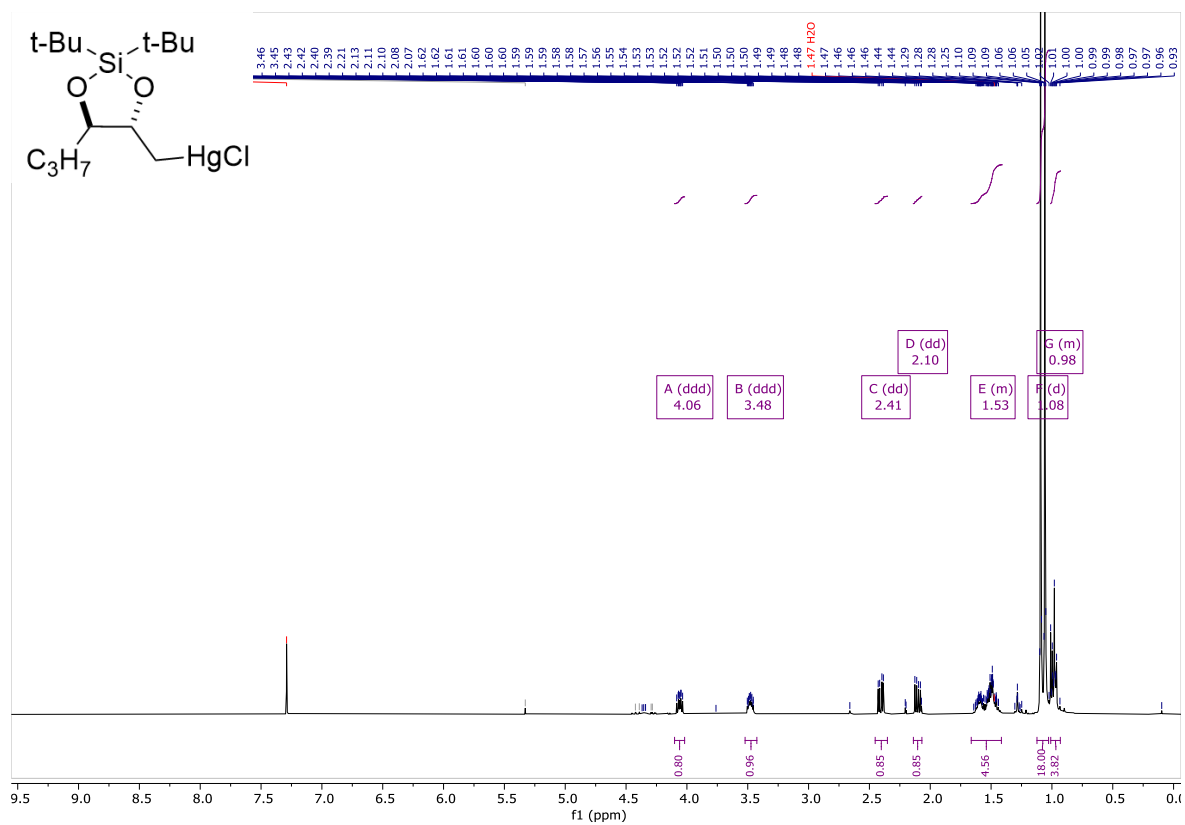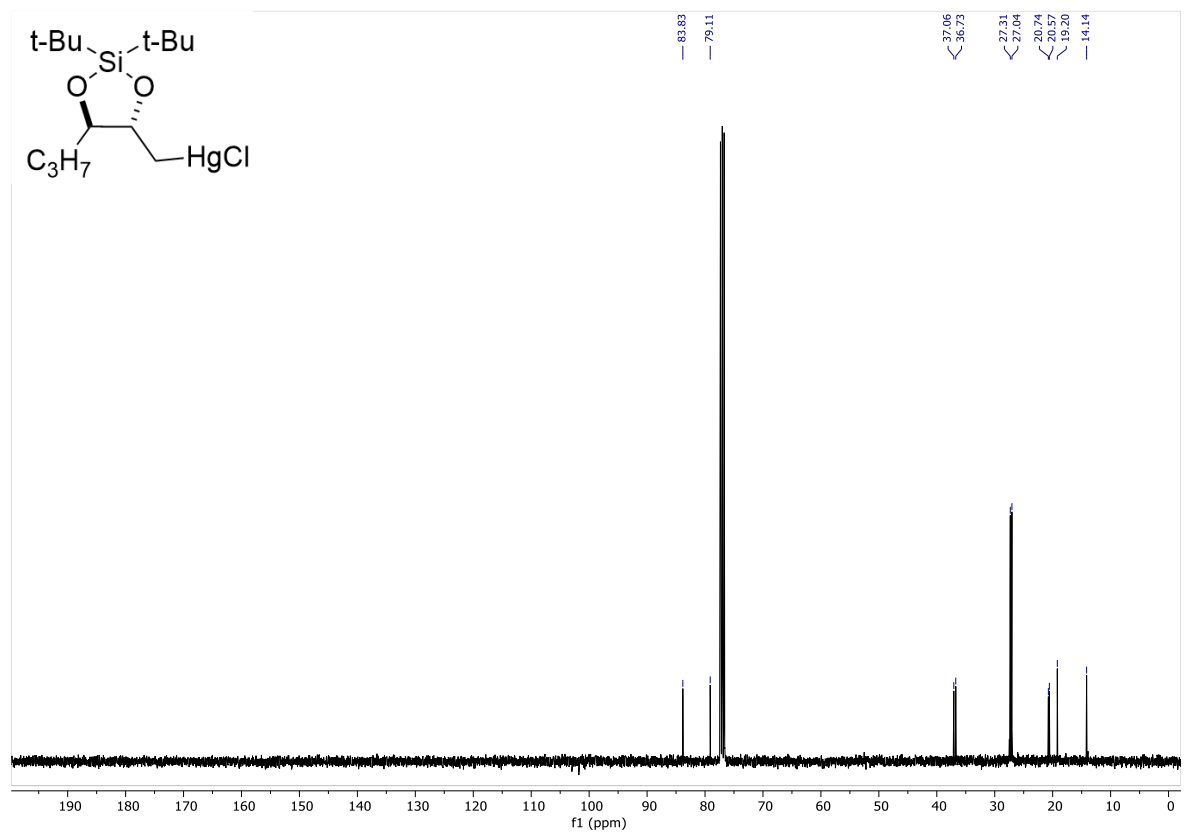

Compound 62 ( $^1\text{H}$  NMR: 400 MHz,  $^{13}\text{C}\{^1\text{H}\}$  NMR: 100 MHz)

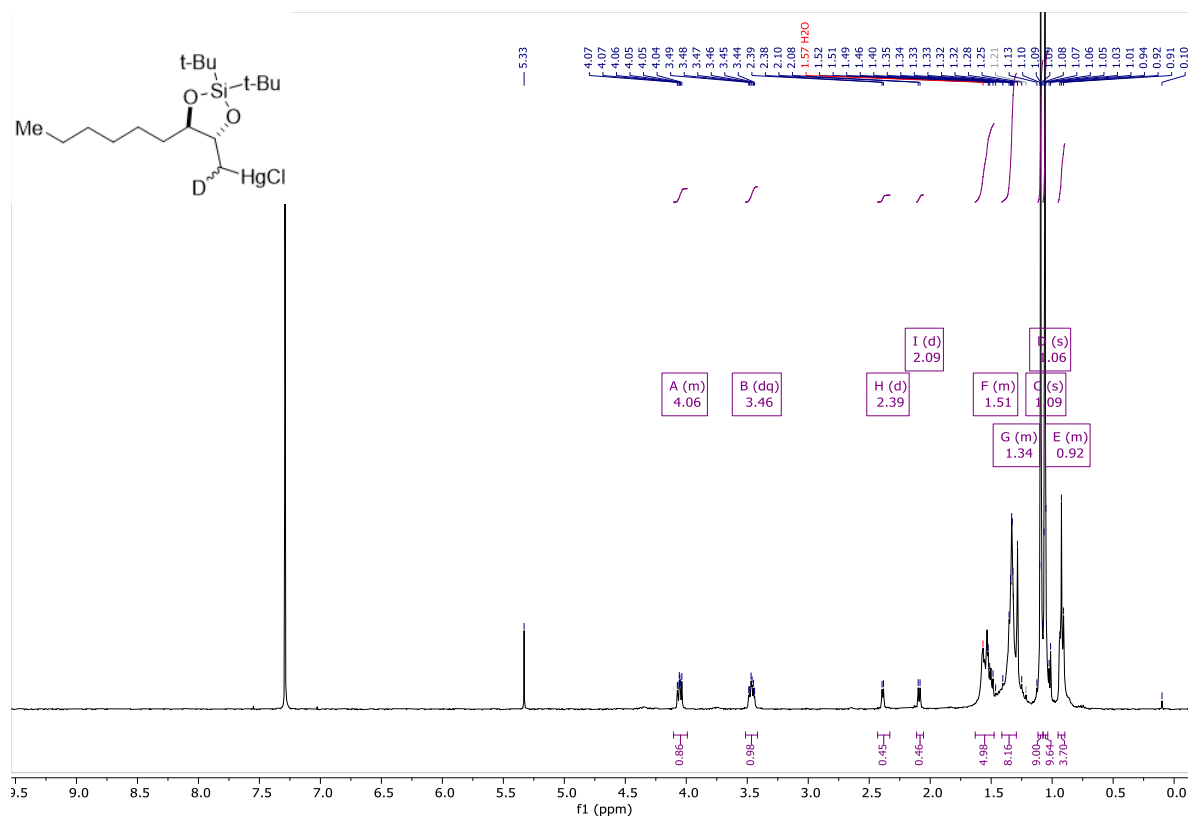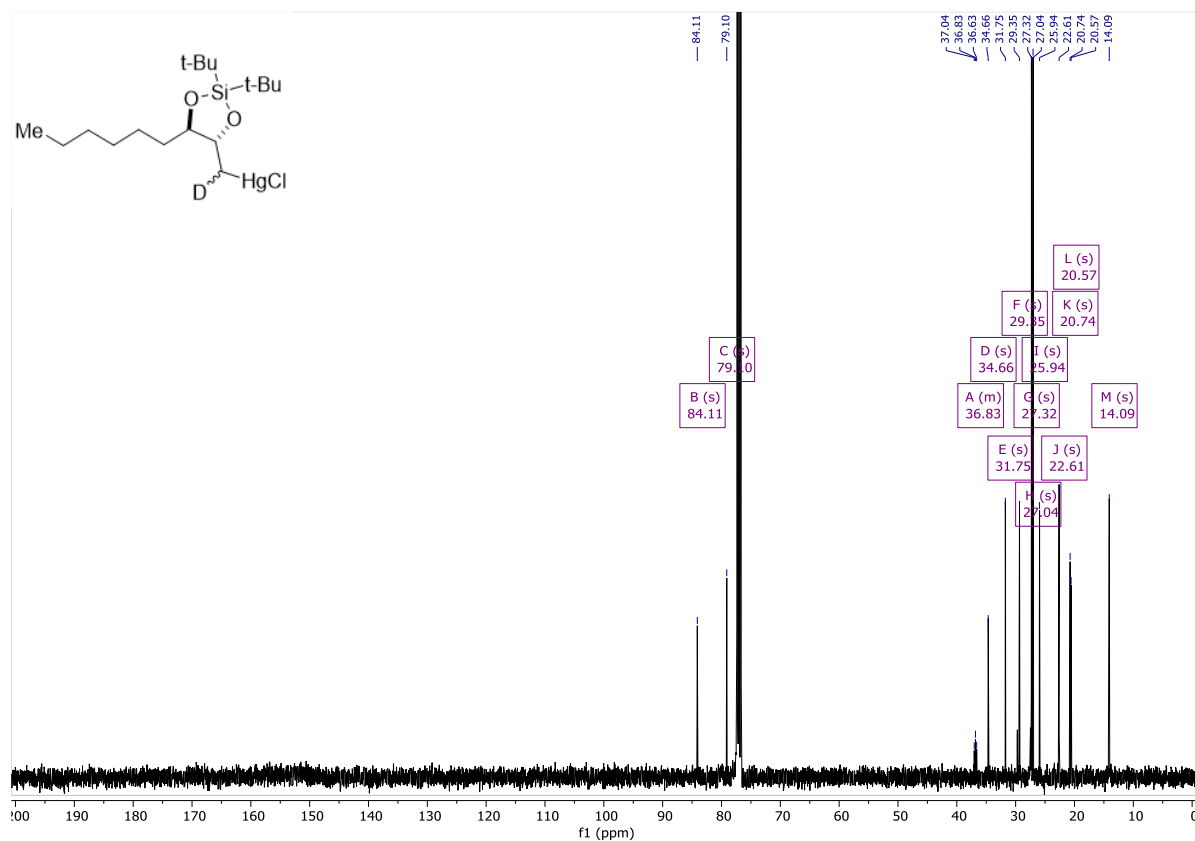



Compound 63 ( $^1\text{H}$  NMR: 400 MHz,  $^{13}\text{C}$ { $^1\text{H}$ } NMR: 100 MHz)

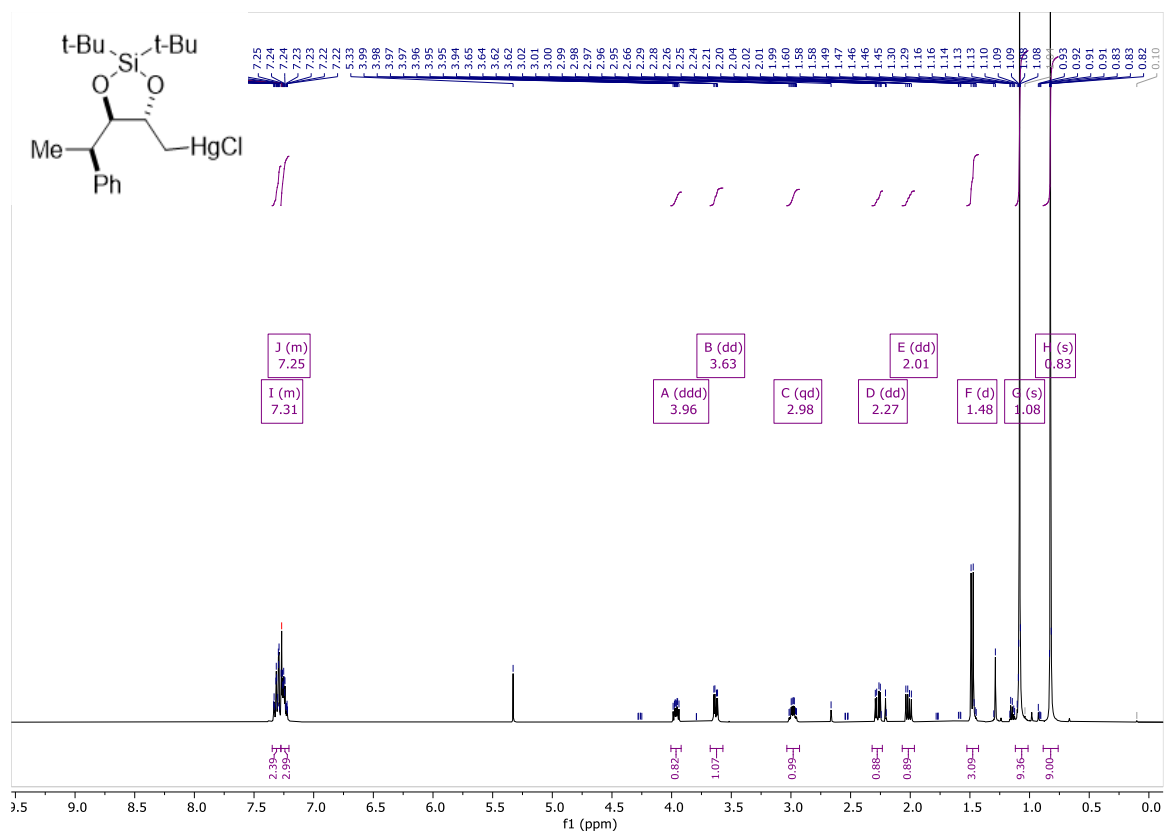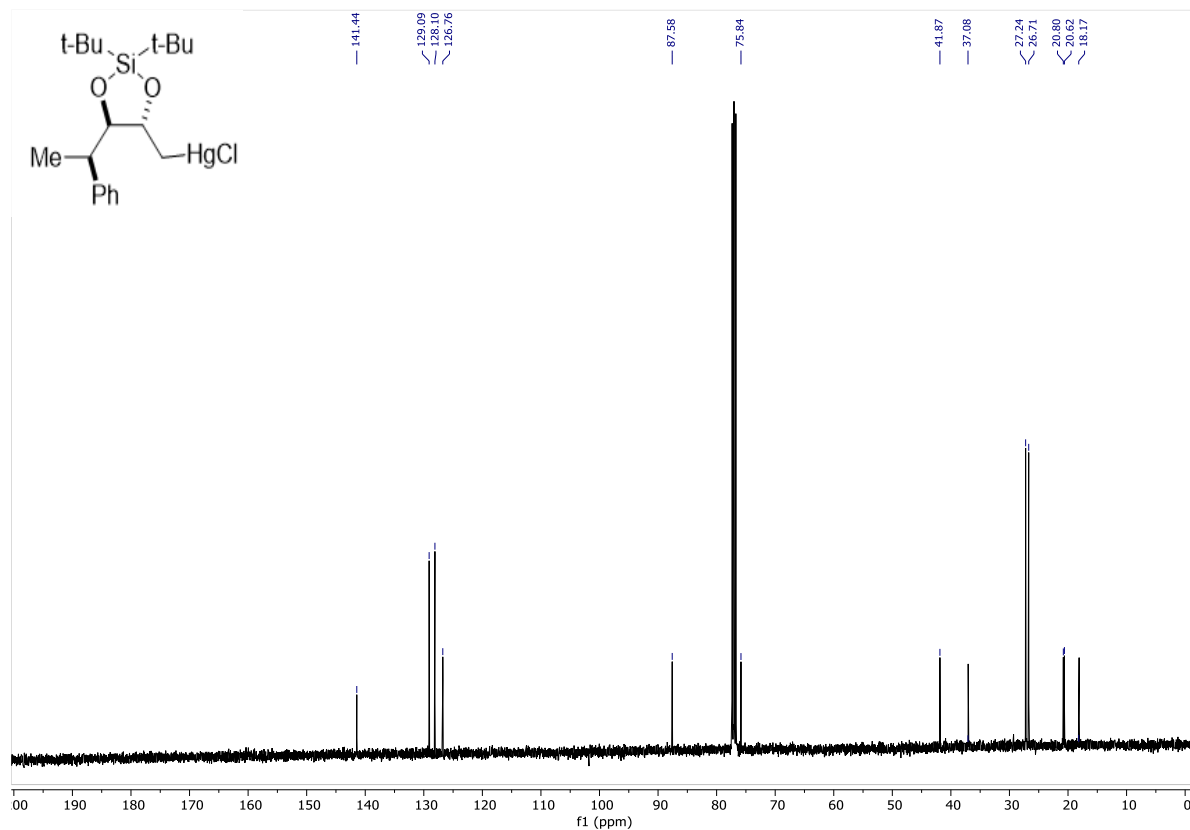

Compound 64 ( $^1\text{H}$  NMR: 400 MHz,  $^{13}\text{C}$ { $^1\text{H}$ } NMR: 100 MHz)

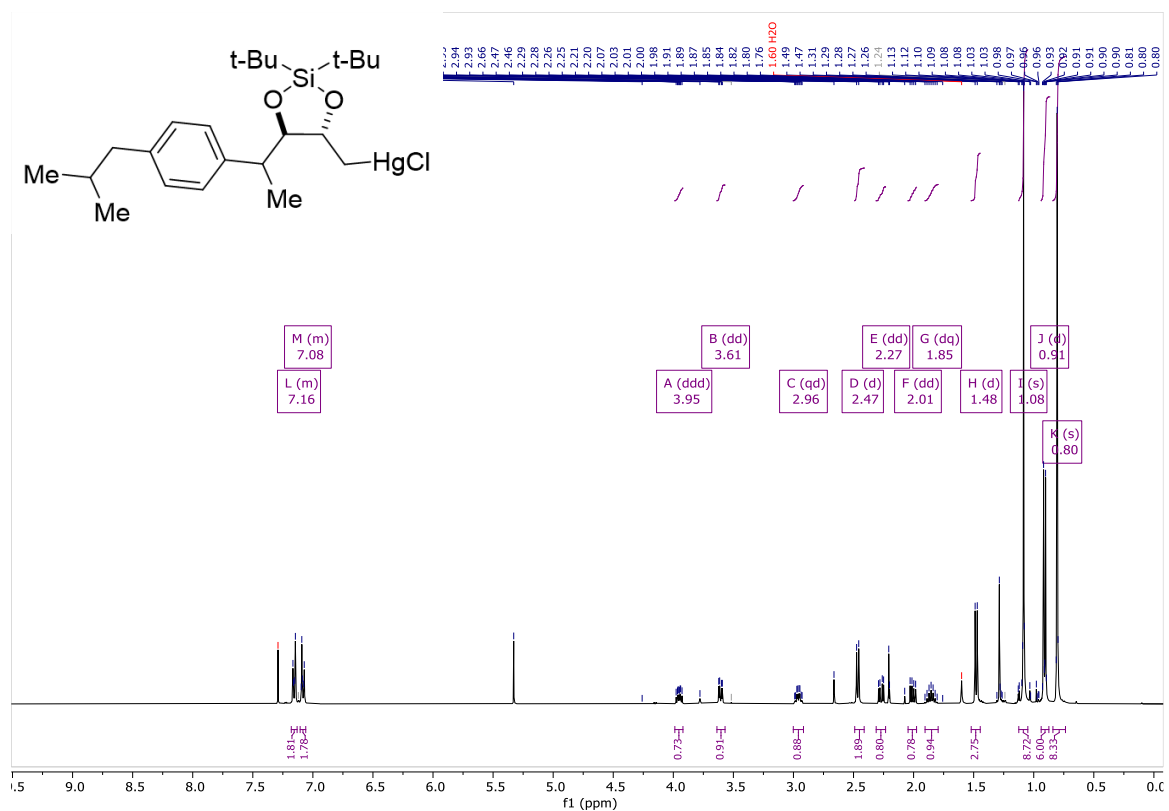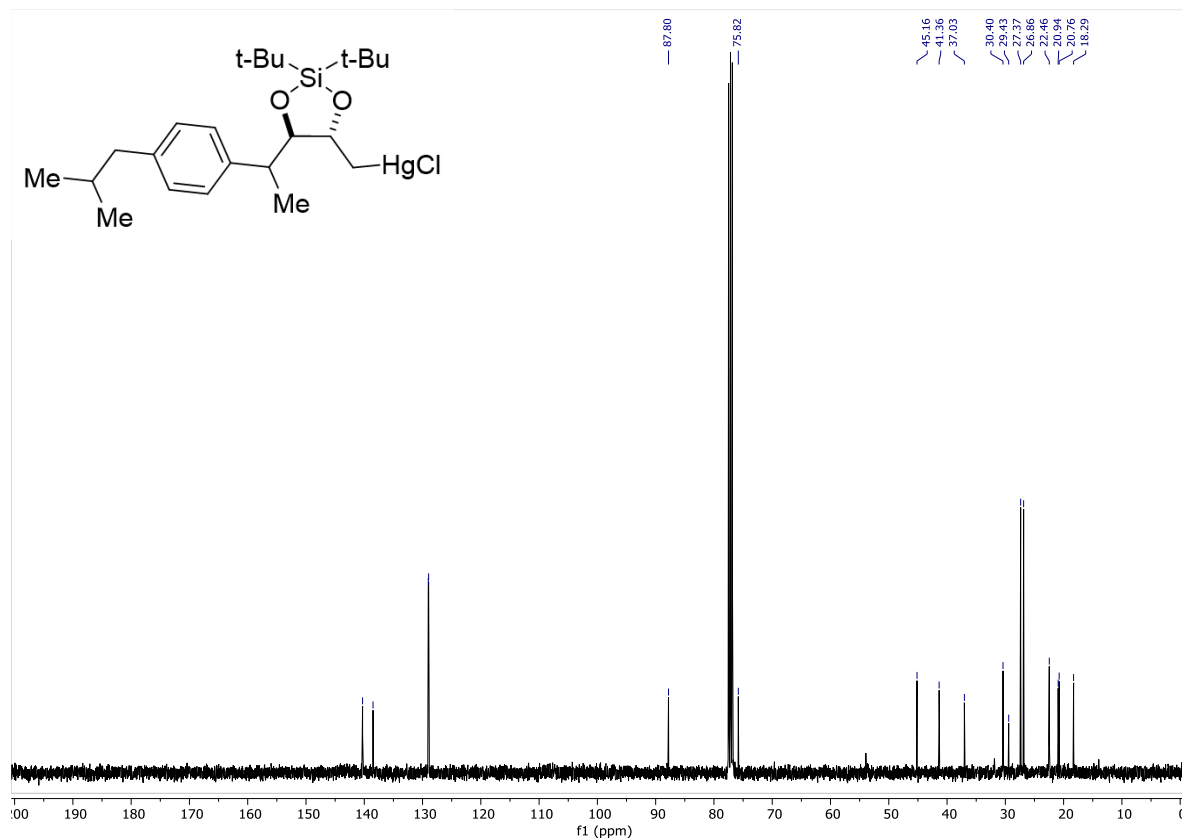

Compound 66 ( $^1\text{H}$  NMR: 400 MHz,  $^{13}\text{C}$ { $^1\text{H}$ } NMR: 100 MHz)

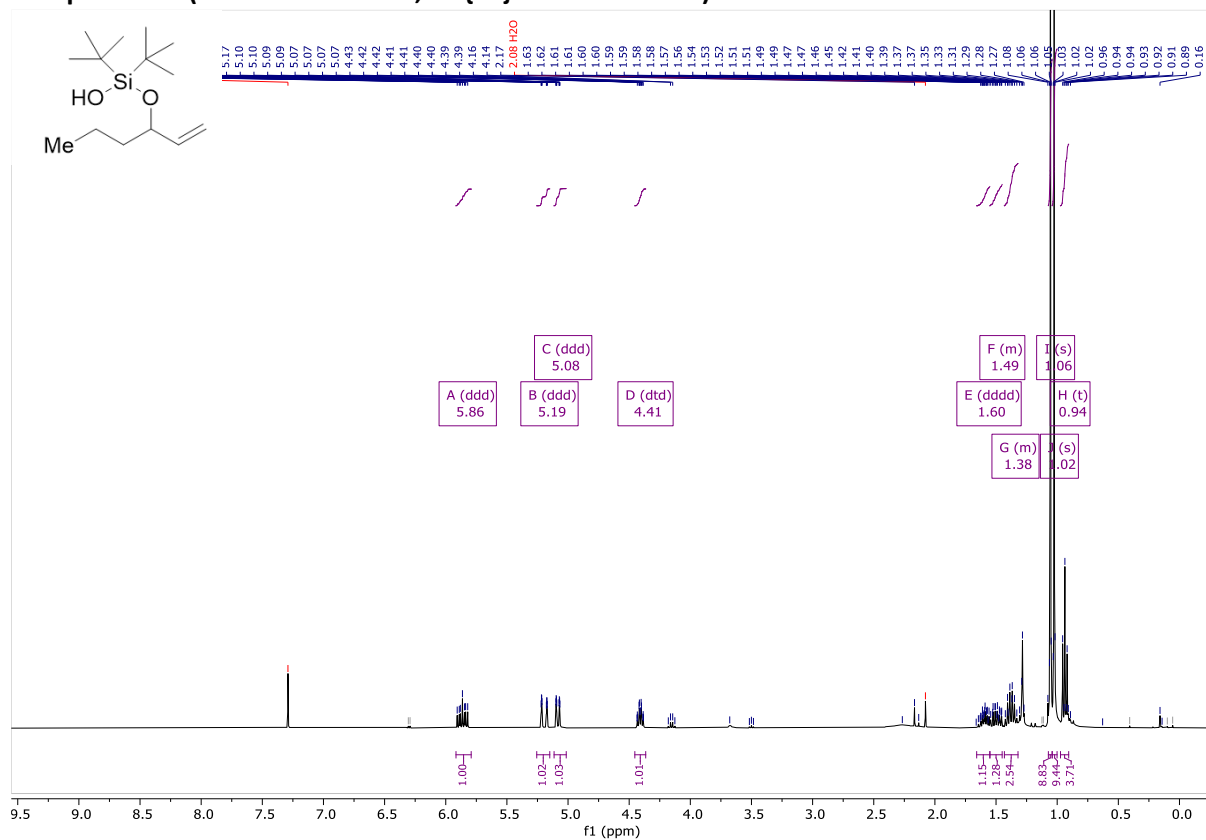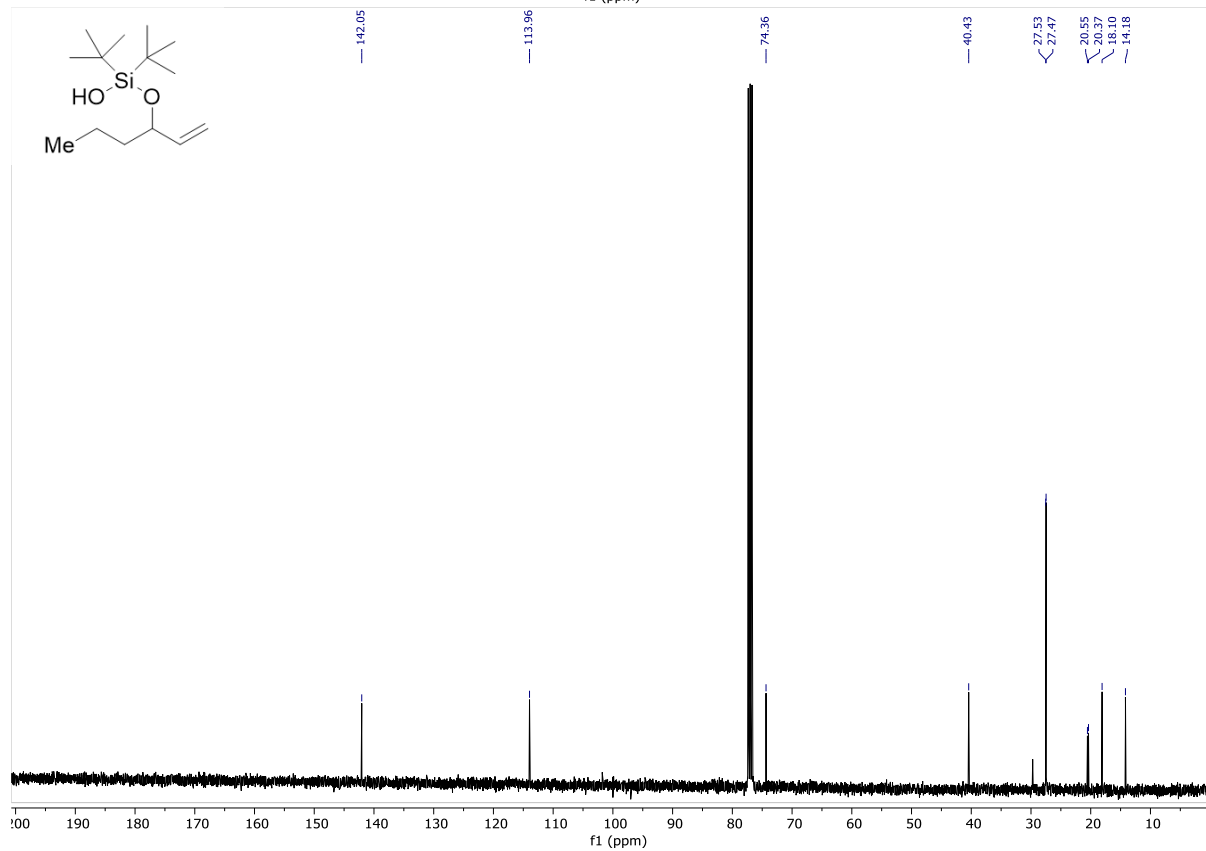

Supplement: d1qo01008e1.pdf [file d1qo01008e1.pdf]
